# Supplementary material for: Cultural and Ethical Barriers to Cancer Treatment in Nursing Homes and Educational Strategies: A Scoping Review
Source: MDPI journal article supplement (doi:10.3390/cancers13143514), 2021-07-14
Supplement: s1 [file s1]

# Supplementary Materials: Cultural and Ethical Barriers to Cancer Treatment in Nursing Homes and Educational Strategies: A Scoping Review

Cynthia Filteau, Arnaud Simeone, Christine Ravot, David Dayde and Claire Falandry

Table S1. Search strategies for scoping review.

| Database | Number of Studies | Search Query                                                                                                                                                                                                                                                                                                                                                                                                                                                                                                                                                          |
|----------|-------------------|-----------------------------------------------------------------------------------------------------------------------------------------------------------------------------------------------------------------------------------------------------------------------------------------------------------------------------------------------------------------------------------------------------------------------------------------------------------------------------------------------------------------------------------------------------------------------|
| PubMed   | 10                | "Neoplasms/education"[Mesh] OR "Neoplasms"[Mesh]) AND ("Nursing Homes"[Mesh] OR "Homes for the Aged"[Mesh] OR "Assisted Living Facilities"[Mesh]) AND ("Education, Professional"[Mesh] OR "Staff Development"[Mesh] OR "Inservice Training"[Mesh] OR "Health Knowledge, Attitudes, Practice"[Mesh] OR "Health Communication"[Mesh])                                                                                                                                                                                                                                   |
|          | 22                | ("neoplasm" OR "cancer" OR "oncology" OR "chemotherapy") AND ("information" OR "education in cancer" OR "training" OR "inservice training" OR "course" OR "health care communication" OR "improving knowledge") AND (" AND caregiver AND "OR " AND health professionals AND "OR " AND nurse AND "OR " AND staff AND "OR " AND doctor AND ") AND (" AND nursing home AND "OR " AND home hospice AND "OR " AND home care AND "OR " AND hospice care AND "OR " AND homes for the aged AND "OR residential facilities" OR "assisted living facilities" OR "old age home") |
|          | 24                | (((((aged[MeSH Terms]) AND (neoplasms[MeSH Terms]))) AND (nursing homes[MeSH Terms]))) NOT (care, palliative[MeSH Terms])) AND (education)                                                                                                                                                                                                                                                                                                                                                                                                                            |
|          | 190               | (((((aged[MeSH Terms]) AND (neoplasms[MeSH Terms]))) AND (nursing homes[MeSH Terms]))) NOT (care, palliative[MeSH Terms])                                                                                                                                                                                                                                                                                                                                                                                                                                             |
|          | 3                 | ((("continuing education"[Title/Abstract]) AND ("nursing"[Title/Abstract])) AND ("cooperative learning"[Title/Abstract]))                                                                                                                                                                                                                                                                                                                                                                                                                                             |
|          | 12                | ((("continuing education"[Title/Abstract]) AND (nursing[Title/Abstract])) AND (participatory[Title/Abstract]))                                                                                                                                                                                                                                                                                                                                                                                                                                                        |
|          | 2                 | ((("continuing education"[Title/Abstract]) AND ("nursing"[Title/Abstract])) AND (Collaborative learning[Title/Abstract]))                                                                                                                                                                                                                                                                                                                                                                                                                                             |
| Embase   | 238               | 'malignant neoplasm'/exp AND ('home for the aged'/exp OR 'old age homes'/exp OR 'home* for the aged':ti,ab,kw OR 'housing* for the elderly':ti,ab,kw OR 'old age home*':ti,ab,kw OR 'old people home*':ti,ab,kw OR ('aged'/exp AND ('nursing home'/exp OR 'assisted living facility'/exp))) AND [embase]/lim NOT ([embase]/lim AND [medline]/lim)                                                                                                                                                                                                                     |
|          | 28                | 'malignant neoplasm'/exp AND 'aged'/exp AND ('paramedical education'/exp OR 'paramedical education':ti,ab,kw OR 'paramedical training':ti,ab,kw OR 'nurse training':ti,ab,kw OR 'nurse education':ti,ab,kw OR ('continuing education'/exp AND 'paramedical personnel'/exp))                                                                                                                                                                                                                                                                                           |
| CINAHL   | 76                | MH ("neoplasms+") AND ((MH ("housing for the elderly") OR TI ("housing* for the elderly" OR "home* for the aged" OR "old age home*" OR "old people home*") OR AB ("housing* for the elderly" OR "home* for the aged" OR "old age home*" OR "old people home*")) OR (MH ("aged+") AND (MH ("nursing homes+") OR TI ("nursing home*" OR "assisted living facility*") OR AB ("nursing home*" OR "assisted living facility*"))))                                                                                                                                          |
|          | 25                | MH ("neoplasms+" AND "aged+") AND (MH ("education, nursing+" OR "education, allied health+") OR AB ("nursing education" OR "nursing training" OR "paramedical education" OR "paramedical training") OR TI ("nursing education" OR "nursing training" OR "paramedical education" OR "paramedical training") OR (MH ("education, continuing+") AND MH ("Allied health personnel+" OR "nurses+")))                                                                                                                                                                       |

**Table S2.** Preferred Reporting Items for Systematic reviews and Meta-Analyses extension for Scoping Reviews (PRISMA-ScR) Checklist.

| SECTION                   | ITEM | PRISMA-ScR CHECKLIST<br>ITEM                                                                                                                                                                                                                                              | REPORTED ON PAGE #                   |
|---------------------------|------|---------------------------------------------------------------------------------------------------------------------------------------------------------------------------------------------------------------------------------------------------------------------------|--------------------------------------|
| Title                     | 1    | TITLE<br>Identify the report as a scoping review.                                                                                                                                                                                                                         | 1                                    |
| Structured summary        | 2    | ABSTRACT<br>Provide a structured summary that includes (as applicable): background, objectives, eligibility criteria, sources of evidence, charting methods, results, and conclusions that relate to the review questions and objectives.                                 | 2                                    |
| Rationale                 | 3    | INTRODUCTION<br>Describe the rationale for the review in the context of what is already known. Explain why the review questions/objectives lend themselves to a scoping review approach.                                                                                  | 3                                    |
| Objectives                | 4    | Provide an explicit statement of the questions and objectives being addressed with reference to their key elements (e.g., population or participants, concepts, and context) or other relevant key elements used to conceptualize the review questions and/or objectives. | 3                                    |
| Protocol and registration | 5    | METHODS<br>Indicate whether a review protocol exists; state if and where it can be accessed (e.g., a Web address); and if available, provide registration information, including the registration number.                                                                 | 3                                    |
| Eligibility criteria      | 6    | Specify characteristics of the sources of evidence used as eligibility criteria (e.g., years considered, language, and publication status), and provide a rationale.                                                                                                      | 3                                    |
| Information sources*      | 7    | Describe all information sources in the search (e.g., databases with dates of coverage and contact with authors to identify additional sources), as well as the date the most recent search was executed.                                                                 | 3                                    |
| Search                    | 8    | Present the full electronic search strategy for at least 1 database,                                                                                                                                                                                                      | Supplementary materials,<br>Table S1 |

| SECTION                                               | ITEM | PRISMA-ScR CHECKLIST<br>ITEM                                                                                                                                                                                                                                                                                                                                                                                                                                                                      | REPORTED ON PAGE #                             |
|-------------------------------------------------------|------|---------------------------------------------------------------------------------------------------------------------------------------------------------------------------------------------------------------------------------------------------------------------------------------------------------------------------------------------------------------------------------------------------------------------------------------------------------------------------------------------------|------------------------------------------------|
| Selection of sources of evidence†                     | 9    | including any limits used, such that it could be repeated.<br>State the process for selecting sources of evidence (i.e., screening and eligibility) included in the scoping review.<br>Describe the methods of charting data from the included sources of evidence (e.g., calibrated forms or forms that have been tested by the team before their use, and whether data charting was done independently or in duplicate) and any processes for obtaining and confirming data from investigators. | 3                                              |
| Data charting process‡                                | 10   | List and define all variables for which data were sought and any assumptions and simplifications made.                                                                                                                                                                                                                                                                                                                                                                                            | 3                                              |
| Data items                                            | 11   | If done, provide a rationale for conducting a critical appraisal of included sources of evidence; describe the methods used and how this information was used in any data synthesis (if appropriate).                                                                                                                                                                                                                                                                                             | 4                                              |
| Critical appraisal of individual sources of evidence§ | 12   | Describe the methods of handling and summarizing the data that were charted.                                                                                                                                                                                                                                                                                                                                                                                                                      | 4                                              |
| Synthesis of results                                  | 13   | RESULTS                                                                                                                                                                                                                                                                                                                                                                                                                                                                                           | 4                                              |
| Selection of sources of evidence                      | 14   | Give numbers of sources of evidence screened, assessed for eligibility, and included in the review, with reasons for exclusions at each stage, ideally using a flow diagram.                                                                                                                                                                                                                                                                                                                      | 5                                              |
| Characteristics of sources of evidence                | 15   | For each source of evidence, present characteristics for which data were charted and provide the citations.                                                                                                                                                                                                                                                                                                                                                                                       | 5-14 and Supplementary materials, Table S4-S10 |
| Critical appraisal within sources of evidence         | 16   | If done, present data on critical appraisal of included sources of evidence (see item 12).                                                                                                                                                                                                                                                                                                                                                                                                        | Supplementary materials, Table S4-S10          |
| Results of individual sources of evidence             | 17   | For each included source of evidence, present the relevant data that were charted that relate to the review questions and objectives.                                                                                                                                                                                                                                                                                                                                                             | 5-14                                           |
| Synthesis of results                                  | 18   | Summarize and/or present the charting results as they relate to the review questions and objectives.                                                                                                                                                                                                                                                                                                                                                                                              | 5-14                                           |
| DISCUSSION                                            |      |                                                                                                                                                                                                                                                                                                                                                                                                                                                                                                   |                                                |

| SECTION             | ITEM | PRISMA-ScR CHECKLIST<br>ITEM                                                                                                                                                                    | REPORTED ON PAGE # |
|---------------------|------|-------------------------------------------------------------------------------------------------------------------------------------------------------------------------------------------------|--------------------|
| Summary of evidence | 19   | Summarize the main results (including an overview of concepts, themes, and types of evidence available), link to the review questions and objectives, and consider the relevance to key groups. | 14-16              |
| Limitations         | 20   | Discuss the limitations of the scoping review process.                                                                                                                                          | 15-16              |
| Conclusions         | 21   | Provide a general interpretation of the results with respect to the review questions and objectives, as well as potential implications and/or next steps.                                       | 16                 |
| Funding             | 22   | FUNDING<br>Describe sources of funding for the included sources of evidence, as well as sources of funding for the scoping review. Describe the role of the funders of the scoping review.      | 16                 |

**List S3:** All records screened listed, after duplicates removal ( $n = 605$ ).

1. Akdeniz, M.; Hahnel, E.; Ulrich, C.; Blume-Peytavi, U.; Kottner, J. Prevalence and Associated Factors of Skin Cancer in Aged Nursing Home Residents: A Multicenter Prevalence Study. *PLoS ONE* **2019**, *14*, e0215379, doi:10.1371/journal.pone.0215379.
2. Blytt, K.M.; Selbæk, G.; Drageset, J.; Natvig, G.K.; Husebo, B.S. Comorbid Dementia and Cancer in Residents of Nursing Homes: Secondary Analyses of a Cross-Sectional Study. *Cancer Nursing* **2018**, *41*, E13–E20, doi:10.1097/NCC.0000000000000478.
3. Boyd, M.; Frey, R.; Balmer, D.; Robinson, J.; McLeod, H.; Foster, S.; Slark, J.; Gott, M. End of Life Care for Long-Term Care Residents with Dementia, Chronic Illness and Cancer: Prospective Staff Survey. *BMC Geriatr* **2019**, *19*, 137, doi:10.1186/s12877-019-1159-2.
4. Bradley, C.J.; Clement, J.P.; Lin, C. Absence of Cancer Diagnosis and Treatment in Elderly Medicaid-Insured Nursing Home Residents. *JNCI: Journal of the National Cancer Institute* **2008**, *100*, 21–31, doi:10.1093/jnci/djm271.
5. Brink, P. Examining Do-Not-Resuscitate Orders Among Newly Admitted Residents of Long-Term Care Facilities. *Palliat Care* **2014**, *8*, 1–6, doi:10.4137/PCRT.S13042.
6. Buchanan, I.A.; Donoho, D.A.; Patel, A.; Lin, M.; Wen, T.; Ding, L.; Giannotta, S.L.; Mack, W.J.; Attenello, F. Predictors of Surgical Site Infection After Nonemergent Craniotomy: A Nationwide Readmission Database Analysis. *World Neurosurg* **2018**, *120*, e440–e452, doi:10.1016/j.wneu.2018.08.102.
7. Butler, C.C.; Lau, M.; Gillespie, D.; Owen-Jones, E.; Lown, M.; Wootton, M.; Calder, P.C.; Bayer, A.J.; Moore, M.; Little, P.; et al. Effect of Probiotic Use on Antibiotic Administration Among Care Home Residents: A Randomized Clinical Trial. *JAMA* **2020**, *324*, 47–56, doi:10.1001/jama.2020.8556.
8. Chan, T.Y.; Foo, C.C.; Law, W.L.; Lo, O. Outcomes of Colorectal Cancer Surgery in the Nonagenarians: 20-Year Result from a Tertiary Center. *BMC Surg* **2019**, *19*, 155, doi:10.1186/s12893-019-0623-4.
9. Clement, J.P.; Bradley, C.J.; Lin, C. Organizational Characteristics and Cancer Care for Nursing Home Residents. *Health Serv Res* **2009**, *44*, 1983–2003, doi:10.1111/j.1475-6773.2009.01024.x.
10. Dasch, B.; Blum, K.; Gude, P.; Bausewein, C. Place of Death: Trends Over the Course of a Decade: A Population-Based Study of Death Certificates From the Years 2001 and 2011. *Dtsch Arztebl Int* **2015**, *112*, 496–504, doi:10.3238/arztebl.2015.0496.
11. De Gagne, J.C.; Park, H.K.; Hall, K.; Woodward, A.; Yamane, S.; Kim, S.S. Microlearning in Health Professions Education: Scoping Review. *JMIR Med Educ* **2019**, *5*, e13997, doi:10.2196/13997.
12. Drageset, J.; Corbett, A.; Selbaek, G.; Husebo, B.S. Cancer-Related Pain and Symptoms among Nursing Home Residents: A Systematic Review. *J Pain Symptom Manage* **2014**, *48*, 699–710.e1, doi:10.1016/j.jpainsymman.2013.12.238.
13. Drageset, J.; Eide, G.E.; Dysvik, E.; Furnes, B.; Hauge, S. Loneliness, Loss, and Social Support among Cognitively Intact Older People with Cancer, Living in Nursing Homes—a Mixed-Methods Study. *Clin Interv Aging* **2015**, *10*, 1529–1536, doi:10.2147/CIA.S88404.
14. Dubé, C.E.; Mack, D.S.; Hunnicutt, J.N.; Lapane, K.L. Cognitive Impairment and Pain Among Nursing Home Residents With Cancer. *J Pain Symptom Manage* **2018**, *55*, 1509–1518, doi:10.1016/j.jpainsymman.2018.02.012.

15. Dyason, C.; Simon, J.; Wityk Martin, T.L. Advance Care Planning Discussions among Residents of Long Term Care and Designated Assisted Living: Experience from Calgary, Alberta. *BMJ Support Palliat Care* **2015**, *5*, 48–53, doi:10.1136/bmjspcare-2013-000444.
16. Evans, C.J.; Ho, Y.; Daveson, B.A.; Hall, S.; Higginson, I.J.; Gao, W.; GUIDE\_Care project Place and Cause of Death in Centenarians: A Population-Based Observational Study in England, 2001 to 2010. *PLoS Med.* **2014**, *11*, e1001653, doi:10.1371/journal.pmed.1001653.
17. Fennell, M.L. Nursing Homes and Cancer Care. *Health Serv Res* **2009**, *44*, 1927–1932, doi:10.1111/j.1475-6773.2009.01056.x.
18. Finlayson, E.; Zhao, S.; Boscardin, W.J.; Fries, B.E.; Landefeld, C.S.; Dudley, R.A. Functional Status after Colon Cancer Surgery in Elderly Nursing Home Residents. *J Am Geriatr Soc* **2012**, *60*, 967–973, doi:10.1111/j.1532-5415.2012.03915.x.
19. Ghosh, T.; Jandhyala, D.; Bhatti, M.M.; Pritt, B.S. Closing the Brief Case: Crusted Scabies in a Leukemic Patient Following a Stay in a Long-Term Acute Care Facility. *J. Clin. Microbiol.* **2017**, *55*, 1599–1600, doi:10.1128/JCM.02375-16.
20. Ghosh, T.; Jandhyala, D.; Bhatti, M.M.; Pritt, B.S. The Brief Case: Crusted Scabies in a Leukemic Patient Following a Stay in a Long-Term Acute Care Facility. *J. Clin. Microbiol.* **2017**, *55*, 1233–1236, doi:10.1128/JCM.02350-16.
21. Hamaker, M.E.; Hamelinck, V.C.; van Munster, B.C.; Bastiaannet, E.; Smorenburg, C.H.; Achterberg, W.P.; Liefers, G.-J.; de Rooij, S.E. Nonreferral of Nursing Home Patients with Suspected Breast Cancer. *J Am Med Dir Assoc* **2012**, *13*, 464–469, doi:10.1016/j.jamda.2012.01.002.
22. Hibbert, P.D.; Wiles, L.K.; Cameron, I.D.; Kitson, A.; Reed, R.L.; Georgiou, A.; Gray, L.; Westbrook, J.; Augustsson, H.; Molloy, C.J.; et al. CareTrack Aged: The Appropriateness of Care Delivered to Australians Living in Residential Aged Care Facilities: A Study Protocol. *BMJ Open* **2019**, *9*, e030988, doi:10.1136/bmjopen-2019-030988.
23. Hodgson, N.A.; Lehning, A.J. Palliative Care in Nursing Homes: A Comparison of High- and Low-Level Providers. *International Journal of Palliative Nursing* **2008**, *14*, 38–44, doi:10.12968/ijpn.2008.14.1.28152.
24. Hunnicutt, J.N.; Tjia, J.; Lapane, K.L. Hospice Use and Pain Management in Elderly Nursing Home Residents With Cancer. *J Pain Symptom Manage* **2017**, *53*, 561–570, doi:10.1016/j.jpainsymman.2016.10.369.
25. Jeong, B.-H.; Koh, W.-J.; Yoo, H.; Park, H.Y.; Suh, G.Y.; Chung, M.P.; Kwon, O.J.; Jeon, K. Risk Factors for Acquiring Potentially Drug-Resistant Pathogens in Immunocompetent Patients with Pneumonia Developed out of Hospital. *Respiration* **2014**, *88*, 190–198, doi:10.1159/000362673.
26. Jokanovic, N.; Kautiainen, H.; Bell, J.S.; Tan, E.C.K.; Pitkälä, K.H. Change in Prescribing for Secondary Prevention of Stroke and Coronary Heart Disease in Finnish Nursing Homes and Assisted Living Facilities. *Drugs & Aging* **2019**, *36*, 571–579, doi:10.1007/s40266-019-00656-x.
27. Kanapuru, B.; Posani, K.; Muller, D.; Ershler, W.B. Decreased Cancer Prevalence in the Nursing Home. *J Am Geriatr Soc* **2008**, *56*, 2165–2166, doi:10.1111/j.1532-5415.2008.01864.x.
28. Kim, H.S.; Hwang, S.Y.; Oh, E.G.; Lee, J.E. Development and Evaluation of a PBL-based Continuing Education for Clinical Nurses: A Pilot Study. *J Korean Acad Nurs* **2006**, *36*, 1308, doi:10.4040/jkan.2006.36.8.1308.
29. Kiran, T.; Kopp, A.; Glazier, R.H. Those Left Behind From Voluntary Medical Home Reforms in Ontario, Canada. *Ann Fam Med* **2016**, *14*, 517–525, doi:10.1370/afm.2000.
30. Koblicez, V.; Novotna, B.; Zbozinkova, Z.; Hejduk, K. Diagnosing COPD: Advances in Training and Practice &ndash; a Systematic Review. *AMEP* **2016**, *219*, doi:10.2147/AMEP.S76976.
31. Koroukian, S.M.; Xu, F.; Beaird, H.; Diaz, M.; Murray, P.; Rose, J.H. Complexity of Care Needs and Unstaged Cancer in Elders: A Population-Based Study. *Cancer Detect Prev* **2007**, *31*, 199–206, doi:10.1016/j.cdp.2007.04.002.
32. LeBlanc, T.W.; Abernethy, A.P.; Casarett, D.J. What Is Different about Patients with Hematologic Malignancies? A Retrospective Cohort Study of Cancer Patients Referred to a Hospice Research Network. *J Pain Symptom Manage* **2015**, *49*, 505–512, doi:10.1016/j.jpainsymman.2014.07.003.
33. Lewis, M.A.; Kane, R.L.; Cretin, S.; Clark, V. The Immediate and Subsequent Outcomes of Nursing Home Care. *Am J Public Health* **1985**, *75*, 758–762, doi:10.2105/ajph.75.7.758.
34. Mack, D.S.; Epstein, M.M.; Dubé, C.; Clark, R.E.; Lapane, K.L. Screening Mammography among Nursing Home Residents in the United States: Current Guidelines and Practice. *J Geriatr Oncol* **2018**, *9*, 626–634, doi:10.1016/j.jgo.2018.05.005.
35. MacKenzie, M.A.; Buck, H.G.; Meghani, S.H.; Riegel, B. Unique Correlates of Heart Failure and Cancer Caregiver Satisfaction With Hospice Care. *J Pain Symptom Manage* **2016**, *51*, 71–78, doi:10.1016/j.jpainsymman.2015.09.001.
36. Matsumoto, S.; Harada, H.; Tanaka, J.; Ochi, K.; Ishibashi, T.; Takeda, M.; Yoshida, M.; Miyake, H.; Kimura, I. [Aging and exocrine pancreatic function]. *Nihon Ronen Igakkai Zasshi* **1989**, *26*, 146–152, doi:10.3143/geriatrics.26.146.
37. Meier, D.E.; Back, A.L.; Berman, A.; Block, S.D.; Corrigan, J.M.; Morrison, R.S. A National Strategy For Palliative Care. *Health Affairs* **2017**, *36*, 1265–1273, doi:10.1377/hlthaff.2017.0164.
38. Moinpour, C.M.; Polissar, L. Factors Affecting Place of Death of Hospice and Non-Hospice Cancer Patients. *Am J Public Health* **1989**, *79*, 1549–1551, doi:10.2105/ajph.79.11.1549.
39. Monroe, T.B.; Carter, M.A.; Feldt, K.S.; Dietrich, M.S.; Cowan, R.L. Pain and Hospice Care in Nursing Home Residents with Dementia and Terminal Cancer. *Geriatr Gerontol Int* **2013**, *13*, 1018–1025, doi:10.1111/ggi.12049.
40. Monroe, T.; Carter, M.; Feldt, K.; Tolley, B.; Cowan, R.L. Assessing Advanced Cancer Pain in Older Adults with Dementia at the End-of-Life. *J Adv Nurs* **2012**, *68*, 2070–2078, doi:10.1111/j.1365-2648.2011.05929.x.
41. Moore, K.L.; Lewis, C.L.; Zimmerman, S.; Ward, K.; Reed, D.; Rodriguez, R.; Kistler, C.E. A Pilot Study to Examine Colorectal Cancer Screening in Two Assisted Living Communities. *J Am Geriatr Soc* **2014**, *62*, 386–388, doi:10.1111/jgs.12665.

42. Murakami, M.; Ono, K.; Tsubokura, M.; Nomura, S.; Oikawa, T.; Oka, T.; Kami, M.; Oki, T. Was the Risk from Nursing-Home Evacuation after the Fukushima Accident Higher than the Radiation Risk? *PLoS ONE* **2015**, *10*, e0137906, doi:10.1371/journal.pone.0137906.
43. Murray, K.S.; Prunty, M.; Henderson, A.; Haden, T.; Pokala, N.; Ge, B.; Wakefield, M.; Petroski, G.F.; Mehr, D.R.; Kruse, R.L. Functional Status in Patients Requiring Nursing Home Stay After Radical Cystectomy. *Urology* **2018**, *121*, 39–43, doi:10.1016/j.urology.2018.07.030.
44. Murthy, S.B.; Shastri, A.; Merkler, A.E.; Hanley, D.F.; Ziai, W.C.; Fink, M.E.; Iadecola, C.; Kamel, H.; Navi, B.B. Intracerebral Hemorrhage Outcomes in Patients with Systemic Cancer. *J Stroke Cerebrovasc Dis* **2016**, *25*, 2918–2924, doi:10.1016/j.jstroke-cerebrovasdis.2016.08.006.
45. Muss, H.B. Adjuvant Chemotherapy in Older and Younger Women With Lymph Node-Positive Breast Cancer. *JAMA* **2005**, *293*, 1073, doi:10.1001/jama.293.9.1073.
46. Paredes, A.Z.; Hyer, J.M.; Beal, E.W.; Bagante, F.; Merath, K.; Mehta, R.; White, S.; Pawlik, T.M. Impact of Skilled Nursing Facility Quality on Postoperative Outcomes after Pancreatic Surgery. *Surgery* **2019**, *166*, 1–7, doi:10.1016/j.surg.2018.12.008.
47. Pimentel, C.B.; Briesacher, B.A.; Gurwitz, J.H.; Rosen, A.B.; Pimentel, M.T.; Lapane, K.L. Pain Management in Nursing Home Residents with Cancer. *J Am Geriatr Soc* **2015**, *63*, 633–641, doi:10.1111/jgs.13345.
48. Porock, D.; Oliver, D.P.; Zweig, S.; Rantz, M.; Mehr, D.; Madsen, R.; Petroski, G. Predicting Death in the Nursing Home: Development and Validation of the 6-Month Minimum Data Set Mortality Risk Index. *J. Gerontol. A Biol. Sci. Med. Sci.* **2005**, *60*, 491–498, doi:10.1093/gerona/60.4.491.
49. Qanbari Qalehsari, M.; Khaghanizadeh, M.; Ebadi, A. Lifelong Learning Strategies in Nursing: A Systematic Review. *Electron Physician* **2017**, *9*, 5541–5550, doi:10.19082/5541.
50. Roxby, A.C.; Greninger, A.L.; Hatfield, K.M.; Lynch, J.B.; Dellit, T.H.; James, A.; Taylor, J.; Page, L.C.; Kimball, A.; Arons, M.; et al. Outbreak Investigation of COVID-19 Among Residents and Staff of an Independent and Assisted Living Community for Older Adults in Seattle, Washington. *JAMA Intern Med* **2020**, *180*, 1101–1105, doi:10.1001/jamainternmed.2020.2233.
51. Scholtes, C.; Baust, K.; Weinhold, L.; Creutzig, U.; Gnekow, A.; Hinz, A.; Kaatsch, P.; Kreitz, K.; Langer, T.; Rutkowski, S.; et al. Health Status, Health-Related Quality of Life, and Socioeconomic Outcome in Childhood Brain Tumor Survivors: A German Cohort Study. *Neuro Oncol* **2019**, *21*, 1069–1081, doi:10.1093/neuonc/noz044.
52. Shah, B.C.; Ullrich, F.; Smith, L.; Leiphrakpam, P.; Ly, Q.; Sasson, A.; Are, C. National Trends in Discharge Disposition after Hepatic Resection for Malignancy. *HPB (Oxford)* **2011**, *13*, 96–102, doi:10.1111/j.1477-2574.2010.00251.x.
53. Shugarman, L.R.; Bird, C.E.; Schuster, C.R.; Lynn, J. Age and Gender Differences in Medicare Expenditures and Service Utilization at the End of Life for Lung Cancer Decedents. *Womens Health Issues* **2008**, *18*, 199–209, doi:10.1016/j.whi.2008.02.008.
54. Silver, S.A.; Harel, Z.; McArthur, E.; Nash, D.M.; Acedillo, R.; Kitchlu, A.; Garg, A.X.; Chertow, G.M.; Bell, C.M.; Wald, R. Causes of Death after a Hospitalization with AKI. *J Am Soc Nephrol* **2018**, *29*, 1001–1010, doi:10.1681/ASN.2017080882.
55. Smith, A.K.; Lo, B.; Sudore, R. When Previously Expressed Wishes Conflict with Best Interests. *JAMA Intern Med* **2013**, *173*, 1241–1245, doi:10.1001/jamainternmed.2013.6053.
56. Sommerbakk, R.; Haugen, D.F.; Tjora, A.; Kaasa, S.; Hjermstad, M.J. Barriers to and Facilitators for Implementing Quality Improvements in Palliative Care - Results from a Qualitative Interview Study in Norway. *BMC Palliat Care* **2016**, *15*, 61, doi:10.1186/s12904-016-0132-5.
57. Tang, V.; Zhao, S.; Boscardin, J.; Sudore, R.; Covinsky, K.; Walter, L.C.; Esserman, L.; Mukhtar, R.; Finlayson, E. Functional Status and Survival After Breast Cancer Surgery in Nursing Home Residents. *JAMA Surg* **2018**, *153*, 1090–1096, doi:10.1001/jamasurg.2018.2736.
58. Temkin-Greener, H.; Zheng, N.T.; Xing, J.; Mukamel, D.B. Site of Death among Nursing Home Residents in the United States: Changing Patterns, 2003–2007. *J Am Med Dir Assoc* **2013**, *14*, 741–748, doi:10.1016/j.jamda.2013.03.009.
59. Thomas, K.S.; Boyd, E.; Mariotto, A.B.; Penn, D.C.; Barrett, M.J.; Warren, J.L. New Opportunities for Cancer Health Services Research: Linking the SEER-Medicare Data to the Nursing Home Minimum Data Set. *Med Care* **2018**, *56*, e90–e96, doi:10.1097/MLR.0000000000000877.
60. Tschirhart, E.C.; Du, Q.; Kelley, A.S. Factors Influencing the Use of Intensive Procedures at the End of Life. *J Am Geriatr Soc* **2014**, *62*, 2088–2094, doi:10.1111/jgs.13104.
61. Tuberculosis and Chest Service, Centre for Health Protection, Department of Health, Hong Kong; Leung, E.C.; Leung, C.; Chang, K.; Chan, C.; Mok, T.Y.; Chan, K.; Lau, K.; Chau, C.; Yee, W.K.; et al. Delayed Diagnosis of Tuberculosis: Risk Factors and Effect on Mortality among Older Adults in Hong Kong. *Hong Kong Med J* **2018**, doi:10.12809/hkmj177081.
62. Unroe, K.T.; Sachs, G.A.; Dennis, M.E.; Hickman, S.E.; Stump, T.E.; Tu, W.; Callahan, C.M. Effect of Hospice Use on Costs of Care for Long-Stay Nursing Home Decedents. *J Am Geriatr Soc* **2016**, *64*, 723–730, doi:10.1111/jgs.14070.
63. Van Cleave, J.H.; Egleston, B.L.; Abbott, K.M.; Hirschman, K.B.; Rao, A.; Naylor, M.D. Multiple Chronic Conditions and Hospitalizations Among Recipients of Long-Term Services and Supports: *Nursing Research* **2016**, *65*, 425–434, doi:10.1097/NNR.0000000000000185.
64. Van Rensbergen, G.; Nawrot, T.S.; Van Hecke, E.; Nemery, B. Where Do the Elderly Die? The Impact of Nursing Home Utilisation on the Place of Death. Observations from a Mortality Cohort Study in Flanders. *BMC Public Health* **2006**, *6*, 178, doi:10.1186/1471-2458-6-178.
65. Walter, L.C.; Eng, C.; Covinsky, K.E. Screening Mammography for Frail Older Women: What Are the Burdens? *J Gen Intern Med* **2001**, *16*, 779–784, doi:10.1111/j.1525-1497.2001.10113.x.

66. Whitley, R.J.; Monto, A.S. Prevention and Treatment of Influenza in High-Risk Groups: Children, Pregnant Women, Immuno-compromised Hosts, and Nursing Home Residents. *J. Infect. Dis.* **2006**, *194* Suppl 2, S133–138, doi:10.1086/507548.
67. Zueger, P.M.; Holmes, H.M.; Calip, G.S.; Qato, D.M.; Pickard, A.S.; Lee, T.A. Older Medicare Beneficiaries Frequently Continue Medications with Limited Benefit Following Hospice Admission. *J Gen Intern Med* **2019**, *34*, 2029–2037, doi:10.1007/s11606-019-05152-x.
68. Aangenendt-Siegers, I.P.; Cools, H.J. [Cause of death in nursing homes]. *Ned Tijdschr Geneesk* **1992**, *136*, 2015–2017.
69. Aberger, K.; Trtchounian, A.; DiPasquale, I.; Nelson, J.W. Early Palliative Care Consultation Decreases Length of Stay. *J. Palliative Med.* **2018**, *21*, A31, doi:10.1089/jpm.2018.29007.abstract.
70. Acher, A.W.; Squires, M.H.; Fields, R.C.; Poultides, G.A.; Schmidt, C.; Votanopoulos, K.I.; Pawlik, T.M.; Jin, L.X.; Ejaz, A.; Kooby, D.A.; et al. Can the Risk of Non-Home Discharge after Resection of Gastric Adenocarcinoma Be Predicted: A Seven-Institution Study of the US Gastric Cancer Collaborative. *J. Gastrointest. Surg.* **2015**, *19*, 207–216, doi:10.1007/s11605-014-2690-2.
71. Ahonen, A.; Penttilä, A. Mortality and Autopsy Rate for Gastrointestinal Diseases in Finland in 1955–1973. *Scand J Gastroenterol* **1979**, *14*, 721–728, doi:10.3109/00365527909181944.
72. Akindele, A.; Lazar, P. Hypercalcemia of Undetermined Origin or Possibly Multifactorial. *J. Am. Geriatr. Soc.* **2017**, *65*, S193, doi:10.1111/imj.13426.
73. Alexander, K.; Shahrokni, A.; Mahmoudzadeh Pournaki, S.; Korc-Grodzicki, B. Skilled Care Utilization after Abdominal Cancer Surgery in Older Patients. *J. Am. Geriatr. Soc.* **2015**, *63*, S89, doi:10.1111/jgs.13439.
74. Alhelih, E.M.; Baker, O.G.; Almomani, S.A.; Baker, B.G. CANCER TREATMENT - RELATED SYMPTOMS AGGREGATION AND DISTRIBUTION AMONG SAUDI CHILDREN WITH CANCER. *Middle East Journal of Nursing* **2018**, *12*, 14–31, doi:10.5742/MEJN.2018.93393.
75. Alikhan, M.A.; Limesand, D.L.; Schmelzel, M.; McGlone, T.; Powers, D.; Khawaja, O.; Johnson, R.F.; Pikul, F. Management of Octogenarians with Female Breast Cancer in a Rural Oncology Program. *J. Clin. Oncol.* **2012**, *30*.
76. Aliyu, S.; Cohen, B.; Liu, J.; Larson, E. Prevalence and Risk Factors for Bloodstream Infection Present on Hospital Admission. *Journal of Infection Prevention* **2018**, *19*, 37–42, doi:10.1177/1757177417720998.
77. Altieri, C. Success of a Home-Based Oncology Rehabilitation Program for a Geriatric Patient Living in an Assisted Living Facility: A Case Report. *Rehabilitation Oncology* **2012**, *30*, 8–12.
78. Aly, A.; Singh, P.; Korytowsky, B.; Ling, Y.-L.; Kale, H.P.; Dastani, H.B.; Botteman, M.F.; Norden, A.D. Survival, Costs, and Health Care Resource Use by Line of Therapy in US Medicare Patients with Newly Diagnosed Glioblastoma: A Retrospective Observational Study. *Neuro-Oncol. Pract.* **2020**, *7*, 164–175, doi:10.1093/nop/npz042.
79. Andershed, B.; Ternstedt, B.M. Involvement of Relatives in Care of the Dying in Different Care Cultures: Development of a Theoretical Understanding. *Nurs Sci Q* **1999**, *12*, 45–51, doi:10.1177/08943189922106404.
80. Ankrett VO; Williams I Basal Cell Carcinoma. Update **2004**, *68*, 456–456.
81. Arao, Y.; Sasabe, M.; Yamada, Y.; Motoyama, Y.; Morita, K.; Kawazoe, M.; Ono, Y. [A consideration of the support for terminal care at the private skilled nursing home]. *Gan To Kagaku Ryoho* **2009**, *36* Suppl 1, 42–44.
82. Argote, J.A. Patient with Myeloma Who Develops Thrombotic Microangiopathy without Hemolysis. *Blood* **2018**, *132*, doi:10.1182/blood-2018-99-117095.
83. Aslam, N.; Ali, M.U.; Rai, M. Candida Lambica; an Exceptional and Rare Fungal Infection. *J. Gen. Intern. Med.* **2020**, *35*, S419, doi:10.1007/s11606-020-05890-3.
84. Astuti, T.; Rochani, N.S.; Amrihati, E.T.; Rochimiawati, S.N.; Bustos, A.R. Snack-Based Pury, Safe and Beneficial to Maintain the Lipid Profile in Elderly. *Ann. Trop. Med. Public Health* **2020**, *23*, 1301–1308, doi:10.36295/ASRO.2020.23817.
85. Au, T.-Y. Perceived Stress, Spirituality, Resourcefulness and Sexuality in Patients with Rectal Cancer Undergoing Cancer Treatment., Case Western Reserve University, 2009.
86. Axelsson, B.; Christensen, S.B. Place of Death Correlated to Sociodemographic Factors. A Study of 203 Patients Dying of Cancer in a Rural Swedish County in 1990. *Palliat Med* **1996**, *10*, 329–335, doi:10.1177/026921639601000409.
87. Aydoğdu, N.; Çapık, C.; Ersin, F.; Kissal, A.; Bahar, Z. The Reliability and Validity of Prostate Cancer Fatalism Inventory in Turkish Language. *Journal of Religion & Health* **2017**, *56*, 1670–1682, doi:10.1007/s10943-016-0302-z.
88. Baali, N. Dermatology in Retirement Homes in Morocco. *J. Dermatol. Nurses' Assoc.* **2020**, *12*.
89. Bach, L.E.; Mortimer, J.A.; VandeWeerd, C.; Corvin, J. The Association of Physical and Mental Health with Sexual Activity in Older Adults in a Retirement Community. *J Sex Med* **2013**, *10*, 2671–2678, doi:10.1111/jsm.12308.
90. Badgwell, B.; Stanley, J.; Chang, G.J.; Katz, M.H.G.; Lin, H.Y.; Ning, J.; Klimberg, S.V.; Cormier, J.N. Comprehensive Geriatric Assessment of Risk Factors Associated with Adverse Outcomes and Resource Utilization in Cancer Patients Undergoing Abdominal Surgery. *J Surg Oncol* **2013**, *108*, 182–186, doi:10.1002/jso.23369.
91. Bagheri, I.; Shan, Y.; Klaassen, Z.; Kamat, A.M.; Konety, B.; Mehta, H.B.; Baillargeon, J.G.; Srinivas, S.; Tyler, D.S.; Swanson, T.A.; et al. Comparing Costs of Radical Versus Partial Cystectomy for Patients Diagnosed with Localized Muscle-Invasive Bladder Cancer: Understanding the Value of Surgical Care. *Urol. Oncol. Semin. Orig. Invest.* **2020**, *38*, 903, doi:10.1016/j.urolonc.2020.10.044.
92. Bahl, A.; Hoefeler, H.; Duran, I.; Hechmati, G.; Garzon-Rodriguez, C.; Ashcroft, J.; Lorusso, V.; Ghelani, P.; Wei, R.; Thomas, E.; et al. Health Resource Utilization Associated with Skeletal-Related Events in Patients with Advanced Prostate Cancer: A European Subgroup Analysis from an Observational, Multinational Study. *J. Clin. Med.* **2014**, *3*, 883–896, doi:10.3390/jcm3030883.

93. Bai, Q.; Zhang, Z.; Lu, X.; Shi, Y.; Liu, X.; Chan, H. Attitudes towards Palliative Care among Patients and Health Professionals in Henan, China. *Prog. Palliative Care* **2010**, *18*, 341–345, doi:10.1179/1743291X10Y.0000000006.
94. Bainbridge, D.; Seow, H.; Sussman, J.; Pond, G. Factors Associated with Acute Care Use among Nursing Home Residents Dying of Cancer: A Population-Based Study. *Int J Palliat Nurs* **2015**, *21*, 349–356, doi:10.12968/ijpn.2015.21.7.349.
95. Bakker, D.; Butler, L.; Fitch, M.; Green, E.; Olson, K.; Cummings, G. Canadian Cancer Nurses' Views on Recruitment and Retention. *J Nurs Manag* **2010**, *18*, 205–214, doi:10.1111/j.1365-2834.2009.01029.x.
96. Baldwin, K.M.; Katz, S.C.; Suarez, L.; Somasundar, P. Laparoscopic Colon Cancer Surgery in the Elderly: Results Are Similar to Those of Younger Patients. *Ann. Surg. Oncol.* **2012**, *19*, S108, doi:10.1245/s10434-012-2244-3.
97. Barber-Madden, R.; Glanz, K. Participatory Learning in Continuing Nursing Education: Soviet Edition of a Public Health and Medicine Trivia Game. *J Contin Educ Nurs* **1989**, *20*, 128–131.
98. Barchi, F.; Kasimatis Singleton, M.; Magama, M.; Shaibu, S. Building Locally Relevant Ethics Curricula for Nursing Education in Botswana. *International Nursing Review* **2014**, *61*, 491–498, doi:10.1111/inr.12138.
99. Barckley, V. Cancer Consultant to Nursing Homes. *Am J Nurs* **1970**, *70*, 804–806.
100. Bashari, D.R.; Iofel, Y. Ceftriaxone-Induced Immune Hemolytic Anemia in a Nonagenarian Identified at a Skilled Nursing Facility. *Ann. Long-Term Care* **2017**, *25*, 33–37, doi:10.25270/altc.2017.10.00011.
101. Bass, E.; French, D.D.; Bradham, D.D. A National Perspective of Medicare Expenditures for Elderly Veterans with Hip Fractures. *J Am Med Dir Assoc* **2008**, *9*, 114–119, doi:10.1016/j.jamda.2007.10.001.
102. Bassett, S.D.; Smyer, T. Health Screening Practices in Rural Long-Term Care Facilities. *J Gerontol Nurs* **2003**, *29*, 42–49, doi:10.3928/0098-9134-20030401-10.
103. Bastiaannet, E.; Hamaker, M.E.; Hamelinck, V.C.; Van Munster, B.C.; Achterberg, W.P.; Liefers, G.J.; Smorenburg, C.H.; De Rooij, S.E. Referral Patterns for Older Patients with Suspected Breast Cancer in Nursing Homes. *Eur. J. Cancer* **2012**, *48*, S66.
104. Bates, B.E.; Kwong, P.L.; Xie, D.; Valimahomed, A.; Ripley, D.C.; Kurichi, J.E.; Stineman, M.G. Factors Influencing Receipt of Early Rehabilitation after Stroke. *Arch Phys Med Rehabil* **2013**, *94*, 2349–2356, doi:10.1016/j.apmr.2013.07.021.
105. Bayer, V.; Amaya, B.; Baniewicz, D.; Callahan, C.; Marsh, L.; McCoy, A.S. Cancer Immunotherapy: An Evidence-Based Overview and Implications for Practice. *Clin J Oncol Nurs* **2017**, *21*, 13–21, doi:10.1188/17.CJON.S2.13-21.
106. Bensted, K.; Vadali, N.; Freiman, J. Advanced Care Planning and Impact of Palliative Care on Patients with Cirrhosis and Hepatocellular Carcinoma. *J. Gastroenterol. Hepatol.* **2018**, *33*, 35, doi:10.1111/jgh.14393.
107. Berger-Höger, B.; Liethmann, K.; Mühlhauser, I.; Steckelberg, A. Implementation of Shared Decision-Making in Oncology: Development and Pilot Study of a Nurse-Led Decision-Coaching Programme for Women with Ductal Carcinoma in Situ. *BMC Med Inform Decis Mak* **2017**, *17*, 160, doi:10.1186/s12911-017-0548-8.
108. Bergevin, R.C. Old Willie. *J Gerontol Nurs* **2005**, *31*, 60, doi:10.3928/0098-9134-20050201-12.
109. Bern-Klug, M.; Singh, J.; Liu, J.; Shinkunas, L. Prospect Theory Concepts Applied to Family Members of Nursing Home Residents with Cancer: A Good Ending Is a Gain. *J Soc Work End Life Palliat Care* **2019**, *15*, 34–54, doi:10.1080/15524256.2019.1580242.
110. Berry, P.H. The Pain of Residents with Terminal Cancer in USA Nursing Homes: Family Members' Perspectives. *Int J Palliat Nurs* **2007**, *13*, 20–27, doi:10.12968/ijpn.2007.13.1.22777.
111. Berwick, M.; Oliveria, S.; Luo, S.-T.; Headley, A.; Bolognia, J.L. A Pilot Study Using Nurse Education as an Intervention to Increase Skin Self-Examination for Melanoma. *J. Cancer Educ.* **2000**, *15*, 38–40.
112. Bhagat, R.; Bronsert, M.R.; Henderson, W.G.; Scott, C.D.; Weyant, M.J.; Mitchell, J.D.; Fullerton, D.A.; Meguid, R.A. Analysis of Discharge Destination After Open Versus Minimally Invasive Surgery for Lung Cancer. *Ann Thorac Surg* **2020**, *109*, 375–382, doi:10.1016/j.athoracsur.2019.08.059.
113. Billmeier, S.E.; Ayanian, J.Z.; He, Y.; Jaklitsch, M.T.; Rogers, S.O. Predictors of Nursing Home Admission, Severe Functional Impairment, or Death One Year after Surgery for Non-Small Cell Lung Cancer. *Ann. Surg.* **2013**, *257*, 555–563, doi:10.1097/SLA.0b013e31828353af.
114. Blanař, V.; Hödl, M.; Lohrmann, C.; Amir, Y.; Eglseer, D. Dysphagia and Factors Associated with Malnutrition Risk: A 5-year Multicentre Study. *Journal of Advanced Nursing (John Wiley & Sons, Inc.)* **2019**, *75*, 3566–3576, doi:10.1111/jan.14188.
115. Bliss, M.; Jordan, P. Long-Term Care a Priority Issue for Patients with Cancer. *ONS News* **1993**, *8*, 6.
116. Boland, A.; Haycox, A.; Bagust, A.; Fitzsimmons, L. A Randomised Controlled Trial to Evaluate the Clinical and Cost-Effectiveness of Hickman Line Insertions in Adult Cancer Patients by Nurses. *Health Technol. Assess.* **2003**, *7*, doi:10.3310/hta7360.
117. Boorsma, M.; Joling, K.; Dussel, M.; Ribbe, M.; Frijters, D.; van Marwijk, H.W.J.; Nijpels, G.; van Hout, H. The Incidence of Depression and Its Risk Factors in Dutch Nursing Homes and Residential Care Homes. *The American Journal of Geriatric Psychiatry* **2012**, *20*, 932–942, doi:10.1097/JGP.0b013e31825d08ac.
118. Bosworth, H.B.; Bastian, L.A.; Siegler, I.C. Benefits and Drawbacks to Hormone Replacement Therapy among Nursing Home Patients. *Womens Health Issues* **1998**, *8*, 53–59, doi:10.1016/s1049-3867(97)00094-7.
119. Bouëté, G.; Esvan, M.; Apel, K.; Thibault, R. THE SELF-EVALUATION OF FOOD INTAKE (SEFI®) AS A SCREENING TEST FOR MALNUTRITION IN GENERAL PRACTICE: PROSPECTIVE NON-INTERVENTIONAL MULTICENTER STUDY. *Clin. Nutr.* **2019**, *38*, S21, doi:10.1016/S0261-5614(19)32516-6.
120. Bourbonniere, M.; Van Cleave, J.H. Cancer Care in Nursing Homes. *Semin Oncol Nurs* **2006**, *22*, 51–57, doi:10.1016/j.soncn.2005.10.007.



121. Bradley, J.P. A Descriptive Survey of Skin Cancer in a Geriatric Centre 1988–1989. *Aust Fam Physician* **1991**, *20*, 1461, 1464, 1467–1468.
122. Brechtelsbauer D Lessons Learned from an Old Acquaintance. *Caring for the Ages* **2006**, *7*, 6–7, doi:10.1016/s1526-4114(06)60319-3.
123. Breuer, B.; Anderson, R. The Relationship of Tamoxifen with Dementia, Depression, and Dependence in Activities of Daily Living in Elderly Nursing Home Residents. *Women Health* **2000**, *31*, 71–85, doi:10.1300/J013v31n01\_05.
124. Breuer, B.; Subramaniam, G.; Marchello, V.; Giambanco, V. A Study of the Effects of Tamoxifen in the Frail Elderly: Difficulties Encountered in Nursing Home Research. *Women Health* **1997**, *25*, 37–51, doi:10.1300/J013v25n01\_03.
125. Buchanan, R.J.; Barkley, J.; Wang, S.; Kim, M. Analyses of Nursing Home Residents with Cancer at Admission. *Cancer Nurs* **2005**, *28*, 406–414, doi:10.1097/00002820-200509000-00012.
126. Burgess, C.; Teasdale, E.; Omar, L.; Tucker, L.; Ramirez, A.-J. Training Radiographers to Deliver an Intervention to Promote Early Presentation of Breast Cancer. *Radiography* **2012**, *18*, 232–237, doi:10.1016/j.radi.2012.06.003.
127. Burguete, D.; Mokdad, A.A.; Augustine, M.M.; Minter, R.; Mansour, J.C.; Choti, M.A.; Polanco, P.M. Non-Home Discharge and Prolonged Length of Stay After Cytoreductive Surgery and HIPEC. *J Surg Res* **2019**, *233*, 360–367, doi:10.1016/j.jss.2018.08.018.
128. Burns, B.C. Oral Care for Older People in Residential. *Nursing & Residential Care* **2012**, *14*, 26–31.
129. Cagle, J.G.; Lee, J.; Ornstein, K.A.; Guralnik, J.M. Hospice Utilization in the United States: A Prospective Cohort Study Comparing Cancer and Noncancer Deaths. *Journal of the American Geriatrics Society* **2020**, *68*, 783–793, doi:10.1111/jgs.16294.
130. Campbell, K. Leukaemia. Knowledge for Practice (Continuing Education Credit). *Nurs Times* **1997**, *93*, suppl 1–4.
131. Campbell, S.M.; Louie-Gao, Q.; Hession, M.L.; Bailey, E.; Geller, A.C.; Cummins, D. Skin Cancer Education among Massage Therapists: A Survey at the 2010 Meeting of the American Massage Therapy Association. *Journal of Cancer Education* **2013**, *28*, 158–164, doi:10.1007/s13187-012-0403-7.
132. Caranasos, G.J. Prevalence of Cancer in Older Persons Living at Home and in Institutions. *Clin. Geriatr. Med.* **1997**, *13*, 15–31.
133. Carethers, J.M. Potential Insights into COVID-19 Disparities from the Science of Cancer Health Disparities. *Clin. Cancer Res.* **2020**, *26*, doi:10.1158/1557-3265.COVID-19-IA20.
134. Carpenter Joan G; Berry Patricia H. Refractory Cancer Pain in a Nursing Home Resident. *Journal of Hospice & Palliative Nursing* **2012**, *14*, 516–523, doi:10.1097/njh.0b013e318273b983.
135. Caucat, M.; Zacarin, A.; Rousseau, V.; Montastruc, J.-L.; Bagheri, H. The Cost of Potentially Inappropriate Medications in Nursing Homes in West Occitanie. *Pharm.* **2020**, *8*, doi:10.3390/pharmacy8010039.
136. Cavalieri, T.A. Pain Management at the End of Life. *Clin. Geriatr.* **2005**, *13*, 44–52.
137. Cha, E.; Kim, J.; Sohn, M.K.; Lee, B.S.; Jung, S.S.; Lee, S.; Lee, I. Perceptions on Good-Life, Good-Death, and Advance Care Planning in Koreans with Non-Cancerous Chronic Diseases. *J Adv Nurs* **2021**, *77*, 889–898, doi:10.1111/jan.14633.
138. Chan-Yeung, M.; Cheung, A.H.K.; Dai, D.L.K.; Chan, F.H.W.; Kam, K.M.; Tam, C.M.; Leung, C.C. Prevalence and Determinants of Positive Tuberculin Reactions of Residents in Old Age Homes in Hong Kong. *Int J Tuberc Lung Dis* **2006**, *10*, 892–898.
139. Chang, B. A Rare Case of Lymphoma. *J. Gen. Intern. Med.* **2017**, *32*, S416.
140. Chang, Y.-L.; Tsai, Y.-F.; Hsu, C.-L.; Chao, Y.-K.; Hsu, C.-C.; Lin, K.-C. The Effectiveness of a Nurse-Led Exercise and Health Education Informatics Program on Exercise Capacity and Quality of Life among Cancer Survivors after Esophagectomy: A Randomized Controlled Trial. *International Journal of Nursing Studies* **2020**, *101*, N.PAG-N.PAG, doi:10.1016/j.ijnurstu.2019.103418.
141. Chauncey, H.H.; House, J.E. Dental Problems in the Elderly. *Hosp Pract* **1977**, *12*, 81–86, doi:10.1080/21548331.1977.11707244.
142. Chen, J.C.Y.; Thorsteinsdottir, B.; Williams, A.W.; Feely, M.; Hickson, L.T. Death and Hemodialysis Withdrawal in Incident Dialysis Patients. *Hemodial. Int.* **2017**, *21*, A13, doi:10.1111/hdi.12520.
143. Cheng, E.; Thorpe, E.; Borrowdale, R. Spinal Epidural Abscess Following Glossectomy and Neck Dissection: A Case Report. *Int. J. Surg. Case Rep.* **2016**, *20*, 33–36, doi:10.1016/j.ijscr.2016.01.004.
144. Cheng, H.Y.; Tonorezos, E.; Zorowitz, R.; Novotny, J.; Dubin, S.; Maurer, M.S. Inpatient Care for Nursing Home Patients: An Opportunity to Improve Transitional Care. *J Am Med Dir Assoc* **2006**, *7*, 383–387, doi:10.1016/j.jamda.2006.01.025.
145. Chesterman, T.; Zimmermann, A.; Mah, P.M.; Vora, P. Profound Hypocalcaemia Following Denosumab for Metastatic Prostate Carcinoma; An under-Recognised and Potentially Fatal Complication. *Clin. Endocrinol.* **2018**, *89*, 91–92.
146. Chini, C.; Nigro, O.; Giaquinto, A.; Magni, E.; Tinelli, G.; Bascialla, L.; Gobba, S.; Pinotti, G. Homcology: Home Chemotherapy Delivery in a Simultaneous Care Project for Frail Advanced Cancer Patients. *Ann. Oncol.* **2019**, *30*, v728–v729, doi:10.1093/annonc/mdz265.032.
147. Choi, N.G.; DiNitto, D.M.; Marti, C.N.; Conwell, Y. Physical Health Problems as a Late-Life Suicide Precipitant: Examination of Coroner/Medical Examiner and Law Enforcement Reports. *Gerontologist* **2019**, *59*, 356–367, doi:10.1093/geront/gnx143.
148. Cholaneril, G.; Hu, M.; Tanner, E.; Cholaneril, R.; Reha, J.; Somasundar, P. Skilled Nursing Facility Placement in Hospitalized Elderly Patients with Colon Cancer. *Eur J Surg Oncol* **2016**, *42*, 1660–1666, doi:10.1016/j.ejso.2016.06.005.
149. Christos PJ; Oliveria SA; Mâsse LC; McCormick LK; Halpern AC Skin Cancer Prevention and Detection by Nurses: Attitudes, Perceptions, and Barriers. *Journal of Cancer Education* **2004**, *19*, 50–57, doi:10.1207/s15430154jce1901\_12.
150. Clark, M.; Julmisse, M.; Marcelin, N.; Merry, L.; Tuck, J.; Gagnon, A.J. Strengthening Healthcare Delivery in Haiti through Nursing Continuing Education. *Int Nurs Rev* **2015**, *62*, 54–63, doi:10.1111/inr.12165.
151. Coghill, A.S. Care Coordination Helps Older Adults with Cancer Continue to Live Life to the Fullest. *ONS Connect* **2014**, *29*, 24–28.

152. Cohen, A.C.; Davidson, N.; Scharf, J.; Middlebrook, D. Cost Burden Analysis of Ineffective Induction Chemotherapy in Elderly Patients with AML. *Blood* **2009**, *114*.
153. Coleman EA; Stewart CB; Wilson S; Cantrell MJ; O'Sullivan P; Carthron DO; Wood LC An Evaluation of Standardized Patients in Improving Clinical Breast Examinations for Military Women. *Cancer Nursing* **2004**, *27*, 474–482.
154. Coleman, J.; Levy, J.; Wiggins, S.; Kinley, J. Using a New End-of-Life Care Plan in Nursing Homes. *Nursing & Residential Care* **2017**, *19*, 38–41, doi:10.12968/nrec.2017.19.1.38.
155. Cooper, G.S.; Xu, F.; Koroukian, S.; Barnholtz-Sloan, J.; Schluchter, M. Colorectal Cancer Diagnosis without Colonoscopy: Frequency and Predictive Factors. *Gastroenterology* **2010**, *138*, S187.
156. Corica, T.; Joseph, D.; Saunders, C.; Bulsara, M.; Nowak, A.K. Intraoperative Radiotherapy for Early Breast Cancer: Do Health Professionals Choose Convenience or Risk? *Radiat. Oncol.* **2014**, *9*, doi:10.1186/1748-717X-9-33.
157. Cornwell, L.B.; Bratslavsky, G.; Ginzburg, N. Factors Associated with Length of Stay and Discharge Disposition for Elective Bladder Cancer Surgical Admissions: A SPARCS Analysis. *Can. Urol. Assoc. J.* **2018**, *12*, S221, doi:10.5489/cuaj.5656.
158. Corona, G.; Dinardo, F.; Bochicchio, G.B. Home Placement of PICCs and Midlines in Patients over Eighty Years Old. A Three-Year Experience. *Nutritional Therapy & Metabolism* **2011**, *29*, 139–144.
159. Corrao, S.; Santalucia, P.; Argano, C.; Djade, C.D.; Barone, E.; Tettamanti, M.; Pasina, L.; Franchi, C.; Kamal Eldin, T.; Marengoni, A.; et al. *Gender-Differences in Disease Distribution and Outcome in Hospitalized Elderly: Data from the REPOSI Study*. *Eur. J. Intern. Med.* **2014**, *25*, 617–623, doi:10.1016/j.ejim.2014.06.027.
160. Costello, J. Research Roundup. *International Journal of Palliative Nursing* **2017**, *23*, 100–101, doi:10.12968/ijpn.2017.23.2.100.
161. Custers, A.F.J.; Cillessen, A.H.J.; Westerhof, G.J.; Kuin, Y.; Riksen-Walraven, J.M. Need Fulfillment, Need Importance, and Depressive Symptoms of Residents over the First Eight Months of Living in a Nursing Home. *Int. Psychogeriatr.* **2014**, *26*, 1161–1170, doi:10.1017/S1041610214000659.
162. D'Alessandro, C.; Sandri, R.; Viti, N.; Ricciardi, T.; Cantatore, A.; Cossovich, P.; Rebecchi, I.; Galetti, G.; Monfardini, S. Cancer in an Italian Nursing Home. *Ann. Oncol.* **2010**, *21*, viii188, doi:10.1093/annonc/mdq520.
163. da Costa, C.C.; Freitas, L.V.; Dias, L.M.B.; Lima, T.M.; Damasceno, A.K. de C.; Pinheiro, A.K.B. Performance of Tests to Prevent Cervical Cancer: Promoting Health Nursing Home. *Rev. Rene* **2010**, *11*, 27–35.
164. Dahlqvist, J.; Ekdahl, A.; Friedrichsen, M. Does Comprehensive Geriatric Assessment (CGA) in an Outpatient Care Setting Affect the Causes of Death and the Quality of Palliative Care? A Subanalysis of the Age-FIT Study. *Eur. Geriatr. Med.* **2019**, *10*, 455–462, doi:10.1007/s41999-019-00198-w.
165. Darjani, A.; Alizadeh, N.; Rafiei, E.; Moulaei, M.; Naseri Alavi, S.H.; Eftekhari, H.; Rafiei, R.; Gharaei-Nejad, K.; Mohtasham-Amiri, Z. Skin Diseases among the Old Age Residents in a Nursing Home: A Neglected Problem. *Dermatology Research & Practice* **2020**, 1–5, doi:10.1155/2020/8849355.
166. Dasch, B.; Bausewein, C.; Feddersen, B. Place of Death in Patients with Dementia and the Association with Comorbidities: A Retrospective Population-Based Observational Study in Germany. *BMC Palliative Care* **2018**, *17*, N.PAG-N.PAG, doi:10.1186/s12904-018-0334-0.
167. De Gaetano, C.; Lichtman, S.M. Care of Elderly Women with Ovarian Cancer. *Geriatr. Nurs.* **2004**, *25*, 329–334, doi:10.1016/j.gerinurse.2004.09.015.
168. De La Motte Rouge, T.; Chaïbi, P.; Vignot, S.; Boussion, H.; Cabel, L.; Geiss, R.; Delgado, F.-M.; Khayat, D.; Chebib, A.; Spano, J.-P. Frequency of Cognitive Impairment (CI) in Elderly Patients (Pts) Suffering from Malignancies and Impact on Therapeutic Decision. *J. Clin. Oncol.* **2012**, *30*.
169. de Luis, D.A.; Izaola, O.; López, L.; Blanco, B.; Colato, C.A.; Kelly, O.J.; Sanz, R.; Bayo, H.; Olivares, M.; González, V.; et al. AdNut Study: Effectiveness of a High Calorie and Protein Oral Nutritional Supplement with  $\beta$ -Hydroxy- $\beta$ -Methylbutyrate in an Older Malnourished Population in Usual Clinical Practice. *Eur. Geriatr. Med.* **2018**, *9*, 809–817, doi:10.1007/s41999-018-0109-4.
170. De Vito, A.; Fiore, V.; Princic, E.; Geremia, N.; Panu Napodano, C.M.; Muredda, A.A.; Maida, I.; Madeddu, G.; Babudieri, S. Predictors of Infection, Symptoms Development, and Mortality in People with SARS-CoV-2 Living in Retirement Nursing Homes. *PLoS ONE* **2021**, *16*, e0248009, doi:10.1371/journal.pone.0248009.
171. de Vries, M. Does the Education Tool Cancer in the Elderly Have International Potential?...Fourth European Nursing Congress. *Journal of Clinical Nursing (John Wiley & Sons, Inc.)* **2010**, *19*, 110–110, doi:10.1111/j.1365-2702.2010.03445.x.
172. Decker B; Hull AH Older Adults with Developmental Disabilities: Encouraging Participation. *OT Practice* **2005**, *10*, CE-2p.
173. Decker, S.L.; Higginson, I.J. A Tale of Two Cities: Factors Affecting Place of Cancer Death in London and New York. *Eur J Public Health* **2007**, *17*, 285–290, doi:10.1093/eurpub/ckl243.
174. Delarue, J.; Chomette, G.; Aryen, D. [Cancer in the elderly person. Necropsic enumeration in an old age home population. *J. Bull Assoc Fr Etud Cancer* **1961**, *48*, 18–34.
175. Devlin B; Agnew A An Evaluation of a Domiciliary Blood Transfusion Service for Palliative Care Patients in Northern Ireland. *Community Practitioner* **2008**, *81*, 32–35.
176. Diduszyn, J.; Boigon, M.; Glew, C.; Hofmann, M.T. Osteonecrosis of the Mandible in a Nursing Home Resident Receiving Bisphosphonate Therapy. *Ann. Long-Term Care* **2008**, *16*, 37–40.
177. Dixit, S.; Shumack, S. A Guide to Skin Conditions in Older People. *Med. Today* **2017**, *18*, 10–17.
178. Dobalian, A. Advance Care Planning Documents in Nursing Facilities: Results from a Nationally Representative Survey. *Archives of Gerontology and Geriatrics* **2006**, *43*, 193–212, doi:10.1016/j.archger.2005.10.007.

179. Dobalian, A.; Tsao, J.C.I.; Radcliff, T.A. Diagnosed Mental and Physical Health Conditions in the United States Nursing Home Population: Differences between Urban and Rural Facilities. *J Rural Health* **2003**, *19*, 477–483, doi:10.1111/j.1748-0361.2003.tb00585.x.
180. Dorney, K.M.; Growdon, W.B.; Clemmer, J.; Rauh-Hain, J.A.; Hall, T.R.; Diver, E.; Boruta, D.; Del Carmen, M.G.; Goodman, A.; Schorge, J.O.; et al. Patient, Treatment and Discharge Factors Associated with Hospital Readmission within 30 days after Surgery for Vulvar Cancer. *Gynecol. Oncol.* **2017**, *144*, 136–139, doi:10.1016/j.ygyno.2016.11.009.
181. dos Santos, R.P.; de Almeida, A.C.C.H. THE PREVALENCE OF INTRA-EPITHELIAL LESIONS IN PREVENTIVE TESTS COLLECTED BY STUDENT NURSES: 2008-2012. *Cogitare Enfermagem* **2014**, *19*, 324–329.
182. Dou, Z.L. Prevalence of Dysphagia in China: An Epidemiology Survey among 6102 Participants. *Neurorehabil. Neural Repair* **2018**, *32*, 361, doi:10.1177/1545968318765497.
183. Downe-Wamboldt, B.L.; Butler, L.J.; Melanson, P.M.; Coulter, L.A.; Singleton, J.F.; Keefe, J.M.; Bell, D.G. The Effects and Expense of Augmenting Usual Cancer Clinic Care with Telephone Problem-Solving Counseling. *Cancer Nurs.* **2007**, *30*, 441–453, doi:10.1097/01.NCC.0000300164.90768.ec.
184. Drageset, J.; Eide, G.E.; Harrington, C.; Ranhoff, A.H. Acute Hospital Admission for Nursing Home Residents without Cognitive Impairment with a Diagnosis of Cancer. *Eur J Cancer Care (Engl)* **2015**, *24*, 147–154, doi:10.1111/ecc.12205.
185. Drageset, J.; Eide, G.E.; Kirkevold, M.; Ranhoff, A.H. Emotional Loneliness Is Associated with Mortality among Mentally Intact Nursing Home Residents with and without Cancer: A Five-Year Follow-up Study. *J Clin Nurs* **2013**, *22*, 106–114, doi:10.1111/j.1365-2702.2012.04209.x.
186. Drageset, J.; Eide, G.E.; Ranhoff, A.H. Cancer in Nursing Homes: Characteristics and Health-Related Quality of Life among Cognitively Intact Residents with and without Cancer. *Cancer Nurs* **2012**, *35*, 295–301, doi:10.1097/NCC.0b013e31822e7cb8.
187. Drageset, J.; Eide, G.E.; Ranhoff, A.H. Mortality in Nursing Home Residents without Cognitive Impairment and Its Relation to Self-Reported Health-Related Quality of Life, Sociodemographic Factors, Illness Variables and Cancer Diagnosis: A 5-Year Follow-up Study. *Qual Life Res* **2013**, *22*, 317–325, doi:10.1007/s11136-012-0143-5.
188. Drageset, J.; Eide, G.E.; Ranhoff, A.H. Anxiety and Depression and Mortality among Cognitively Intact Nursing Home Residents with and without a Cancer Diagnosis: A 5-Year Follow-up Study. *Cancer Nurs* **2013**, *36*, E68–74, doi:10.1097/NCC.0b013e31826fcb11.
189. Drolle, H.; Vehling-Kaiser, U.; Bäuml, E.; Flieser-Hartl, M.; Kaiser, F. Comparison: Proportion of Cancer Patients in the SAPV (Specialized Outpatient Palliative Care) and the Hospice with Comparison of the Length of Stay. *Oncol. Res. Treat.* **2016**, *39*, 178, doi:10.1159/000449050.
190. Duncan, J.G.; Bott, M.J.; Thompson, S.A.; Gajewski, B.J. Symptom Occurrence and Associated Clinical Factors in Nursing Home Residents with Cancer. *Res Nurs Health* **2009**, *32*, 453–464, doi:10.1002/nur.20331.
191. Duncan, J.G.; Forbes-Thompson, S.; Bott, M.J. Unmet Symptom Management Needs of Nursing Home Residents with Cancer. *Cancer Nurs* **2008**, *31*, 265–273, doi:10.1097/01.NCC.0000305738.33958.9f.
192. Eberle, C.M.; Winsemius, D.; Garibaldi, R.A. Risk Factors and Consequences of Bacteriuria in Non-Catheterized Nursing Home Residents. *J Gerontol* **1993**, *48*, M266–271, doi:10.1093/geronj/48.6.m266.
193. Ebner, H.; Spaengler, E. An investigation of the association between bullous pemphigoid and malignant disease. *WIEN. KLIN. WOCHENSCHR.* **1974**, *86*, 449–452.
194. Edwards, R.L.; Andan, C.; Lalla, R.V.; Lacouture, M.E.; O'Brien, D.; Sequist, L.V. Afatinib Therapy: Practical Management of Adverse Events With an Oral Agent for Non-Small Cell Lung Cancer Treatment. *Clin J Oncol Nurs* **2018**, *22*, 542–548, doi:10.1188/18.CJON.542-548.
195. Eichholz Heller, F.; Jimenez-Bautista, A. Building a Bridge to Connect Patients to Their Homeland at End of Life. *Journal of Social Work in End-of-Life & Palliative Care* **2015**, *11*, 96–100, doi:10.1080/15524256.2015.1074139.
196. Eisemon N; Stucky-Marshall L; Talamonti MS Screening for Colorectal Cancer: Developing a Preventive Healthcare Program Utilizing Nurse Endoscopists. *Gastroenterology Nursing* **2001**, *24*, 12–19.
197. Elbadawi, A.; Elgendy, I.Y.; Albaeni, A.; Aly, A.; Almustafa, A.; Shahin, H.I.; Chatterjee, A.; Alkhouli, M.; Khalife, W.; Kapadia, S.; et al. Trends and Outcomes of Transcatheter Valve Implantation in Patients With Prior Mediastinal Radiation. *Am J Cardiol* **2021**, *143*, 167–168, doi:10.1016/j.amjcard.2021.01.003.
198. Elder, A. The Digital Rectal Examination Still Matters. *Diagnosis* **2018**, *5*, eA107, doi:10.1515/dx-2018-0095.
199. Epstein, A.S.; Desai, A.V.; Bernal, C.; Romano, D.; Wan, P.J.; Okpako, M.; Anderson, K.; Chow, K.; Kramer, D.; Calderon, C.; et al. Giving Voice to Patient Values Throughout Cancer: A Novel Nurse-Led Intervention. *J. Pain Symptom Manage.* **2019**, *58*, 72–79.e2, doi:10.1016/j.jpainsymman.2019.04.028.
200. Epstein, J.B.; Lunn, R.; Le, N.D.; Stevenson-Moore, P.; Gorsky, M. Patients with Oropharyngeal Cancer: A Comparison of Adults Living Independently and Patients Living in Long-Term Care Facilities. *Spec Care Dentist* **2005**, *25*, 124–130, doi:10.1111/j.1754-4505.2005.tb01422.x.
201. Eroglu, M.Z.; Gunes, T.; Nebioglu, M. Suicide Attempt by Subcutaneous Injection of Cyanide: A Case Report. *Dusunen Adam* **2014**, *27*, 257–260, doi:10.5350/DAJPN2014270310.
202. Evans, K.D.; Bates, R.C. Describing Elderly Women in Assisted Living's Risk for Breast Cancer and Participation in Screening Behaviors. *J. Diagn. Med. Sonogr.* **2005**, *21*, 320–328, doi:10.1177/8756479305278354.
203. Falandry, C.; Brain, E.; Bonnefoy, M.; Mefti, F.; Savoye, A.; Rigal, O.; Oddou-Lagranière, S.; El Kouri, C.; Uwer, L.; Abadie-Lacourtoisie, S.; et al. Impact of Geriatric Vulnerability Parameters on Pegylated Liposomal Doxorubicin (PLD) Tolerance and

- Outcome in Elderly Patients with Metastatic Breast Cancer: Results of the DOGMES Multicenter Phase II GINECO Trial. *J. Clin. Oncol.* **2011**, *29*.
204. Falandry, C.; Brain, E.; Bonnefoy, M.; Mefti, F.; Jovenin, N.; Rigal, O.; Guillem, O.; El Kouri, C.; Uwer, L.; Abadie-Lacourtoisie, S.; et al. Impact of Geriatric Risk Factors on Pegylated Liposomal Doxorubicin Tolerance and Efficacy in Elderly Metastatic Breast Cancer Patients: Final Results of the DOGMES Multicentre GINECO Trial. *Eur. J. Cancer* **2013**, *49*, 2806–2814, doi:10.1016/j.ejca.2013.04.027.
  205. Feliciano, J.; Gardner, L.; Edelman, M.; Davidoff, A. First Survival Analysis in Elderly Patients (PTS) with Advanced Non-Small-Cell Lung Cancer (NSCLC) Stratified by a Predicted Disability Status (DS) Model: Analysis of Surveillance, Epidemiology and End Results (SEER)-Medicare Claims 2001–2005. *J. Thorac. Oncol.* **2012**, *7*, S210, doi:10.1097/JTO.0b013e318269fc07.
  206. Fernández, P.; Fernández, E.; Arellano, M. Vaginal Moisturizing Post PDR-Pulse Dose Rate Brachytherapy. *Ann. Oncol.* **2019**, *30*, v849, doi:10.1093/annonc/mdz277.012.
  207. Ferrell, B.A. Care of Cancer Patients in Nursing Homes. *Oncology (Williston Park, N.Y.)* **1992**, *6*, 141–145.
  208. Ferrell, B.A.; Ferrell, B.R.; Osterweil, D. Pain in the Nursing Home. *J Am Geriatr Soc* **1990**, *38*, 409–414, doi:10.1111/j.1532-5415.1990.tb03538.x.
  209. Ferrell, B.R.; Ferrell, B.A. Easing the Pain. *Geriatr Nurs* **1990**, *11*, 175–178, doi:10.1016/s0197-4572(05)80337-4.
  210. Finlayson, E.; Zhao, S.; Varma, M.G. Outcomes after Rectal Cancer Surgery in Elderly Nursing Home Residents. *Dis. Colon Rectum* **2012**, *55*, 1229–1235, doi:10.1097/DCR.0b013e318267bfe3.
  211. Firnhaber, C.; Mao, L.; Levin, S.; Faesen, M.; Lewis, D.A.; Goeieman, B.J.; Swarts, A.J.; Rakhombe, N.; Michelow, P.M.; Williams, S.; et al. Evaluation of a Cervicography-Based Program to Ensure Quality of Visual Inspection of the Cervix in HIV-Infected Women in Johannesburg, South Africa. *J. Lower Genital Tract Dis.* **2015**, *19*, 7–11, doi:10.1097/LGT.0000000000000040.
  212. Flannery, M.; McAndrews, L.; Stein, K.F. Telephone Calls by Individuals With Cancer. *Oncology Nursing Forum* **2013**, *40*, 464–471, doi:10.1188/13.ONF.464-471.
  213. Flynn, A.; Stewart, D.E. Where Do Cancer Patients Die? A Review of Cancer Deaths in Cuyahoga County, Ohio, 1957–1974. *J Community Health* **1979**, *5*, 126–130, doi:10.1007/BF01324014.
  214. Forrest JL; Horowitz AM; Shmueli Y Dental Hygienists' Knowledge, Opinions, and Practices Related to Oral and Pharyngeal Cancer Risk Assessment. *Journal of Dental Hygiene* **2001**, *75*, 271–281.
  215. Francke AL; Garssen B; Luiken JB; De Schepper AME; Grypdonck M; Abu-Saad HH Effects of a Nursing Pain Programme on Patient Outcomes. *Psycho-Oncology* **1997**, *6*, 302–310, doi:10.1002/(sici)1099-1611(199712)6:4<302::aid-pon284>3.0.co;2-d.
  216. Frawley, H.C.; Lin, K.-Y.; Granger, C.L.; Higgins, R.; Butler, M.; Denehy, L. An Allied Health Rehabilitation Program for Patients Following Surgery for Abdomino-Pelvic Cancer: A Feasibility and Pilot Clinical Study. *Supportive Care Cancer* **2020**, *28*, 1335–1350, doi:10.1007/s00520-019-04931-w.
  217. Freijer, K.; Tan, S.S.; Koopmanschap, M.A.; Meijers, J.M.M.; Halfens, R.J.G.; Nuijten, M.J.C. The Economic Costs of Disease Related Malnutrition. *Clin Nutr* **2013**, *32*, 136–141, doi:10.1016/j.clnu.2012.06.009.
  218. Freund, K.M.; Reisinger, S.A.; LeClair, A.; Al-Najar, S.; Young, G.S.; Oliveri, J.; Gonzalez, E.; Paskett, E. Impact of Insurance and Primary Care Stability on Cancer Screening Behaviors. *Cancer Epidemiol. Biomarkers Prev.* **2018**, *27*, doi:10.1158/1538-7755.DISP17-C77.
  219. Fukui, S.; Ogawa, K.; Yamagishi, A. Effectiveness of Communication Skills Training of Nurses on the Quality of Life and Satisfaction with Healthcare Professionals among Newly Diagnosed Cancer Patients: A Preliminary Study. *Psycho-Oncology* **2011**, *20*, 1285–1291, doi:10.1002/pon.1840.
  220. Gage, B.; Dao, T. Medicare's Hospice Benefit: Use and Expenditures. *J. Pharm. Care Pain Symptom Control* **2001**, *9*, 57–75, doi:10.1300/J088v09n01\_06.
  221. Gerhart, J.I.; Sanchez Varela, V.; Burns, J.W. Brief Training on Patient Anger Increases Oncology Providers' Self-Efficacy in Communicating With Angry Patients. *Journal of Pain & Symptom Management* **2017**, *54*, 355–360.e2, doi:10.1016/j.jpainsym-man.2017.07.039.
  222. Giannini, I.; Baroncini, A.C.; Baroncini, C.; Latini, E.; Nucci, V.; Mossello, E.; Ungar, A.; Di Bari, M.; Cavallini, M.C. Delirium in Older Adults “ergo” Dementia, but If It Was a Brain Tumor? *Eur. Geriatr. Med.* **2018**, *9*, S315, doi:10.1007/s41999-018-0097-4.
  223. Gimon, T.; MacLean, A.R. Ileal Mycobacterium Tuberculosis in a Patient Treated for Long-Standing Crohn's Disease. *Dis. Colon Rectum* **2018**, *61*, e122–e123, doi:10.1097/DCR.0000000000001104.
  224. Gironi, R.; Fabbrini, M.; Clerici, D.; Oltolini, C.; Greco, R.; Corti, C.; Ciceri, F.; Biella, A. Effect of Nurses Education Program on Catheter Related Blood Stream Infections. *Bone Marrow Transplant.* **2020**, *55*, 731–732, doi:10.1038/s41409-020-01103-x.
  225. Godino C; Jodar L; Durán Á; Martínez I; Schiaffino A Nursing Education as an Intervention to Decrease Fatigue Perception in Oncology Patients. *European Journal of Oncology Nursing* **2006**, *10*, 150–155, doi:10.1016/j.ejon.2005.03.004.
  226. Goldberg, J.I.; Burhenn, P.S.; Ginex, P.K. Nursing Education: Review of Assessment, Clinical Care, and Implications for Practice Regarding Older Adult Patients with Cancer. *Clinical Journal of Oncology Nursing* **2018**, *22*, 19–25, doi:10.1188/18.CJON.S2.19-25.
  227. Gonzalez, T. Chemotherapy Extravasations: Prevention, Identification, Management, and Documentation. *Clin. J. Oncol. Nurs.* **2013**, *17*, 61–66, doi:10.1188/13.CJON.61-66.
  228. Goodman, H.A.; Pacheco, C.L.; Loescher, L.J. An Online Intervention to Enhance Nurse Practitioners' Skin Cancer Knowledge, Attitudes, and Counseling Behaviors: A Pilot Study. *Journal of the Dermatology Nurses' Association* **2018**, *10*, 20–28, doi:10.1097/JDN.0000000000000367.

229. Goodrich TJ; Dyche L Narrative Medicine. Families, Systems & Health: The Journal of Collaborative Family HealthCare **2006**, *24*, 487–488.
230. Gordon, C.; Hendriks, T.; Ranaweera, C.B.; Wallace, M.H.; Ayonrinde, O.T. Characteristics and Outcomes of Octogenarians and Nonagenarians Diagnosed with Colorectal Cancer at a Tertiary Hospital. *J. Gastroenterol. Hepatol.* **2014**, *29*, 127, doi:10.1111/jgh.12736-7.
231. Gordon, R.; Kasler, M.K.; Stasi, K.; Shames, Y.; Errante, M.; Ciccolini, K.; Skripnik Lucas, A.; Raasch, P.; Fischer-Carlidge, E. Checkpoint Inhibitors: Common Immune-Related Adverse Events and Their Management. *Clin J Oncol Nurs* **2017**, *21*, 45–52, doi:10.1188/17.CJON.S2.45-52.
232. Gorzoni, M.L.; Pires, S.L.; De Fátima Costa Faria, L.; Aguado, M.R.V.; Santana, M.C. Human Immunodeficiency Virus in Institutionalized Elderly People. *Sao Paulo Med. J.* **2016**, *134*, 528–533, doi:10.1590/1516-3180.2016.0034150516.
233. Goulet, V.; Hebert, M.; Hedberg, C.; Laurent, E.; Vaillant, V.; De Valk, H.; Desenclos, J.-C. Incidence of Listeriosis and Related Mortality among Groups at Risk of Acquiring Listeriosis. *Clin. Infect. Dis.* **2012**, *54*, 652–660, doi:10.1093/cid/cir902.
234. GREEN, I.; STOW, D.; MATTHEWS, F.E.; HANRATTY, B. Changes over Time in the Health and Functioning of Older People Moving into Care Homes: Analysis of Data from the English Longitudinal Study of Ageing. *Age & Ageing* **2017**, *46*, 693–696, doi:10.1093/ageing/afx046.
235. Griscti, O.; Jacono, J. Effectiveness of Continuing Education Programmes in Nursing: Literature Review. *J Adv Nurs* **2006**, *55*, 449–456, doi:10.1111/j.1365-2648.2006.03940.x.
236. Gross, J.S.; Neufeld, R.R.; Libow, L.S.; Gerber, I.; Rodstein, M. Autopsy Study of the Elderly Institutionalized Patient. Review of 234 Autopsies. *Arch. Intern. Med.* **1988**, *148*, 173–176.
237. Gupta, M.; Venkatanarayan, A.; Kadiyam, S. Capnocytophaga - An Unusual Causative Agent for Empyema. *Am. J. Respir. Crit. Care Med.* **2019**, 199.
238. Gurel, L.; Linn, M.W.; Linn, B.S.; Davis, J.E.; Maroney, R.J. Patients in Nursing Homes. Multidisciplinary Characteristics and Outcomes. *JAMA* **1970**, *213*, 73–77.
239. Hacialioglu, N.; Özer, N.; Yilmaz karabulutlu, E.; Erdem, N.; Erci, B. The Quality of Life of Family Caregivers of Cancer Patients in the East of Turkey. *European Journal of Oncology Nursing* **2010**, *14*, 211–217, doi:10.1016/j.ejon.2010.01.017.
240. Hanlon, A.; Small, W.; Strauss, J.; Lin, L.L.; Hanisch, L.; Huang, L.; Bai, J.; Wells, J.; Bruner, D.W. Dilator Use After Vaginal Brachytherapy for Endometrial Cancer: A Randomized Feasibility and Adherence Study. *Cancer Nursing* **2018**, *41*, 200–209, doi:10.1097/NCC.0000000000000500.
241. Hanson, L.C.; Danis, M. Use of Life-Sustaining Care for the Elderly. *J Am Geriatr Soc* **1991**, *39*, 772–777, doi:10.1111/j.1532-5415.1991.tb02699.x.
242. Hao, Y.; Lang, K.; Huang, H.; Federico, V.; Menzin, J. All-Cause Resource Use among Elderly Breast Cancer Patients by Receipt of Human Epidermal Growth Factor Receptor 2-Targeted Therapy: An Analysis of US National Data 2006–2009. *Cancer Res.* **2013**, *73*, doi:10.1158/0008-5472.SABCS13-P3-06-10.
243. Harker, N. Supporting Patients Living with and beyond Cancer in Primary Care. *Practice Nursing* **2016**, *27*, 431–434, doi:10.12968/pnur.2016.27.9.431.
244. Heilbroner, S.P.; Xanthopoulos, E.; Wang, T.J.C.; Cheng, S. The Effect of Supplemental Estrogen on the Outcomes of NSCLC Patients in the SEER-Medicare Database. *J. Clin. Oncol.* **2017**, 35.
245. Heilbroner, S.P.; Xanthopoulos, E.P.; Wang, T.J.C.; Cheng, S.K. A Population-Based Screen for Repurposed Drugs Using Non-Small Cell Lung Cancer Patients in the Seer-Medicare Database. *Int. J. Radiat. Oncol. Biol. Phys.* **2017**, *99*, E460, doi:10.1016/j.ijrobp.2017.06.1704.
246. Heilbroner, S.P.; Xanthopoulos, E.P.; Wang, T.J.C.; Cheng, S.K. Image-Guided Radiation Therapy Does Not Affect Outcomes in a Cohort of Stage III Non-Small Cell Lung Cancer Patients from the Seer-Medicare Database. *Int. J. Radiat. Oncol. Biol. Phys.* **2017**, *99*, E460, doi:10.1016/j.ijrobp.2017.06.1703.
247. Helft, P.R. Consultations IN Ethics. *Oncology (08909091)* **2012**, *26*, 1120–1120.
248. Hewson, V.L. Raising Awareness of Mouth Cancer in the Care Home. *Nursing & Residential Care* **2018**, *20*, 256–260, doi:10.12968/nrec.2018.20.6.256.
249. Hirai, J.; Kinjo, T.; Haranaga, S.; Fujita, J. Clinical Characteristics of Patients with Community-Acquired Pneumoniae Due to *Moraxella Catarrhalis* in Adults: A Retrospective Single-Center Study in Okinawa Miyako Island in Japan. *Open Forum Infect. Dis.* **2018**, *5*, S448–S449, doi:10.1093/ofid/ofy210.1281.
250. Hoang, C.M.; Davids, J.S.; Maykel, J.A.; Flahive, J.M.; Sturrock, P.R.; Alavi, K. Not All Discharge Settings Are Created Equal: Thirty-Day Readmission Risk after Elective Colorectal Surgery.; United States, 2020; Vol. 63;.
251. Hoerger TJ; Downs KE; Lakshmanan MC; Lindrooth RC; Plouffe L Jr.; Wendling B; West SL; Ohsfeldt RL Healthcare Use among U.S. Women Aged 45 and Older: Total Costs and Costs for Selected Postmenopausal Health Risks. *Journal of Women's Health & Gender-Based Medicine* **1999**, *8*, 1077–1089, doi:10.1089/jwh.1.1999.8.1077.
252. Holman, K.G.; Noce, J.J.; Montgomery, P.J. Hospice Care: Not Available to Everyone. *J Fam Pract* **1985**, *20*, 539, 542, 544–546.
253. Honish, A.; Grimsrud, K.; Miedzinski, L.; Gold, E.; Cherry, R.R. Outbreak of Campbell de Morgan Spots in a Nursing Home--Alberta. *Can Dis Wkly Rep* **1988**, *14*, 211–212.
254. Hopkinson, J.B. Nutritional Support of the Elderly Cancer Patient: The Role of the Nurse. *Nutrition* **2015**, *31*, 598–602, doi:10.1016/j.nut.2014.12.013.

255. Howell SL; Nelson-Marten P; Krebs LU; Kaszyk L; Wold R Promoting Nurses' Positive Attitudes toward Cancer Prevention/Screening. *Journal of Cancer Education* **1998**, *13*, 76–84.
256. Hui, E.; Wong, E.M.C.; Woo, J. Assessing Life Expectancies of Institutionalized Older Persons in Hong Kong. *Gerontology* **2004**, *50*, 165–170, doi:10.1159/000076774.
257. Hunt, R.W.; Fazekas, B.S.; Luke, C.G.; Roder, D.M. Where Patients with Cancer Die in South Australia, 1990–1999: A Population-Based Review. *Med. J. Aust.* **2001**, *175*, 526–529.
258. Hunt, R.W.; D'Onise, K.; Nguyen, A.-M.T.; Venugopal, K. Where Patients With Cancer Die: A Population-Based Study, 1990 to 2012. *J Palliat Care* **2019**, *34*, 224–231, doi:10.1177/0825859718814813.
259. Huntington, S.F.; Keshishian, A.; Xie, L.; Baser, O.; McGuire, M. Evaluating the Economic Burden and Health Care Utilization Following First-Line Therapy for Diffuse Large B-Cell Lymphoma Patients in the US Medicare Population. *Blood* **2016**, *128*.
260. Hustey, F.M. Care Transitions between Nursing Homes and Emergency Departments: A Failure to Communicate. *Ann. Long-Term Care* **2010**, *18*, 17–19.
261. I-Chiang Shy; Ching-Yun Han Diagnosing a Cutaneous Horn on an Elderly Woman's Face. *Annals of Long Term Care* **2014**, *22*, 17–19.
262. Ichihara, T.; Sato, K.; Goto, K. [Comparison of home-care and welfare facilities]. *Gan To Kagaku Ryoho* **2012**, *39 Suppl 1*, 115–116.
263. Iida, M.; Masuo, T.; Shigematsu, Y.; Tanaka, M.; Tanaka, K.; Takada, H.; Koh, H.; Tsujimoto, S. A Case of Urothelial Carcinoma with Sarcomatoid Variant of the Urinary Bladder. *Acta Cytol.* **2016**, *60*, 209–210, doi:10.1159/000446388.
264. Ilgili, Ö.; Demirtaş, Y.; Demir, A.; Arda, B.; Karacalar, A. How to decide from ethical point of view? A malignant melanoma case with dementia. *Turk Geriatr. Derg.* **2006**, *9*, 222–225.
265. Inoue, K.; Tani, H.; Fukunaga, T.; Abe, S.; Nishimura, F.; Kimura, Y.; Kaiya, H.; Nata, M.; Okazaki, Y. Psychosomatic Tendency for Suicide among the Elderly in Mie Prefecture, Japan. *Psychogeriatrics* **2007**, *7*, 44–48, doi:10.1111/j.1479-8301.2006.00159.x.
266. Iqbal Penwala, T.; Bin Mohamed Yusof, A.K.; Tan, L.K. Rare Case of Primary Cardiac Lymphoma in Immunocompetent Patient. *Eur. Heart J. Cardiovasc. Imaging* **2020**, *21*, i558, doi:10.1093/ehjci/jez319.524.
267. Irvin, S. The Experiences of the Registered Nurse Caring for the Person Dying of Cancer in a Nursing Home. *Collegian* **2000**, *7*, 30–34, doi:10.1016/s1322-7696(08)60388-1.
268. Iuliano, F.; Iuliano, E.; Perricelli, A.; Pomillo, A.; Luci, M.; Cervo, G. Assisted Administration of Subcutaneous 5-Azacytidine to the Patient's Home. Significant Reduction of Indirect Costs Incurred by Care Recipients and Unpaid Caregivers Together with a Total Adherence to the Treatment Schedule and Same Safety. *Blood* **2013**, *122*.
269. Iuliano, F.; Iuliano, E.; Rossi, M. Assisted Administration of Subcutaneous Rituximab to the Patient's Home. Significant Reduction of Indirect Costs Incurred by Care Recipients and Unpaid Caregivers Together with a Total Adherence to the Treatment Schedule and Same Safety. *Blood* **2018**, *132*, doi:10.1182/blood-2018-99-118756.
270. Iuliano, F.; Perricelli, A.; Iuliano, E.; Pomillo, A.; Cervo, G.; Corea, F.; Gammuto, D.; Rella, M.; Salerno, C. Assisted Administration of Subcutaneous 5-Azacytidine to the Patient's Home Is Safe and Cost-Effective. *Haematologica* **2014**, *99*, 622.
271. Iyer, P.; Ibrahim, M.; Dirweesh, A.; Zaman, M.K. Syndrome of Inappropriate Secretion of ADH (SIADH)—an Unusual Initial Presentation of Non Small Cell Lung Cancer. *Am. J. Respir. Crit. Care Med.* **2017**, *195*, doi:10.1164/ajrccmconference.2017.C80H.
272. Jackson, M.L. Transitional Care: Methods and Processes for Transitioning Older Adults With Cancer in a Postacute Setting. *Clin J Oncol Nurs* **2018**, *22*, 37–41, doi:10.1188/18.CJON.S2.37-41.
273. Jarosek, S.L.; Shippee, T.P.; Virnig, B.A. Place of Death of Individuals with Terminal Cancer: New Insights from Medicare Hospice Place-of-Service Codes. *Journal of the American Geriatrics Society* **2016**, *64*, 1815–1822, doi:10.1111/jgs.14269.
274. Jayasekera, J.; Onukwugha, E.; Bikov, K.A.; Daniel Mullins, C.; Seal, B.S.; Hussain, A. Incremental Cost (IC) Analysis of Skeletal Related Events (SREs) among Elderly Men with Stage IV Metastatic (M1) Prostate Cancer (PCa). *J. Clin. Oncol.* **2013**, *31*.
275. Jiménez-Mola, S.; Idoate, J.; López, M.; Martín, E.; Benítez, C.; Idoate, D.; Plaza, M. In-Hospital Mortality Following Hip Fractures in the Elderly. *Eur. Geriatr. Med.* **2019**, *10*, S206, doi:10.1007/s41999-019-00221-0.
276. Johnson, J.C.S.; Byrne, G.J.A. Takotsubo Cardiomyopathy in the Context of Major Neurocognitive Disorder and Multiple Risk Factors. *Swiss Arch. Neurol. Psychiatry Psychother.* **2019**, *170*, doi:10.4414/sanp.2019.03022.
277. Johnson, L.M. Self-Governance: Treatment for an Unhealthy Nursing Culture. *Health Prog* **1987**, *68*, 41–43.
278. Johnson, TaliM. Long-Term Care: Safe Drug Handling of Oral Chemotherapy. *consult pharm* **2017**, *32*, 74–83, doi:10.4140/TCP.n.2017.74.
279. Johnston G; Gao J; Lavergne R; Rheume D; Dummer T; MacIntyre M Palliative Radiotherapy: Associations with Age and Nursing Home Residency for Adults Dying of Cancer in Nova Scotia, 2000–2004...17th International Congress on Palliative Care, September 23–26, 2008/Palais Des Congres, Montreal, Canada. *Journal of Palliative Care* **2008**, *24*, 210–210.
280. Johnston, G.M.; Urquhart, R.; Lethbridge, L.; MacIntyre, M. Increasing Our Understanding of Dying of Breast Cancer: Comorbidities and Care. *Prog. Palliative Care* **2016**, *24*, 147–152, doi:10.1080/09699260.2015.1108638.
281. Jones, L. The Nutrition of Elderly People. *J. Hum. Nutr. Diet.* **1999**, *12*, 483, doi:10.1046/j.1365-277x.1999.00199.x.
282. Jones, M. The Common Misdiagnosis That Can Land You in a Nursing Home. *Bottom Line Health* **2014**, *28*, 1–14.
283. Kabboord, A.D.; Van Eijk, M.; Buijck, B.I.; Koopmans, R.T.C.M.; van Balen, R.; Achterberg, W.P. Comorbidity and Intercurrent Diseases in Geriatric Stroke Rehabilitation: A Multicentre Observational Study in Skilled Nursing Facilities. *Eur. Geriatr. Med.* **2018**, *9*, 347–353, doi:10.1007/s41999-018-0043-5.

284. Kamel, H.K. Minimizing the Risk of Another Hip Fracture in a Patient with Osteoporosis. *Ann. Long-Term Care* **2005**, *13*, 23–24.
285. Kamisetty, A.; Magennis, P.; Lowe, D.; Rogers, S.N. Place of Death of Oral and Oropharyngeal Squamous Cell Carcinoma (OO-SCC) Patients 1992–2009: Who Dies at Home? *Br. J. Oral Maxillofac. Surg.* **2011**, *49*, S9, doi:10.1016/j.bjoms.2011.04.024.
286. Kamm, A.M.; Turaga, K.K. Appendiceal Mucinous Neoplasm: Nurse Education about a Rare and Complex Disease. *Clinical Journal of Oncology Nursing* **2020**, *24*, 409–414, doi:10.1188/20.CJON.409-414.
287. Kane, R.L.; Kane, R.A.; Arnold, S.B. Prevention and the Elderly: Risk Factors. *Health Serv Res* **1985**, *19*, 945–1006.
288. Kanters, A.E.; Nikolian, V.C.; Kamdar, N.S.; Regenbogen, S.E.; Hendren, S.K.; Suwanabol, P.A. Academic Hospitals Discharge Fewer Patients to Postacute Care Facilities After Colorectal Resection. *Dis. Colon Rectum* **2019**, *62*, 483–490, doi:10.1097/DCR.0000000000001308.
289. Kaplan, M. Hospital Acquired Infections. *CLIN.BULL.* **1974**, *3*, 134–137.
290. Kardinah, D.; Anderson, B.O.; Duggan, C.; Ali, I.A.; Thomas, D.B. Short Report: Limited Effectiveness of Screening Mammography in Addition to Clinical Breast Examination by Trained Nurse Midwives in Rural Jakarta, Indonesia. *Int. J. Cancer* **2014**, *134*, 1250–1255, doi:10.1002/ijc.28442.
291. Karlsson, E.; Egenvall, M.; Farahnak, P.; Bergenmar, M.; Nygren-Bonnier, M.; Franzén, E.; Rydwick, E. Better Preoperative Physical Performance Reduces the Odds of Complication Severity and Discharge to Care Facility after Abdominal Cancer Resection in People over the Age of 70 - A Prospective Cohort Study. *Eur J Surg Oncol* **2018**, *44*, 1760–1767, doi:10.1016/j.ejso.2018.08.011.
292. Kaushik, S.; Hounscome, L.; Blinman, C.; Gornall, R.; Verne, J. The Impact of Sociodemographic Factors and Emergency Admissions on the Place of Death of Gynecological Cancer Patients in England: An Analysis of a National Mortality-Hospital Episode Statistics-Linked Data Set. *Int. J. Gynecol. Cancer* **2018**, *28*, 1714–1721, doi:10.1097/IGC.0000000000001373.
293. Kelkar, K.; Salvi, R.; Kanitkar, S.; Bejoy, C. Effectiveness of Educational Intervention Regarding Knowledge of Self-Care Management of Diabetes Mellitus during Pandemic COVID 19 among Senior Citizens Residing in Selected Old Age Homes. *Eur. J. Mol. Clin. Med.* **2021**, *8*, 2363–2373.
294. Kelsey, D.; Zakeri, S.; Hettiaratchi, C.; Offonry, N. Avoidance Behaviours and Missed Opportunities in a Case of Metastatic Squamous Cell Carcinoma. *Case Rep. Oncol. Med.* **2015**, *2015*, doi:10.1155/2015/235943.
295. Kennedy, V.E.; Keegan, T.; Li, Q.; Maguire, F.; Muffly, L.S. Intensity of Front-Line Regimen Is Associated with Admissions, in-Hospital Days, and Discharge Destination in Older Adults With acute Myeloid Leukemia: A Population-Based Analysis. *Blood* **2020**, *136*, 29, doi:10.1182/blood-2020-141344.
296. Kenny, J.C.; Keenan, P.W. A Survey of Breast Cancer Detection Methods in Long-Term Care Facilities. *J Gerontol Nurs* **1991**, *17*, 20–22, doi:10.3928/0098-9134-19910401-05.
297. Kenzik, K.M.; Williams, G.R.; Bhatia, S.; Balentine, C.J. Post-Acute Care among Older Adults with Stage I to III Colorectal Cancer. *J Am Geriatr Soc* **2019**, *67*, 937–944, doi:10.1111/jgs.15680.
298. Khakoo, S.; Georgiou, A.; Hughes, D.; Lanese, A.; Baratelli, C.; Coakley, M.; Shepherd, S.; Calamai, V.; Kouvelakis, K.; Kalaitzaki, R.; et al. Real World Use of Palliative Systemic Therapy (Tx) in Elderly Patients (Pts) with Metastatic Colorectal Cancer (MCR) within a UK Specialist Cancer Centre. *Ann. Oncol.* **2017**, *28*, x48, doi:10.1093/annonc/mdx659.020.
299. Khan, S.; Scwabas, G.M.; Lombardo, K.R.; Nagorney, D.M.; Sarr, M.G.; Donohue, J.H.; Kendrick, M.L.; Que, F.G.; Farnell, M.B. Pancreatoduodenectomy for Ductal Adenocarcinoma in the Very Elderly; Is It Safe and Justified? *Gastroenterology* **2010**, *138*, S889.
300. Khattak, B.S. Communication in Medicine. *CME Bull. Respir. Med.* **2000**, *2*, 70.
301. Kiely, D.K.; Flacker, J.M. Common and Gender Specific Factors Associated with One-Year Mortality in Nursing Home Residents. *J. Am. Med. Dir. Assoc.* **2002**, *3*, 302–309, doi:10.1016/S1525-8610(05)70545-4.
302. King, E.; Rimer, B.K.; Benincasa, T.; Harrop, C.; Amfoh, K.; Bonney, G.; Kornguth, P.; Demark-Wahnefried, W.; Strigo, T.; Engstrom, P. Strategies to Encourage Mammography Use among Women in Senior Citizens' Housing Facilities. *J Cancer Educ* **1998**, *13*, 108–115, doi:10.1080/08858199809528526.
303. Kissane C Looking after Bob. *N2N: Nurse2Nurse* **2002**, *2*, 21–23.
304. Kleier, J.A. When Clinical Practice Guidelines And Clinical Practice Diverge. *Urologic Nursing* **2015**, *35*, 269–270, doi:10.7257/1053-816X.2015.35.6.269.
305. Knox, A. Fall Risk Perceptions: A Study of Hospitalized Patients with Hematologic Malignancies. *Clinical Journal of Oncology Nursing* **2018**, *22*, E159–E165, doi:10.1188/18.CJON.E159-E165.
306. Konecne SM; Perdomo M Lymphedema in the Elderly: A Special Needs Population. *Topics in Geriatric Rehabilitation* **2004**, *20*, 98–113, doi:10.1097/00013614-200404000-00005.
307. Korc-Grodzicki, B.; Wallace, J.A.; Rodin, M.B.; Bernacki, R.E. Cancer in Long-Term Care. *Clin Geriatr Med* **2011**, *27*, 301–327, doi:10.1016/j.cger.2011.03.011.
308. Kort, H.S.M. Technology for Longevity: Predictors for Use of Technology. *Medicina* **2016**, *49*, 24–26.
309. Krongrad, A.; Lai, H.; Lai, S. Hospitalization, Inpatient Physical Therapy and Institutionalization after Hospital Discharge of Prostate Cancer Patients in South Florida. *J Urol* **1998**, *159*, 888–892.
310. Kruizenga, H.M.; Wierdsma, N.J.; van Bokhorst, M.A.E.; Schueren, de van der; Haollander, H.J.; Jonkers-Schuitema, C.F.; van der Heijden, E.; Melis, G.C.; van Staveren, W.A. Screening of Nutritional Status in The Netherlands. *Clin Nutr* **2003**, *22*, 147–152, doi:10.1054/clnu.2002.0611.

311. Lage, D.E.; DuMontier, C.; Lee, Y.; Nipp, R.D.; Mitchell, S.L.; Temel, J.S.; El-Jawahri, A.; Berry, S.D.; El-Jawahri, A. Potentially Burdensome End-of-Life Transitions among Nursing Home Residents with Poor-Prognosis Cancer. *Cancer* (0008543X) **2020**, *126*, 1322–1329, doi:10.1002/cncr.32658.
312. Lakasing, E.; Kulkarni, S.; Sparkes, C.; Ravichander, R. A Practice-Based Survey of Patients Dying in Hospital: Can We Do More to Support End-of-Life Care at Home? *Br J Community Nurs* **2014**, *19*, 130–133, doi:10.12968/bjcn.2014.19.3.130.
313. Lanca, A.; Assis, R.; Gama, P.; Cortes, C.; Paredes, S.; Ferrer, F.; Lobos, A.V. Risk of Progression to End Stage Renal Disease among Geriatric Patients with Acute Kidney Injury Progression to End Stage Renal Disease among Geriatric Patients with Acute Kidney Injury. *Nephrol. Dial. Transplant.* **2017**, *32*, iii170, doi:10.1093/ndt/gfx143.
314. Lane, A.; Davis, M.; Wade, J.; Turner, E.; Walsh, E.; Holding, P.; Bonnington, S.; Metcalfe, C.; Martin, R.; Neal, D. Maximising Participant Retention and Outcome Data in a Long Term Cancer Trial (Protect). *Trials* **2017**, *18*, doi:10.1186/s13063-017-1902-y.
315. Lang, K.; Hao, Y.; Huang, H.; Federico, V.; Menzin, J. All-Cause Costs among Elderly Breast Cancer Patients by Receipt of Human Epidermal Growth Factor Receptor 2-Targeted Therapy: An Analysis of US National Data 2006–2009. *Cancer Res.* **2013**, *73*, doi:10.1158/0008-5472.SABCS13-P3-06-07.
316. Langan, R.C.; Bucciarelli, P.R.; Chapman, W.; Oza, K.; Fehring, C.; Jackson, P.G.; Fishbein, T.M.; Jha, R.; Haddad, N.; Al-Kawas, F.; et al. Pancreaticoduodenectomy in the Oldest of Old: Results beyond Operative Mortality. *HPB* **2014**, *16*, 66–67.
317. Lautenschläger, S. [Therapeutic Nursing in Neurological (Early-)Rehabilitation: A Grounded Theory Study]. *Rehabilitation (Stuttg)* **2015**, *54*, 273–278, doi:10.1055/s-0035-1555907.
318. Lawday, S.; Keogh, K.; Perkins, D.; Smart, N.; Daniels, I. Decision-Making in the over-90s with Colorectal Cancer. *Int. J. Surg.* **2017**, *47*, S28.
319. Lawrence, S.; Robinson, A.; Eagar, K. Identification of the Trajectory of Functional Decline for Advance Care Planning in a Nursing Home Population. *Australas J Ageing* **2017**, *36*, E14–E20, doi:10.1111/ajag.12454.
320. Lazzaro M; Thompson M Update on Prostate Cancer Screening. *Lippincott's Primary Care Practice* **1997**, *1*, 408–420.
321. Le Blanc, T.W.; Seetasith, A.; Choi, M.; Surinach, A.; To, T.M.; Nixon, M.; Montez, M.; Ma, E. Transfusion Burden on Older Patients with Acute Myeloid Leukemia Receiving Low-Intensity Treatments. *HemaSphere* **2020**, *4*, 798–799, doi:10.1097/HS9.0000000000000404.
322. Le, T.T.; Kuzucan, A.; Simoni-Wastila, L. Validating the Latent Construct of Problematic Opioid Use among Medicare Beneficiaries. *Pharmacoepidemiol. Drug Saf.* **2018**, *27*, 298, doi:10.1002/pds.4629.
323. Lee, H. Special Issue on Global Health Disparities Focus on Cancer. *Asia Pac J Oncol Nurs* **2016**, *3*, 309–311, doi:10.4103/2347-5625.195883.
324. Leedo, E.; Gade, J.; Granov, S.; Mellemegaard, A.; Klausen, T.W.; Rask, K.; Astrup, A. The Effect of a Home Delivery Meal Service of Energy- and Protein-Rich Meals on Quality of Life in Malnourished Outpatients Suffering from Lung Cancer: A Randomized Controlled Trial. *Nutrition & Cancer* **2017**, *69*, 444–453, doi:10.1080/01635581.2017.1283421.
325. Leibovitz, A.; Habet, B.; Walach, N.; Gil, I. [Elderly cancer patients requiring skilled nursing care]. *Harefuah* **1996**, *131*, 156–160, 216, 215.
326. Leroy, B.; Ahbib, S.; Marot, L.; Vereecken, P. Sequential Treatment with MAL-PDT and Imiquimod (Aldara®) in Difficult-to-Treat Basal Cell Carcinomas: Long-Term Outcome. *Melanoma Res.* **2011**, *21*, e59, doi:10.1097/01.cmr.0000399537.31086.16.
327. Levine, S.K.; Sachs, G.A.; Jin, L.; Meltzer, D. A Prognostic Model for 1-Year Mortality in Older Adults after Hospital Discharge. *Am. J. Med.* **2007**, *120*, 455–460, doi:10.1016/j.amjmed.2006.09.021.
328. Levitt, S.H.; Kempen, P.M.; Mor, V.; Bernabei, R.; Lapane, K.L.; Gambassi, G. Managing Pain in Elderly Patients [1] (Multiple Letters). *J. Am. Med. Assoc.* **1999**, *281*, 605–606, doi:10.1001/jama.281.7.605.
329. Li, S.; Guo, H.; Peng, Y.; Gong, T.; Fu, A.; Bhowmik, D.; Hernandez, R.K.; Carlson, K.B.; Lowe, K.A.; Rana, J.; et al. Discharge Status and Post-Discharge Healthcare Costs after Skeletal-Related Event Hospitalizations among Medicare Patients with Bone Metastatic Solid Tumors or Multiple Myeloma. *J. Bone Oncol.* **2021**, *26*, doi:10.1016/j.jbo.2020.100328.
330. Li, T.; Shore, N.D.; Mehra, M.; Todd, M.; Saadi, R.; Leblay, G.; Griffiths, R. The Impact of Subsequent Metastases on Survival and Medical Costs in Prostate Cancer Patients. *Eur. Urol. Suppl.* **2016**, *15*, e67.
331. Lindqvist, E.K.; Lund, S.H.; Costello, R.; Burton, D.; Korde, N.; Mailankody, S.; Björkholm, M.; Gudnason, V.; Eiriksdottir, G.; Launer, L.J.; et al. Monoclonal Gammopathy of Undetermined Significance (MGUS) Is Associated with a 30% Increased Risk of Dying at 8 Years of Follow-up: Results from a Screened Cross-Sectional Population-Based Study. *Haematologica* **2014**, *99*, 115.
332. Lindström, P.; Janzon, L.; Sternby, N.H. Declining Autopsy Rate in Sweden: A Study of Causes and Consequences in Malmö, Sweden. *J. Intern. Med.* **1997**, *242*, 157–165, doi:10.1046/j.1365-2796.1997.00178.x.
333. Linn, B.S.; Linn, M.W.; Gurel, L. Correlates of Prognosis: A Study of the Physician's Clinical Judgment. *Med Care* **1973**, *11*, 430–435, doi:10.1097/00005650-197309000-00007.
334. Liu, J.Y.; Bilimoria, K.Y. Surgical Decision Making in Elderly, Impaired Nursing Home Patients. *JAMA Surg* **2018**, *153*, 1096–1097, doi:10.1001/jamasurg.2018.2737.
335. Liu, S.-H.; Hunnicutt, J.N.; Ulbricht, C.M.; Dubé, C.E.; Hume, A.L.; Lapane, K.L. Adjuvant Use and the Intensification of Pharmacologic Management for Pain in Nursing Home Residents with Cancer: Data from a US National Database. *Drugs & Aging* **2019**, *36*, 549–557, doi:10.1007/s40266-019-00650-3.
336. Liuu, E.; Guyot, N.; Valero, S.; Jamet, A.; Ouazzani, H.E.; Bouchaert, P.; Tourani, J.; Migeot, V.; Paccalin, M. Prevalence of Cancer and Management in Elderly Nursing Home Residents. A Descriptive Study in 45 French Nursing Homes. *European Journal of Cancer Care* **2019**, *28*, N.PAG-N.PAG, doi:10.1111/ecc.12957.



337. Llamas del Castillo, M.D. The Institutionized Elderly's Knowledge on Their Illness and Pharmacological Treatment. *Pharm. Care Espana* **2001**, *3*, 358–369.
338. Lobo, Y.; Blake, T.; Blake, T.; Muir, J. A Large Fungating Skin Lesion in an Elderly Nursing Home Resident. *Aust J Gen Pract* **2020**, *49*, 505–506, doi:10.31128/AJGP-12-19-5165.
339. Lopez, J.H.; Reyes-Ortiz, C.A. Subcutaneous Hydration by Hypodermoclysis. *Rev. Clin. Gerontol.* **2010**, *20*, 105–113, doi:10.1017/S0959259810000109.
340. Lou, X.; Sanders, A.; Sancheti, M.; Javidfar, J.; Pickens, A.; Force, S.; Fernandez, F.; Khullar, O. Safety and Feasibility of Thoracoscopic Lung Resection for Non-Small-Cell Lung Cancer in Octogenarians. *Innov. Technol. Tech. Cardiothorac. Vasc. Surg.* **2019**, *14*, 16S–17S, doi:10.1177/1556984519865482.
341. Lovy, M. Pelvic Fragility Fractures: A Debilitating Fracture That Occurs in Elderly Ambulatory Patients with Monoclonal Gammopathy of Uncertain Significance, Pernicious Anemia, Hyponatremia and Is Associated with High Mortality. *Osteoporosis Int.* **2020**, *31*, S214, doi:10.1007/s00198-020-05696-3.
342. Lovy, M. Pelvic Ring Fragility Fractures: A Debilitating Fracture Occurring in Elderly Ambulatory Patients with Monoclonal Gammopathy of Uncertain Significance, Pernicious Anemia, Hyponatremia, and Associated with High Mortality. *J. Bone Miner. Res.* **2020**, *35*, 223, doi:10.1002/jbmr.4206.
343. Lubeek, S.F.K.; van Gelder, M.M.H.J.; van der Geer, E.R.; van de Kerkhof, P.C.M.; Gerritsen, M.J.P. Skin Cancer Care in Institutionalized Elderly in the Netherlands: A Nationwide Study on the Role of Nursing Home Physicians. *J Eur Acad Dermatol Venereol* **2016**, *30*, e236–e237, doi:10.1111/jdv.13573.
344. Lucchetti, G.; Lucchetti, A.L.G.; Pires, S.L.; Gorzoni, M.L. Predictors of Death among Nursing Home Patients: A 5-Year Prospective Study. *Geriatr Gerontol Int* **2015**, *15*, 234–236, doi:10.1111/ggi.12324.
345. Luce, E.A. Lingerling Death from Squamous Cell Carcinoma of the Face. *Hosp Pract* **1989**, *24*, 60–61, 65–66, 71–72.
346. Ludwick, R. Registered Nurses' Knowledge and Practices of Teaching and Performing Breast Exams among Elderly Women. *Cancer Nurs* **1992**, *15*, 61–67.
347. Lukas, A.; Mayer, B.; Fialová, D.; Topinkova, E.; Gindin, J.; Onder, G.; Bernabei, R.; Nikolaus, T.; Denking, M.D. Pain Characteristics and Pain Control in European Nursing Homes: Cross-Sectional and Longitudinal Results from the Services and Health for Elderly in Long TERM Care (SHELTER) Study. *J Am Med Dir Assoc* **2013**, *14*, 421–428, doi:10.1016/j.jamda.2012.12.010.
348. Lusardi, M.M. Using Walking Speed in Clinical Practice: Interpreting Age-, Gender-, and Function-Specific Norms. *Top. Geriatr. Rehabil.* **2012**, *28*, 77–90, doi:10.1097/TGR.0b013e31823d7b9f.
349. Lusky, K.F. Pain Management Found Lacking. *Provider* **1998**, *24*, 79, 81–82.
350. Maartense, E.; Kluin-Nelemans, H.C.; Noordijk, E.M. Non-Hodgkin's Lymphoma in the Elderly. A Review with Emphasis on Elderly Patients, Geriatric Assessment, and Future Perspectives. *Ann. Hematol.* **2003**, *82*, 661–670, doi:10.1007/s00277-003-0722-1.
351. Mack, D.S.; Lapane, K.L. Screening Mammography Among Older Women: A Review of United States Guidelines and Potential Harms. *Journal of Women's Health* (15409996) **2019**, *28*, 820–826, doi:10.1089/jwh.2018.6992.
352. Madden, P.; Coupland, V.; Möller, H.; Davies, E. Using Maps and Funnel Plots to Explore Variation in Place of Death from Cancer within London, 2002–2007. *Palliat Med* **2011**, *25*, 323–332, doi:10.1177/0269216311398700.
353. Mahalaha, S.A.; Cheruvu, V.K.; Smyth, K.A. Oral Cancer Screening: Practices, Knowledge, and Opinions of Dentists Working in Ohio Nursing Homes. *Special Care in Dentistry* **2009**, *29*, 237–243, doi:10.1111/j.1754-4505.2009.00105.x.
354. Mahmood, A.; Ghazal, H.; Fink, M.G.; Patel, M.; Atchison, C.; Wei, R.; Suenart, P.; Pinzone, J.J.; Slasor, P.; Chung, K. Health-Resource Utilization Attributable to Skeletal-Related Events in Patients with Advanced Cancers Associated with Bone Metastases: Results of the US Cohort from a Multicenter Observational Study. *Community Oncology* **2012**, *9*, 146–157.
355. Maier, R.; Maier, A.; Müller-Busch, C. [Outpatient opiate therapy in cancer patients during their last days of life]. *Schmerz* **2008**, *22*, 148, 150–155, doi:10.1007/s00482-007-0616-6.
356. Mak, L.; Chan, T.; Chan, F.H.; Liu, S. Gallstone Ileus in an Older Nursing Home Resident. *Journal of the American Geriatrics Society* **2016**, *64*, 447–449, doi:10.1111/jgs.13965.
357. Mak, T.W.C.; Dai, D.L.K.; Wa Leung, W.; Lee, J.F.Y.; Ng, S.S.M. A Pilot Study of Enhanced Geriatric Input in Management of Elderly Patients Undergoing Colorectal Cancer Surgery. *Colorectal Dis.* **2014**, *16*, 56, doi:10.1111/codi.12643.
358. Malden, L.T.; Sutherland, C.; Tattersall, M.H.; Morgan, J.; Forsyth, S.; Levi, J.A.; Gunz, F.W. Dying of Cancer. Factors Influencing the Place of Death of Patients. *Med. J. Aust.* **1984**, *141*, 147–150.
359. Malik, K.S.; Reisner, M. A Fatal Case of Treatment Resistant C. Difficile Colitis. *J. Am. Geriatr. Soc.* **2012**, *60*, S192, doi:10.1111/j.1532-5415.2012.04000.x.
360. Malinis, M.; Ngo, T.; Garcia-Diaz, J.; Taimur, S.; Mueller, N.; Eid, A.; Vergidis, P.; Pursell, K.; Bhaskaran, A.; Hoz, R.L.; et al. A Multicenter Study on Clinical Outcomes of Infections within 200 Days of Liver Transplantation among Recipients Age 65 Years and Older. *Open Forum Infect. Dis.* **2017**, *4*, S9–S10, doi:10.1093/ofid/ofxl62.024.
361. Maltoni, B.; Forti, P.; Zoli, M.; Maltoni, M.; Ricci, M. Prevalence of Chronic Cancer and No-Cancer Pain in Elderly Hospitalized Patients: Elements for the Early Assessment of Palliative Care Needs. *Int. J. Gerontol.* **2018**, *12*, 180–185, doi:10.1016/j.ijge.2017.11.005.
362. Manton, K.G.; Liu, K.; Cornelius, E.S. An Analysis of the Heterogeneity of U.S. Nursing Home Patients. *J Gerontol* **1985**, *40*, 34–46, doi:10.1093/geronj/40.1.34.

363. Marchesi, C.; Speroni, S.; Brivio, L.; Lavazza, M.T.; Mazzone, A. Use of Edoxaban in a Cancer Patient. *Ital. J. Med.* **2019**, *13*, 90, doi:10.4081/itjm.2019.s2.
364. Marie Thon Aamodt, I.; Lie, I.; Hellesø, R. Nurses' Perspectives on the Discharge of Cancer Patients with Palliative Care Needs from a Gastroenterology Ward. *International Journal of Palliative Nursing* **2013**, *19*, 396–402, doi:10.12968/ijpn.2013.19.8.396.
365. Marlies Heiligenberg, M.; Maaskant, J.M.; Latour, C.H.M. Differences in Comorbidities between Men and Women with Heart Failure Exist. *Eur. J. Heart Fail.* **2017**, *19*, 268, doi:10.1002/ehf.833.
366. Maroz, N.; Mohandes, S.; Field, H.; Kabakov, Z.; Simman, R. Calciphylaxis in Patients with Preserved Kidney Function. *J. Am. Coll. Clin. Wound Spec.* **2014**, *6*, 24–28, doi:10.1016/j.jccw.2015.08.002.
367. Marrie, T.J. Pneumonia. *Bailliere's Clin. Infect. Dis.* **1998**, *5*, 35–51.
368. Marriott, L.K.; Lipus, A.C.; Choate, L.; Smith, J.; Coppola, L.; Cameron, W.E.; Shannon, J. Experiential Learning Through Participatory Action Research in Public Health Supports Community-Based Training of Future Health Professionals. *Pedagogy Health Promot* **2015**, *1*, 220–232, doi:10.1177/2373379915601119.
369. Marshall, L.L. Megestrol Acetate Therapy in Geriatric Patients: Case Reviews and Associated Deep Vein Thrombosis. *Consult. Pharm.* **2003**, *18*, 764–773.
370. Martin, E.J. A High-Priority Population: Older Patients Require Extra Care and Understanding. *AGD Impact* **2018**, *46*, 12–17.
371. Martoni, A.A.; Degli Esposti, C.; Cricca, A.; Rocchi, G.; Giaquinta, S. Twice-Daily Pain Monitoring as Standard Clinical Practice for Inpatients at a Medical Oncology Unit: A Descriptive Study. *Ann. Oncol.* **2007**, *18*, 158–162, doi:10.1093/annonc/mdl314.
372. Maruthachalam, K.; Stoker, E.; Nicholson, G.; Horgan, A.F. Nurse Led Flexible Sigmoidoscopy in Primary Care - The First Thousand Patients. *Colorectal Dis.* **2006**, *8*, 557–562, doi:10.1111/j.1463-1318.2006.00973.x.
373. Masoorli, S. Education, Education, and More Education. *JAVA J. Assoc. Vasc. Access* **2007**, *12*, 128+130, doi:10.2309/java.12-3-7.
374. Maule, W.F. Screening for Colorectal Cancer by Nurse Endoscopists. *NEW ENGL. J. MED.* **1994**, *330*, 183–187, doi:10.1056/NEJM199401203300307.
375. McCullough, S.; Reckrey, J.; Shah, B. Dysphagia with a Large Goiter: What You See Is Not Necessarily What You Get. *J. Am. Geriatr. Soc.* **2012**, *60*, S78–S79, doi:10.1111/j.1532-5415.2012.04000.x.
376. McLane, L.; Jones, K.; Lydiatt, W.; Lydiatt, D.; Richards, A. Taking Away the Fear: A Grounded Theory Study of Cooperative Care in the Treatment of Head and Neck Cancer. *Psychooncology* **2003**, *12*, 474–490, doi:10.1002/pon.670.
377. McLeroy, T.M.; Gurenlian, J.; Rogo, E.J. The Effect of Continuing Education on Dental Hygienists' Knowledge, Attitudes, and Practices Regarding Human Papillomavirus Related Oropharyngeal Cancer. *Journal of Dental Hygiene* **2020**, *94*, 16–28.
378. McMillan, A.; Mentnech, R.M.; Lubitz, J.; McBean, A.M.; Russell, D. Trends and Patterns in Place of Death for Medicare Enrollees. *Health Care Financ Rev* **1990**, *12*, 1–7.
379. Meijers, J.M.M.; Schols, J.M.G.A.; van Bokhorst-de van der Schueren, M.A.E.; Dassen, T.; Janssen, M.A.P.; Halfens, R.J.G. Malnutrition Prevalence in The Netherlands: Results of the Annual Dutch National Prevalence Measurement of Care Problems. *Br. J. Nutr.* **2009**, *101*, 417–423, doi:10.1017/S0007114508998317.
380. Melac, A.T.; Lesuffleur, T.; Bousquet, P.-J.; Fagot-Campagna, A.; Gastaldi-Ménager, C.; Tuppin, P. Cancer and End of Life: The Management Provided during the Year and the Month Preceding Death in 2015 and Causes of Death in France. *Supportive Care in Cancer* **2020**, *28*, 3877–3887, doi:10.1007/s00520-019-05188-z.
381. Meraviglia MG The Mediating Effects of Meaning in Life and Prayer on the Physical and Psychological Responses of People Experiencing Lung Cancer., University of Texas at Austin, 2001.
382. Mertens, J.; Haddad, M.; De Block, C. CREST Syndrome Diagnosed Due to Faulty Point-of-Care Glycemia: A Case Report. *Acta Clin. Belg.* **2020**, *74*, 15–16, doi:10.1080/17843286.2019.1687975.
383. Messer, M.; Hackenberg, A. [From case to case: What really counts]. *Pflege Z* **2006**, *59*, 518–520.
384. Messer, M.; Weber, M. [From case to case: Making a decision about life]. *Pflege Z* **2008**, *61*, 290–291.
385. Meyer-Kühling, I.; Eckardt, R.; Makrantonaki, E. Professional Caregivers' Knowledge in Dermatology: Improving Knowledge and Communication to Dermatologists in Geriatric Facilities. *Z Gerontol Geriat* **2018**, *51*, 54–59, doi:10.1007/s00391-016-1132-z.
386. Miller, M.B. Decision-Making in the Death Process of the Ill Aged. *Geriatrics* **1971**, *26*, 105–116.
387. Miller, S.C.; Intrator, O.; Gozalo, P.; Roy, J.; Barber, J.; Mor, V. Government Expenditures at the End of Life for Short- and Long-Stay Nursing Home Residents: Differences by Hospice Enrollment Status. *J Am Geriatr Soc* **2004**, *52*, 1284–1292, doi:10.1111/j.1532-5415.2004.52357.x.
388. Minarik, J.; Jungova, A.; Straub, J.; Gregora, E.; Bryknarova, J.; Nemcova, B.; Hajek, R. The Role of Demographic and Social Factors on Decision Making in Patients with Relapsed and Refractory Multiple Myeloma Treated by Ixazomib, Lenalidomide and Dexamethasone. *Blood* **2019**, *134*, doi:10.1182/blood-2019-130961.
389. Mirza, Z.; Roman-Colon, D.; Ortiz-Rivera, M.; Martínez-Souss, J. Old Is Gold: Cecostomy for Recurrent Colonic Pseudo-Obstruction. *Am. J. Gastroenterol.* **2020**, *115*, S1073–S1074, doi:10.14309/01.ajg.0000710228.09158.e8.
390. Missel, M.; Schönauf, M.N.; Pedersen, J.H.; Pedersen, P.U. Transition from Hospital to Daily Life: A Pilot Study. *Rehabil Nurs* **2015**, *40*, 20–29, doi:10.1002/rnj.180.
391. Mitchell, M.A.; Dhaliwal, I.; Mulpuru, S.; Amjadi, K.; Chee, A. Early Readmission to Hospital in Patients With Cancer With Malignant Pleural Effusions: Analysis of the Nationwide Readmissions Database. *Chest* **2020**, *157*, 435–445, doi:10.1016/j.chest.2019.09.007.
392. Mitchell, S.L.; Teno, J.M.; Miller, S.C.; Mor, V. A National Study of the Location of Death for Older Persons with Dementia. *J Am Geriatr Soc* **2005**, *53*, 299–305, doi:10.1111/j.1532-5415.2005.53118.x.

393. Mohri, T.; Ueda, A.; Katsume, Y.; Nagaoka, M.; Momose, Y.; Nonoguchi, N.; Hoshida, K.; Togashi, I.; Sato, T.; Isogaya, K.; et al. PRIMARY CARDIAC B CELL LYMPHOMA FROM SINUS NODE, PRESENTING AS SICK SINUS SYNDROME. *Heart Rhythm* **2019**, *16*, 421, doi:10.1016/j.hrthm.2019.04.017.
394. Mollica, M.A.; Litzelman, K.; Rowland, J.H.; Kent, E.E. The Role of Medical/Nursing Skills Training in Caregiver Confidence and Burden: A CanCORS Study. *Cancer* **2017**, *123*, 4481–4487, doi:10.1002/cncr.30875.
395. Mongil PL; Mongil RL Evaluation of the Neoplastic Condition and Its Impact on the Functional Status of the Institutionalized Elderly Patient. *Gerokomos* **2001**, *12*, 163–172.
396. Montgomery, M.; Cheshire, M.; Johnson, P.; Beasley, A. Incorporating End-of-Life Content Into the Community Health Nursing Curriculum Using High-Fidelity Simulation. *Journal of Hospice & Palliative Nursing* **2016**, *18*, 60–65, doi:10.1097/NJH.0000000000000211.
397. Morin, L.; Wastesson, J.; Fors, S.; Johnell, K. How Do Hundred-Year-Old People Die? Results from a Populationlevel Study of Centenarians in Sweden. *Eur. Geriatr. Med.* **2018**, *9*, S168, doi:10.1007/s41999-018-0097-4.
398. Motiwala, S.S.; Croxford, R.; Guerriere, D.N.; Coyte, P.C. Predictors of Place of Death for Seniors in Ontario: A Population-Based Cohort Analysis. *Can J Aging* **2006**, *25*, 363–371, doi:10.1353/cja.2007.0019.
399. Moutzouris, J.P.; Chow, V.; Yong, A.S.C.; Chung, T.; Naganathan, V.; Kritharides, L.; Chwan, A.C. Acute Pulmonary Embolism in Individuals Aged 80 and Older. *J Am Geriatr Soc* **2014**, *62*, 2004–2006, doi:10.1111/jgs.13063.
400. Mrayyan, M.T. Nurses' Views of Organizational Readiness for Change. *Nurs Forum* **2020**, *55*, 83–91, doi:10.1111/nuf.12393.
401. Mubarak, M.; Daglilar, E.S.; Similari, T.; Ray, A. Metastatic Renal Cell Carcinoma Presenting as a Bleeding Gastric Polyp. *Am. J. Gastroenterol.* **2017**, *112*, S1042–S1043, doi:10.1038/ajg.2017.318.
402. Mulligan, R. The Three Phases of Eve: Exploring the Common and Unique Findings in Oral and Systemic Health of Differently Aging Women. *Compend Contin Educ Dent* **2002**, *23*, 32–40.
403. Murphy, D.P.; Istenes, N.A. Strategies to Promote Successful Aging: Part 2, the Physician's Role. Inside: Preventive Strategies That Help Your Patients Stay in Good Shape... Mentally and Physically. *Consultant* **2005**, *45*, 653–658.
404. Musat, A.; Cailliod, R.; Bismuth, M.-J.; Bernard, A.; Quantin, C. Medico economic impact of standardised procedures after pulmonary lobectomies in lung cancer patients. *J. Econ. Med.* **2005**, *23*, 127–138.
405. Mygind-Klausen, T.; Lauridsen, K.G.; Bødker, H.; Løfgren, B. Emergency Medical Technicians Are Often Consulted on Termination of Resuscitation, and Will Terminate Resuscitation Based on Controversial Single Factors. *Circulation* **2016**, *134*.
406. Nagamatsu, Y.; Natori, Y.; Yanai, H.; Horiuchi, S. Impact of a Nursing Education Program about Caring for Patients in Japan with Malignant Pleural Mesothelioma on Nurses' Knowledge, Difficulties and Attitude: A Randomized Control Trial. *Nurse Educ Today* **2014**, *34*, 1087–1093, doi:10.1016/j.nedt.2014.02.007.
407. Nagamine, M.; Osman, S.; Chen, N.; Akbari, Y.; Mnatsakanya, L.; Korb, M.; Mozaffar, T. Covid-19 Presenting as Post-Infectious Myelitis: A Case Report. *Ann. Neurol.* **2020**, *88*, S57, doi:10.1002/ana.25865.
408. Nakamura, H.; Yoon, W.T.; Kubota, Y.; Nishihara, K. Resumption of Oral Intake after Gastroduodenal Stenting in Patients with Malignant Gastric Outlet Obstruction. *J. Gastroenterol. Hepatol.* **2017**, *32*, 81, doi:10.1111/jgh.13875.
409. Nakazawa, N. Difficult Peripherally Inserted Central Catheter (PICC) Insertions. *JAVA J. Assoc. Vasc. Access* **2005**, *10*, 112–122, doi:10.2309/java.10-3-6.
410. Navon, L.; Morag, A. Advanced Prostate Cancer Patients' Relationships with Their Spouses Following Hormonal Therapy. *Eur. J. Oncol. Nurs.* **2003**, *7*, 73–80, doi:10.1016/S1462-3889(03)00022-X.
411. Nazarko, L. Improving Skin Cancer Awareness in Care Homes. *Nursing & Residential Care* **2018**, *20*, 10–12, doi:10.12968/nrec.2018.20.1.10.
412. Needham, D.S.; Wong, I.C.K.; Campion, P.D. Evaluation of the Effectiveness of UK Community Pharmacists' Interventions in Community Palliative Care. *Palliative Med.* **2002**, *16*, 219–225, doi:10.1191/0269216302pm533oa.
413. Ng, A.; Nadarajan, V.; McIver, S.; Reid, C.; Schofield, E.; Sachar, A. Frequent Attendances to a London Emergency Department: A Service Improvement Project Embedding Mental Health into the Team. *London J. Prim. Care* **2015**, *7*, 70–77, doi:10.1080/17571472.2015.11493438.
414. Nichols J Medical Ethics. Ethics Means Respecting the Individual When a Person's Desires Are Unclear. *Caring for the Ages* **2008**, *9*, 19–19, doi:10.1016/s1526-4114(08)60099-2.
415. Nieder, C.; Norum, J.; Stemland, J.G.; Dalhaug, A. Resource Utilization in Patients with Brain Metastases Managed with Best Supportive Care, Radiotherapy and/or Surgical Resection: A Markov Analysis. *Oncology* **2010**, *78*, 348–355, doi:10.1159/000320347.
416. Nielsen, L.K.; King, M.; Möller, S.; Jarden, M.; Andersen, C.L.; Frederiksen, H.; Gregersen, H.; Klostergaard, A.; Steffensen, M.S.; Pedersen, P.T.; et al. Strategies to Improve Patient-Reported Outcome Completion Rates in Longitudinal Studies. *Qual. Life Res.* **2020**, *29*, 335–346, doi:10.1007/s11136-019-02304-8.
417. Niessen, L.C.; Fedele, D.J. Older Adults--Implications for Private Dental Practitioners. *J Calif Dent Assoc* **2005**, *33*, 695–703.
418. Niznik, J.D.; Zhang, S.; Mor, M.K.; Zhao, X.; Ersek, M.; Aspinall, S.L.; Gellad, W.F.; Thorpe, J.M.; Hanlon, J.T.; Schleiden, L.J.; et al. Adaptation and Initial Validation of Minimum Data Set (MDS) Mortality Risk Index to MDS Version 3.0. *Journal of the American Geriatrics Society* **2018**, *66*, 2353–2359, doi:10.1111/jgs.15579.
419. Nørgaard, B.; Lee, A. Characteristics of Patients Receiving District-Nursing Assistance for Anticoagulant Therapy: A Descriptive Cohort Study. *Eur. Geriatr. Med.* **2017**, *8*, 256–259, doi:10.1016/j.eurger.2017.04.014.

420. Norlander, O.P. Management of Respirator and Anesthesia Patients: Monitoring and Developments. *MED. PROG. TECHNOL.* **1974**, *3*, 15–23.
421. Notsu, M.; Naito, T.; Mori, K.; Notsu, A.; Morikawa, A.; Kawabata, T.; Okayama, T.; Yonenaga, Y.; Sugiyama, M.; Kenmotsu, H.; et al. Days Spent at Home near the End of Life in Japanese Elderly Patients with Lung Cancer: Post Hoc Analysis of a Prospective Study. *Asia-Pacific Journal of Oncology Nursing* **2021**, *8*, 228–236, doi:10.4103/2347-5625.311131.
422. O'Connor, S.; Jolliffe, S.; Stanmore, E.; Renwick, L.; Booth, R. Social Media in Nursing and Midwifery Education: A Mixed Study Systematic Review. *J Adv Nurs* **2018**, *74*, 2273–2289, doi:10.1111/jan.13799.
423. O'Grady ET From the Desk of Eileen T. O'Grady, PhD, RN, NP. Meaningful Prevention. *Nurse Practitioner World News* **2008**, *13*, 1–14.
424. O'Neal, P.V.; McClellan, L.C.; Jarosinski, J.M. A New Model in Teaching Undergraduate Research: A Collaborative Approach and Learning Cooperatives. *Nurse Educ Pract* **2016**, *18*, 80–84, doi:10.1016/j.nepr.2016.03.008.
425. Obeidat, N.A.; Onukwugha, E.; Bikov, K.; Seal, B.; Mullins, C.D. Costs of Care for Elderly Metastatic Prostate Cancer Patients over Time. *Value Health* **2009**, *12*, A47, doi:10.1111/j.1524-4733.2009.00537-2.x.
426. Odejide, O.O.; Cronin, A.M.; Davidoff, A.; LaCasce, A.S.; Abel, G.A. Comparative Effectiveness of Treatments for Limited Stage, Non-Bulky Diffuse Large B-Cell Lymphoma in the Elderly. *Blood* **2013**, *122*.
427. Ohbayashi K; Kataoka Y; Suzuki K Breast Awareness Promotion: Development, Implementation and Evaluation of an Educational Program for Nurse-Midwives. *Journal of St. Luke's Society for Nursing Research* **2009**, *13*, 8–16.
428. Öhlén, J.; Cohen, J.; Håkanson, C. Determinants in the Place of Death for People with Different Cancer Types: A National Population-Based Study. *Acta Oncologica* **2017**, *56*, 455–461, doi:10.1080/0284186X.2016.1250946.
429. Ohson, K.; DesGroseilliers, J.-P.; Weatherhead, S.; Weatherhead, L. Imiquimod 5% Cream Use for the Treatment of Basal Cell Carcinomas in Elderly Patients, in Long-Term Care Facilities, Not Amenable to Surgical or Radiation Therapy. *J Cutan Med Surg* **2006**, *10*, 201–203, doi:10.2310/7750.2006.00033.
430. Olszewski, A.J. Comparative Outcomes of Splenectomy and Rituximab-Based Chemotherapy in Elderly Patients with Splenic Marginal Zone Lymphoma. *J. Clin. Oncol.* **2013**, *31*.
431. Onder, G.; Vetrano, D.L.; Villani, E.R.; Carfi, A.; Lo Monaco, M.R.; Cipriani, M.C.; Manes Gravina, E.; Denkiner, M.; Pagano, F.; van der Roest, H.G.; et al. Deprescribing in Nursing Home Residents on Polypharmacy: Incidence and Associated Factors. *Journal of the American Medical Directors Association* **2019**, *20*, 1116–1120, doi:10.1016/j.jamda.2019.01.130.
432. Orebo Holmström, M.; Gimsing, P.; Abildgaard, N.; Andersen, N.; Clausen, N.; Frederiksen, M.; Gregersen, H.; Kristensen, D.; Larsen, H.; Trøllund Pedersen, P.; et al. Causes of Death 30 and 180 Days after Diagnosis in Non-HDT Treated Danish Multiple Myeloma Patients: A Study from the Danish Myeloma Study Group. *Haematologica* **2013**, *98*, 323.
433. Ørum, M.; Jensen, K.; Meldgaard, P.; Damsgaard, E.M. Frailty Status of Elderly Cancer Patients in the Central Denmark Region. *Eur. Geriatr. Med.* **2015**, *6*, S76.
434. Owan, T.; Kohra, T.; Miyara, Y.; Kohki, M.; Shimo, Y.; Bise, T.; Sugaya, K.; Kiriya, M.; Sunagawa, Y.; Kohno, S. Urination Assessment after the Removal of Bladder Catheter Using a Novel Urination Chart. *Nurs. Health Sci.* **2003**, *5*, 189–197, doi:10.1046/j.1442-2018.2003.00152.x.
435. Panchal, K.; Hussain, M.; Ramaswamy, S. THE CASE OF A DISGUISED PNEUMOTHORAX. *Chest* **2019**, *156*, A2243, doi:10.1016/j.chest.2019.08.2162.
436. Parhar, H.S.; Chang, B.A.; Durham, J.S.; Anderson, D.W.; Hayden, R.E.; Prisman, E. Post-Acute Care Use after Major Head and Neck Oncologic Surgery with Microvascular Reconstruction. *Laryngoscope* **2018**, *128*, 2532–2538, doi:10.1002/lary.27190.
437. Parsons, Y. An Ounce of Prevention. Screening Can Improve Both Quantity and Quality of Life. *Contemp Longterm Care* **1995**, *18*, 50–52.
438. Passik SD; Donaghy KB; Theobald DE; Lundberg JC; Holtsclaw E; Dugan WM Jr.; Passik, S.D.; Donaghy, K.B.; Theobald, D.E.; Lundberg, J.C.; et al. Oncology Staff Recognition of Depressive Symptoms on Videotaped Interviews of Depressed Cancer Patients: Implications for Designing a Training Program. *Journal of Pain & Symptom Management* **2000**, *19*, 329–338.
439. Pastor Ochoa, C.; Herraiz, J.; Hernandez, A.; Morago, M.; Garcia Garcia, R. The Real Degree in Terminal Patients and Special Knowledge about the Diagnosis of Medical Profile Who Are Living in Nurse Home. *Eur. Geriatr. Med.* **2011**, *2*, S48, doi:10.1016/j.eurger.2011.06.002.
440. Patil, S.; Chamberlain, R.S. Whipple Procedure in Octogenarians and Nonagenarians: A United States Population-Based Study Analyzing Morbidity and Mortality Following Whipple Procedure in Elderly Patients (National Inpatient Sample Database 1998–2010). *J. Am. Coll. Surg.* **2015**, *221*, e108–e109.
441. Pawar, A.; Desai, R.; Gautam, N.; Kim, S.C. Risk of Serious Infections in Tofacitinib versus Other Biologic Drug Initiators in Patients with Rheumatoid Arthritis: A Multi-Database Cohort Study. *Arthritis Rheum.* **2019**, *71*, 5011–5013, doi:10.1002/art.41108.
442. Pawar, A.; Desai, R.; He, M.; Bessette, L.; Kim, S. Risk of Non-Vertebral Fractures among Rheumatoid Arthritis Patients Treated with Biologic or Targeted-Synthetic DMARDs: A Multi-Database Comparative Safety Study. *Arthritis Rheum.* **2020**, *72*, 2009–2011, doi:10.1002/art.41538.
443. Pearl, J.A.; Patil, D.; Filson, C.P.; Arya, S.; Alemozaffar, M.; Master, V.A.; Ogan, K. Patient Frailty and Discharge Disposition Following Radical Cystectomy. *Clin Genitourin Cancer* **2017**, *15*, e615–e621, doi:10.1016/j.clgc.2016.12.013.
444. Penn, C.A.; Kamdar, N.S.; Morgan, D.M.; Uppal, S. Preoperatively Predicting Non-Home Discharge after Surgery for Gynecologic Malignancy. *Gynecol. Oncol.* **2017**, *145*, 15–16, doi:10.1016/j.ygyno.2017.03.054.

445. Percival, J.; Abbott, K.; Allain, T.; Bradley, R.; Cramp, F.; Donovan, J.L.; McCabe, C.; Neubauer, K.; Redwood, S.; Cotterill, N. "We Tend to Get Pad Happy": A Qualitative Study of Health Practitioners' Perspectives on the Quality of Continence Care for Older People in Hospital. *BMJ Open Qual* **2021**, *10*, doi:10.1136/bmjoq-2021-001380.
446. Perkins RB; Langrish S; Stern LJ; Simon CJ A Community-Based Education Program about Cervical Cancer Improves Knowledge and Screening Behavior in Honduran Women. *Revista Panamericana de Salud Publica* **2007**, *22*, 187–193, doi:10.1590/s1020-49892007000800005.
447. Pietrokovski, J.; Levy, F.; Azuelos, J.; Tau, S.; Tamari, I.; Mostavoy, R. Oral Findings in Elderly Nursing Home Residents in Selected Countries. 2. Soft Tissue Lesions and Denture Wearing Habits. *Gerodontology* **1990**, *9*, 75–81, doi:10.1111/j.1741-2358.1990.tb00262.x.
448. Pijpe, A.; Slottje, P.; van Pelt, C.; Stehmann, F.; Kromhout, H.; van Leeuwen, F.E.; Vermeulen, R.C.H.; Rookus, M.A. The Nightingale Study: Rationale, Study Design and Baseline Characteristics of a Prospective Cohort Study on Shift Work and Breast Cancer Risk among Nurses. *BMC Cancer* **2014**, *14*, doi:10.1186/1471-2407-14-47.
449. Pita Campos, Á. Cuidados Paliativos En Paciente Con Adenocarcinoma Pancreático En Estadio Terminal. *Etica de los Cuidados* **2017**, *10*, 1–10.
450. Poulin, C.; Schlech, W.F. 3rd A Pseudo-Outbreak in a Nursing Home. *Infect Control Hosp Epidemiol* **1991**, *12*, 521–522, doi:10.1086/646401.
451. Powell, D.; Pollack, M.; Moretz, C.; Robinson, S.; Parente, A.; Xi, A.; Dreyfus, J.; Make, B.; Feigler, N. Assessment of Healthcare Resource Use by Comorbidity Burden among COPD Patients Diagnosed across Multiple Payer Settings. *J. Manag. Care Spec. Pharm.* **2020**, *26*, S58.
452. Qadri, S. Rare Cutaneous Melanoma in a Centenarian. *J. Am. Med. Informatics Assoc.* **2018**, *19*, B8, doi:10.1016/j.jamda.2017.12.032.
453. Rajkumar, A.; Baum, E. Cerebral Venous Sinus Thrombosis Resulting from Herpes Zoster Infection in an Older Adult. *Ann. Long-Term Care* **2016**, *24*, 27–30.
454. Ramfelt E; Severinsson E; Lützén K Attempting to Find Meaning in Illness to Achieve Emotional Coherence: The Experiences of Patients with Colorectal Cancer. *Cancer Nursing* **2002**, *25*, 141–149.
455. Ramkumar, P.N.; Gwam, C.; Navarro, S.M.; Haeberle, H.S.; Karnuta, J.M.; Delanois, R.E.; Mont, M.A. Discharge to the Skilled Nursing Facility: Patient Risk Factors and Perioperative Outcomes after Total Knee Arthroplasty. *Ann. Transl. Med.* **2019**, *7*, doi:10.21037/atm.2018.12.62.
456. Ramudu, L.; Bellet, B.; Higgs, J.; Latimer, C.; Smith, R. How Effectively Do We Use Double Staff Time? *Aust J Adv Nurs* **1994**, *11*, 5–10.
457. Rand, K.L.; Cohee, A.A.; Monahan, P.O.; Wagner, L.I.; Shanahan, M.L.; Champion, V.L. Coping Among Breast Cancer Survivors: A Confirmatory Factor Analysis of the Brief COPE. *Journal of Nursing Measurement* **2019**, *27*, 259–276, doi:10.1891/1061-3749.27.2.259.
458. Rangarajan, S. Leptomeningeal Carcinomatosis from Esophageal Cancer Presenting with Dysphagia. *J. Am. Geriatr. Soc.* **2017**, *65*, S95, doi:10.1111/(ISSN)1445-5994.
459. Rawlings, C.; Cameron, A.; Zaimin, W.; Healy, H.; Hoy, W. Comparing Those with CKD (Chronic Kidney Disease) Planed for Renal Supportive Care (RSC) and Those for Renal Replacement Therapy (RRT). *Nephrology* **2016**, *21*, 178, doi:10.1111/nep.12888.
460. Reblin, M.; Clayton, M.F.; Xu, J.; Hulett, J.M.; Latimer, S.; Donaldson, G.W.; Ellington, L. Caregiver, Patient, and Nurse Visit Communication Patterns in Cancer Home Hospice. *Psycho-Oncology* **2017**, *26*, 2285–2293, doi:10.1002/pon.4361.
461. Redaniel, M.T.; Laudico, A.; Mirasol-Lumague, M.R.; Gondos, A.; Uy, G.; Brenner, H. Inter-Country and Ethnic Variation in Colorectal Cancer Survival: Comparisons between a Philippine Population, Filipino-Americans and Caucasians. *BMC Cancer* **2010**, *10*, doi:10.1186/1471-2407-10-100.
462. Reddy, V.; Nguyen, K.P.; Faiz, S.; Glass, W.; Kala, J.; Zhang, S. RENAL METASTASIS - RARE INITIAL PRESENTATION OF OVARIAN CANCER. *Am. J. Kidney Dis.* **2020**, *75*, 624, doi:10.1053/j.ajkd.2020.02.306.
463. Reichman, W. Late Life Depression and Dementia. *Prim. Care Update Ob Gyns* **2003**, *10*, 238–241, doi:10.1016/S1068-607X(03)00048-9.
464. Reilev, M.; Lundby, C.; Hoffmann, H.; Larsen, S.P.; Jensen, J.; Pottegard, A. Drug Use among Older People Admitted to Nursing Homes. *Pharmacoepidemiol. Drug Saf.* **2019**, *28*, 287–288, doi:10.1002/pds.4864.
465. Reinke, L.F.; Vig, E.K.; Tartaglione, E.V.; Backhus, L.M.; Gunnink, E.; Au, D.H. Protocol and Pilot Testing: The Feasibility and Acceptability of a Nurse-Led Telephone-Based Palliative Care Intervention for Patients Newly Diagnosed with Lung Cancer. *Contemp. Clin. Trials* **2018**, *64*, 30–34, doi:10.1016/j.cct.2017.11.013.
466. Reintjes, W.; Romijn, M.D.M.; Hollander, D.; Ter Bruggen, J.P.; van Marum, R.J. Reversible Dementia: Two Nursing Home Patients with Voltage-Gated Potassium Channel Antibody-Associated Limbic Encephalitis. *J Am Med Dir Assoc* **2015**, *16*, 790–794, doi:10.1016/j.jamda.2015.06.008.
467. Rhondali, W.; Hui, D.; Kim, S.H.; Kilgore, K.; Kang, J.H.; Nguyen, L.; Bruera, E. Association between Patient-Reported Symptoms and Nurses' Clinical Impressions in Cancer Patients Admitted to an Acute Palliative Care Unit. *J. Palliative Med.* **2012**, *15*, 301–307, doi:10.1089/jpm.2011.0403.

468. Riese, C.; Weiß, B.; Borges, U.; Beylich, A.; Dengler, R.; Hermes-Moll, K.; Welslau, M.; Baumann, W. Effectiveness of a Standardized Patient Education Program on Therapy-Related Side Effects and Unplanned Therapy Interruptions in Oral Cancer Therapy: A Cluster-Randomized Controlled Trial. *Supportive Care Cancer* **2017**, *25*, 3475–3483, doi:10.1007/s00520-017-3770-0.
469. Rigler, S.K.; Shireman, T.I.; Kallenbach, L. Predictors of Long-Acting Opioid Use and Oral versus Transdermal Route among Older Medicaid Beneficiaries. *Am J Geriatr Pharmacother* **2007**, *5*, 91–99, doi:10.1016/j.amjopharm.2007.05.002.
470. Roder, D.; Bonett, A.; Hunt, R.; Beare, M. Where Patients with Cancer Die in South Australia. *Med. J. Aust.* **1987**, *147*, 11–13.
471. Rodin, M.B. Should You Screen Nursing Home Residents for Cancer? *J Geriatr Oncol* **2017**, *8*, 154–159, doi:10.1016/j.jgo.2016.10.005.
472. Romanoski M Letter to the Editor. *Plastic Surgical Nursing* **2005**, *25*, 115–115.
473. Rosenberg, K. JOURNAL Watch. *AJN American Journal of Nursing* **2015**, *115*, 56–57.
474. Rossi, N.A.; Rawl, J.W.; Chaaban, M.R. Retroperitoneal Hematoma as a Complication of Endovascular Embolization of Tumor Epistaxis. *Otolaryngol. Head Neck Surg.* **2020**, *163*, P302, doi:10.1177/0194599820934781.
475. Roulston, A.; Campbell, A.; Cairnduff, V.; Fitzpatrick, D.; Donnelly, C.; Gavin, A. Bereavement Outcomes: A Quantitative Survey Identifying Risk Factors in Informal Carers Bereaved through Cancer. *Palliative Medicine* **2017**, *31*, 162–170, doi:10.1177/0269216316649127.
476. Rudel RJ On Breast Cancer Detection, Directors of Nursing and Female Residents: A Study in Rural Long-Term Care. *Online Journal of Rural Nursing & Health Care* **2007**, *7*, 21–35, doi:10.14574/ojrnhc.v7i2.135.
477. Ruelle, L.; Deyi, V.Y.M.; Konopnicki, D.; Dauby, N. *Saccharomyces Cerevisiae* Fungemia: Risk Factors, Outcome and Link with Entérol® Administration. *Acta Clin. Belg. Int. J. Clin. Lab. Med.* **2018**, *73*, 8, doi:10.1080/17843286.2018.1538724.
478. Rys, S.; Mortier, F.; Deliens, L.; Bilsen, J. The Practice of Continuous Sedation until Death in Nursing Homes in Flanders, Belgium: A Nationwide Study. *J Am Geriatr Soc* **2014**, *62*, 1869–1876, doi:10.1111/jgs.13073.
479. Saad, M.; Matteucci, P. The Use of Electrochemotherapy (ECT) in the Management of Malignant Melanoma in the Clinically Frail Patient: A Case Report. *Eur. J. Plast. Surg.* **2020**, *43*, 855–858, doi:10.1007/s00238-020-01641-z.
480. Saad, T.F. Controversies in Management of Central Vein Stenosis Associated with Cardiac Rhythm Management Device (CRMD) Leads: There Are Times to Stent over That Lead! *J. Vasc. Access* **2010**, *11*, 233–234.
481. Saadat, L.V.; Mahvi, D.A.; Jolissaint, J.S.; Urman, R.D.; Gold, J.S.; Whang, E.E. Discharge Destination Following Rectal Cancer Resection: An Analysis of Preoperative and Intraoperative Factors. *Int J Colorectal Dis* **2020**, *35*, 249–257, doi:10.1007/s00384-019-03487-9.
482. Sadrzadeh, H.; Souidi, A. Acute Bleeding in an 80 Year Old Male: An Uncommon Diagnosis. *J. Am. Geriatr. Soc.* **2019**, *67*, S106, doi:10.1111/jgs.15898.
483. Saenz, H.; Motarjemi, R. Undiagnosed Secondary Adrenal Insufficiency a Life-Threatening Risk for Surgical Patients. *J. Am. Geriatr. Soc.* **2020**, *68*, S106, doi:10.1111/jgs.16431.
484. Saleem, S.; Shah, E.; Abbas, S.M.; Knight, C. From Pseudohypoglycemia to Diabetic Ketoacidosis. *J. Gen. Intern. Med.* **2019**, *34*, S538, doi:10.1007/11606.1525-1497.
485. Saltbæk, L.; Karlsen, R.V.; Bidstrup, P.E.; Høeg, B.L.; Zoffmann, V.; Horsbøl, T.A.; Holländer, N.H.; Svendsen, M.N.; Christensen, H.G.; Dalton, S.O.; et al. MyHealth: Specialist Nurse-Led Follow-up in Breast Cancer. A Randomized Controlled Trial—Development and Feasibility. *Acta Oncol.* **2019**, *58*, 619–626, doi:10.1080/0284186X.2018.1563717.
486. Schafer, S. Oral Cancer Screening in the Nursing Home. *Alumni Bull Sch Dent Indiana Univ* **1977**, *35–36*, 110.
487. Schenker, N.; Gentleman, J.F.; Rose, D.; Hing, E.; Shimizu, I.M. Combining Estimates from Complementary Surveys: A Case Study Using Prevalence Estimates from National Health Surveys of Households and Nursing Homes. *Public Health Rep* **2002**, *117*, 393–407, doi:10.1093/phr/117.4.393.
488. Schols, M.G.A. Sleep problems in the nursing home. *Tijdschr. Verpleeghuisgeneeskde.* **1998**, *22*, 3–6.
489. Schuster, T.G.; Hollingsworth, J.M.; Wei, J.T. Use of the “Decoy” Catheter to Prevent Traumatic Foley Removal. *Clin. Geriatr.* **2005**, *13*, 37–38.
490. Senan, S.; Haasbeek, C.J.; Antonisse, M.E.; Slotman, B.J.; Lagerwaard, F.J. Outcomes of Stereotactic Body Radiotherapy (SBRT) in 175 Patients with Stage I NSCLC Aged 75 Years and Older. *J. Clin. Oncol.* **2009**, *27*, 9545.
491. Seow, H.; Tanuseputro, P.; Barbera, L.; Earle, C.; Guthrie, D.; Isenberg, S.; Juergens, R.; Myers, J.; Brouwers, M.; Sutradhar, R. Development and Validation of a Prognostic Survival Model With Patient-Reported Outcomes for Patients With Cancer. *JAMA Network Open* **2020**, *3*, e201768–e201768, doi:10.1001/jamanetworkopen.2020.1768.
492. Sfeir, J.G.; Smith, K.M.; Surkis, W.D.; Tavani, D.M.; El-Hajj, R.J. Evaluation of Osteoporosis in Patients Admitted with Fragility Fractures at the Lankenau Medical Center. *Endocr. Rev.* **2016**, *37*, doi:10.1210/endo-meetings.2016.EHDE.1.SUN-768.
493. Shah, S.; Tartaro, C.; Chew, F.; Morris, M.; Wood, C.; Wuzzardo, A. Rehabilitation Efficiency and Effectiveness in Medical-Surgical Conditions: A Pilot Study of 234 Patients. *Physical & Occupational Therapy in Geriatrics* **2012**, *30*, 288–300, doi:10.3109/02703181.2012.731481.
494. Shankpal, P. Nurses for Cancer Prevention: Economics of Respiratory Cancer Projects. *Supportive Care Cancer* **2011**, *19*, S117–S118, doi:10.1007/s00520-011-1184-y.
495. Shapero, T.F.; Alexander, P.E.; Hoover, J.; Burgis, E.; Schabas, R. Colorectal Cancer Screening: Video-Reviewed Flexible Sigmoidoscopy by Nurse Endoscopist - A Canadian Community-Based Perspective. *Can. J. Gastroenterol.* **2001**, *15*, 441–445.
496. Sharif, S.; Oh, H. Is Autoimmunity the Common Factor amongst Chronic Inflammatory Demyelinating Polyneuropathy, Amyotrophic Lateral Sclerosis and Psychiatric Disorders? *J. Am. Geriatr. Soc.* **2019**, *67*, S279, doi:10.1111/jgs.15898.

497. Sharp, L.; Foll, P.; Deady, S.; O’Ceilleachair, A.; Buicke, C.; Carsin, A.E. Where Do People with Lung Cancer Die and How Is This Changing? A Population-Based Study. *Ir Med J* **2010**, *103*, 262–264, 266.
498. Shaya, F.; Aljawadi, M.H.; Daniel Mullins, C.; Pandya, N.; Seal, B.; Hanna, N. Determinants of Trans-Arterial Chemoembolization (TACE) Treatments among Patients with Hepatocellular Carcinoma within Seermedicare. *Hepatology* **2011**, *54*, 594A, doi:10.1002/hep.24666.
499. Sherratt, A.; Skinn, E.; Gardiner, A. Gastrointestinal Cancers: An Update for Nurses. *Nursing & Residential Care* **2013**, *15*, 206–209, doi:10.12968/nrec.2013.15.4.206.
500. Sherwood PR; Given BA; Scholnik A; Given CW To Refer or Not to Refer: Factors That Affect Primary Care Provider Referral of Patients with Cancer to Clinical Treatment Trials. *Journal of Cancer Education* **2004**, *19*, 58–65, doi:10.1207/s15430154jce1901\_13.
501. Shugarman, L.R.; Bird, C.E.; Schuster, C.R.; Lynn, J. Age and Gender Differences in Medicare Expenditures at the End of Life for Colorectal Cancer Decedents. *J Womens Health (Larchmt)* **2007**, *16*, 214–227, doi:10.1089/jwh.2006.0012.
502. Shuman, A.G.; Korc-Grodzicki, B.; Shklar, V.; Palmer, F.; Shah, J.P.; Patel, S.G. A New Care Paradigm in Geriatric Head and Neck Surgical Oncology. *J Surg Oncol* **2013**, *108*, 187–191, doi:10.1002/jso.23370.
503. Sieberth, E. [Report of 111 patients with multiple cancers of the first medical department of the Vienna-Lainz nursing home 1981–1987]. *Wien Klin Wochenschr* **1992**, *104*, 551–562.
504. Siegmund, L.A. Social Media in Occupational Health Nursing: Helpful or Harmful? *Workplace Health Saf* **2020**, *68*, 408–414, doi:10.1177/2165079920935779.
505. Sikorskii, A.; Given, C.W.; Siddiqi, A.-E.-A.; Champion, V.; McCorkle, R.; Spoelstra, S.L.; Given, B.A. Testing the Differential Effects of Symptom Management Interventions in Cancer. *Psycho-Oncology* **2015**, *24*, 25–32, doi:10.1002/pon.3555.
506. Silver, S.A.; Harel, Z.; McArthur, E.; Nash, D.M.; Acedillo, R.R.; Kitchlu, A.; Garg, A.X.; Chertow, G.M.; Wald, R. Causes of Death in Patients Who Survive a Hospitalization with AKI. *J. Am. Soc. Nephrol.* **2017**, *28*, 99.
507. Singh, A.; Braun, D.S. A Case of Patient with Stage vi Hepatocellular Carcinoma with Metastasis to the Spine Presenting with Acute Neurological Symptoms. *Am. J. Gastroenterol.* **2020**, *115*, S1405, doi:10.14309/01.ajg.0000712780.77839.9e.
508. Singh Joy SD Journal Watch. *AJN American Journal of Nursing* **2010**, *110*, 59–60.
509. Singh, S.; Eguchi, M.; Min, S.-J.; Fischer, S. Outcomes of Patients with Cancer Discharged to a Skilled Nursing Facility after Acute Care Hospitalization. *JNCCN J. Nat. Compr. Cancer Netw.* **2020**, *18*, 856–865, doi:10.6004/JNCCN.2020.7534.
510. Singh, S.R.K.; Malapati, S.; Kumar, R.; Lupak, O.; Kuriakose, P. Predictors of Transfer to Different Facility at Discharge in Patients Admitted with Hematologic Malignancy: A Nationwide Inpatient Sample (NIS) Database Analysis. *Blood* **2019**, *134*, doi:10.1182/blood-2019-127604.
511. Smith, C.B.; Bonomi, M.; Mhango, G.; Wisnivesky, J. Outcomes of Elderly Patients with Stage IIIB–IV Non-Small Cell Lung Cancer Admitted to the Intensive Care Unit. *Am. J. Respir. Crit. Care Med.* **2011**, *183*.
512. Smith MK Implementing Annual Cancer Screenings for Elderly Women. *Journal of Gerontological Nursing* **1995**, *12*–17.
513. Smith, P.M.; Reilly, K.R.; Miller, N.H.; DeBusk, R.F.; Taylor, C.B. Application of a Nurse-Managed Inpatient Smoking Cessation Program. *Nicotine Tob. Res.* **2002**, *4*, 211–222, doi:10.1080/14622200210123590.
514. Smith, S. Elderly See Themselves as in Good Health and Largely Independent. *PUBLIC HEALTH REP.* **1993**, *108*, 408–409.
515. Soliz, M.K.; Merai, P.G. A Millennial Caring for a Septuagenarian with Dementia. *J. Am. Geriatr. Soc.* **2018**, *66*, S180, doi:10.1111/jgs.15376.
516. Sperl-Hillen, J.M.; Anderson, J.P.; Haapala, J.; Chumba, L.; Ekstrom, H.; Appana, D.; Desilva, M.B.; O’connor, P.J. Better Care Strategies Are Necessary to Address Poor Medication Adherence. *Diabetes* **2020**, *69*, doi:10.2337/db20-1180-P.
517. Springer, S.; Mor, M.; Zhang, S.; Sileanu, F.; Zhao, X.; Aspinall, S.; Ersek, M.; Hanlon, J.; Hunnicutt, J.; Niznik, J.; et al. Prevalence and Factors Predicting Aspirin Use for Secondary Prevention in Veteran Affairs (VA) Nursing Home Residents with Limited Life Expectancy on Admission. *J. Am. Geriatr. Soc.* **2019**, *67*, S223, doi:10.1111/jgs.15898.
518. Staats DO Geriatric Gynecology in Long-Term Care Settings. *Annals of Long Term Care* **2000**, *8*, 52–58.
519. Stark, L.L.; Tofthagen, C.; Visovsky, C.; McMillan, S.C. The Symptom Experience of Patients with Cancer. *Journal of Hospice & Palliative Nursing* **2012**, *14*, 61–70, doi:10.1097/NJH.0b013e318236de5c.
520. Stein, W.M.; Min, Y.K. Nebulized Morphine for Paroxysmal Cough and Dyspnea in a Nursing Home Resident with Metastatic Cancer. *Am J Hosp Palliat Care* **1997**, *14*, 52–56, doi:10.1177/104990919701400201.
521. Suskind, A.M.; Zhao, S.; Boscardin, W.J.; Smith, A.; Finlayson, E. Time Spent Away from Home in the Year Following High-Risk Cancer Surgery in Older Adults. *J Am Geriatr Soc* **2020**, *68*, 505–510, doi:10.1111/jgs.16344.
522. Talley, K.M.C.; Wyman, J.F.; Savik, K.; Kane, R.L.; Mueller, C.E.; Hong Zhao Restorative Care’s Effect on Activities of Daily Living Dependency in Long-Stay Nursing Home Residents. *Gerontologist* **2015**, *55*, S88–S98, doi:10.1093/geront/gnv011.
523. Tanoue, N.; Ummah, F.C.; Hanada, T.; Takajo, T.; Kamil, M.; Askoro, R.; Arita, K. Incidentally Found Primary Cerebral Malignant Melanoma Associated with Ota Nevus-Wide Dissemination after an Initial Phase of Slow Growth. *Hiroshima J. Med. Sci.* **2018**, *67*, 21–29.
524. Tathanhlong, L.; Bristow, B.; McGuffin, M. Providing Supportive Care for Young Breast Cancer Patients: Exploring the Comfort Level and Educational Needs of the Interprofessional Health Care Team at a Comprehensive Cancer Centre. *J. Med. Imaging Radiat. Sci.* **2015**, *46*, S69–S74, doi:10.1016/j.jmir.2015.04.015.

525. Taub, D.A.; Dunn, R.L.; Miller, D.C.; Wei, J.T.; Hollenbeck, B.K. Discharge Practice Patterns Following Cystectomy for Bladder Cancer: Evidence for the Shifting of the Burden of Care. *J Urol* **2006**, *176*, 2612–7; discussion 2617–2618, doi:10.1016/j.juro.2006.07.150.
526. Teggi, D. Care Homes as Hospices for the Prevalent Form of Dying: An Analysis of Long-Term Care Provision towards the End of Life in England. *Social Science & Medicine* **2020**, *260*, N.PAG–N.PAG, doi:10.1016/j.socscimed.2020.113150.
527. Tekin, N. An Example of Support Program to Elderly Patient and Elderly Relative during the Terminal Period in a Developed Model of Residential Home and Geriatric Care Center Gelişmiş Bir Dinlenme ve Bakımevi Modelinde Terminal Dönem Yaşlı Olgu ve Yaşlı Yakınına Destek Programı Örneği. *Türk Geriatr. Derg.* **2011**, *14*, 273–275.
528. Teno, J.M.; Kabumoto, G.; Wetle, T.; Roy, J.; Mor, V. Daily Pain That Was Excruciating at Some Time in the Previous Week: Prevalence, Characteristics, and Outcomes in Nursing Home Residents. *J Am Geriatr Soc* **2004**, *52*, 762–767, doi:10.1111/j.1532-5415.2004.52215.x.
529. Tharackal Ravindran, R.; Starr, R. Acute Generalized Exanthematous Pustulosis in an Elderly Female. *J. Am. Geriatr. Soc.* **2013**, *61*, S136, doi:10.1111/jgs.12263.
530. Thompson, C. A Job to Do. *Nursing* **1989**, *19*, 65, doi:10.1097/00152193-198912000-00028.
531. Thorpe, C.T.; Mor, M.; Zhang, S.; Sileanu, F.; Zhao, X.; Aspinall, S.; Ersek, M.; Hanlon, J.; Hunnicutt, J.; Niznik, J.; et al. Statin Discontinuation in Veterans Affairs (va) Nursing Home Residents with Limited Life Expectancy. *J. Am. Geriatr. Soc.* **2019**, *67*, S90, doi:10.1111/jgs.15898.
532. Thorpe, T.; Vilches-Moraga, A.; Fox, J.; Feilding, E.; Peeroo, M.K.; Wardle, K.; Alio, Z.R. Emergency Laparotomy in the Older Patient. Perioperative Care of Older People Undergoing Surgery-Salford General Surgery (POPS-SG). *Eur. Geriatr. Med.* **2015**, *6*, S151.
533. Tian G; Zhu Y; Qi L; Guo F; Xu H; Tian, G.; Zhu, Y.; Qi, L.; Guo, F.; Xu, H. Efficacy of Multifaceted Interventions in Reducing Complications of Peripherally Inserted Central Catheter in Adult Oncology Patients. *Supportive Care in Cancer* **2010**, *18*, 1293–1298, doi:10.1007/s00520-009-0747-7.
534. Topçu, B.; Vatan, V. Comparison of Endoscopic Diagnosis and Histopathological Results of Patients with a Preliminary Diagnosis of Malignancy and the Role of the Nurse in Planning. *Prog. Nutr.* **2020**, *22*, doi:10.23751/pn.v22i2-S.10171.
535. Traeger, L.; Pirl, W.F. Approaching the Treatment of Depression in Elderly Cancer Patients. *Aging Health* **2010**, *6*, 393–403, doi:10.2217/ahe.10.24.
536. Tramini, P.; Montal, S.; Valcarcel, J. Tooth Loss and Associated Factors in Long-Term Institutionalised Elderly Patients. *Gerodontology* **2007**, *24*, 196–203, doi:10.1111/j.1741-2358.2007.00183.x.
537. Triantos, D. Intra-Oral Findings and General Health Conditions among Institutionalized and Non-Institutionalized Elderly in Greece. *J. Oral Pathol. Med.* **2005**, *34*, 577–582, doi:10.1111/j.1600-0714.2005.00356.x.
538. Trtchounian, A.; Aberger, K.; Nelson, J. Early Palliative Care Consultation Associated with Decreased Length of Stay. *Ann. Emerg. Med.* **2017**, *70*, S115.
539. Trujillo Vilchez, R.; Morgado Bermejo, N.; Pozo Villa, R.; Lapeira Cabello, J.M.; Gómez Thébaut, A.; Rosúa Rodríguez, M.; Villalba Merchán, O.A.; Romero Montero, E.; Ortega Morell, A.; De La Ossa Sendra, M.J.; et al. Experience with the CUDECA Foundation palliative care program. *Med. Paliativa* **2007**, *14*, 217–221.
540. Tschopp, J.M.; Brutsche, M.; Frey, J.G.; Tatti, B.; Aymon, E.; Spiliopoulos, A. [Thoracic surgery for non-small cell lung cancer. Cost-benefit of its management in specialized intermediate care]. *Swiss Surg Suppl* **1996**, Suppl 1, 46–51.
541. Tseng, O.; Spinelli, J.; Gotay, C.; McBride, M.; Dawes, M. Utilization of Bone Mineral Density Testing among Breast Cancer Survivors in British Columbia, Canada. *Osteoporosis International* **2017**, *28*, 3439–3449, doi:10.1007/s00198-017-4218-6.
542. Tseng, Y.-P.; Huang, L.-H.; Huang, T.-H.; Hsu, L.-L.; Hsieh, S.-I. Factors Associated With the Do-Not-Resuscitate Decision Among Surrogates of Elderly Residents at a Nursing Home in Taiwan. *Int. J. Gerontol.* **2017**, *11*, 95–99, doi:10.1016/j.ijge.2016.07.004.
543. Tur-Sinai, A.; Urban, D.; Bentur, N. Out-of-pocket Spending of Deceased Cancer Patients in Five European Countries and Israel. *European Journal of Cancer Care* **2021**, *30*, 1–6, doi:10.1111/ecc.13372.
544. Ugbarugba, E.E.; Stanfill, C.; Aninyei, E. A Case of Hepatic Inflammatory Pseudotumor. *Am. J. Gastroenterol.* **2017**, *112*, S1189, doi:10.1038/ajg.2017.321.
545. Ursem, C.J.; Diaz-Ramirez, L.G.; Lang-Brown, S.; Wei, X.X.; Chen, R.C.; Lee, S. Association of Changes in Functional Status with Radiation for Prostate Cancer in Older Veterans. *J. Clin. Oncol.* **2018**, *36*, doi:10.1200/JCO.2018.36.6\_suppl.148.
546. van Ballegooijen, M.; Koopmanschap, M.A.; Tjokkwardojo, A.J.; van Oortmarssen, G.J. Care and Costs for Advanced Cervical Cancer. *Eur. J. Cancer* **1992**, *28A*, 1703–1708, doi:10.1016/0959-8049(92)90072-a.
547. Van Der Heide, A.; Rietjens, J.; Onwuteaka-Philipsen, B.; Van Delden, J. Developments in the Practice of Palliative Sedation in The Netherlands (2005–2015). *Palliative Med.* **2018**, *32*, 26, doi:10.1177/0269216318769196.
548. van der Plas, A.G.M.; Oosterveld-Vlug, M.G.; Pasma, H.R.W.; Onwuteaka-Philipsen, B.D. Relating Cause of Death with Place of Care and Healthcare Costs in the Last Year of Life for Patients Who Died from Cancer, Chronic Obstructive Pulmonary Disease, Heart Failure and Dementia: A Descriptive Study Using Registry Data. *Palliative Medicine* **2017**, *31*, 338–345, doi:10.1177/0269216316685029.
549. Van Rij, S.; Andrews, A.W.; Freund, J.; Bailey, S. Multimodal Rehabilitation Following Gliosarcoma Resection: A Case Report. *Rehabil. Oncol.* **2021**, *39*, 56–63, doi:10/9701.REO.0000000000000206.



550. Vetto JT; Petty JK; Dunn N; Prouser NC; Austin DF Structured Clinical Breast Examination (CBE) Training Results in Objective Improvement in CBE Skills. *Journal of Cancer Education* **2002**, *17*, 124–127.
551. Vetto JT; Prouser NC; Flemming DW; Hedberg KM Assessing the Need for Clinical Breast Examination (CBE) Training: The Oregon Experience. *Journal of Cancer Education* **2000**, *15*, 209–213.
552. Viele, C.S. Diagnosis, Treatment, and Nursing Care of Acute Leukemia. *Semin Oncol Nurs* **2003**, *19*, 98–108.
553. Vilches-Moraga, A.; Fox, J.; Paracha, A.; Gomez-Quintanilla, A.; Maevis, T.; Epstein, J.; Thomson, A.M. Baseline Characteristics and Clinical Outcomes of Older Patients Admitted as an Emergency to General Surgical Wards. Salford-POPS – GS. *Eur. Geriatr. Med.* **2017**, *8*, 499–504, doi:10.1016/j.eurger.2017.07.012.
554. Vondeling, A.; Hazen, J.; Van Huis Tanja, L.; Schiphorst, A.; Dekker, J.; Hamaker, M. FACTORS ASSOCIATED WITH SURVIVAL IN ELDERLY PATIENTS WITH STAGE I–III COLORECTAL CARCINOMA IN THE NETHERLANDS MANAGED WITH NON-CURATIVE INTENT. *J. Geriatr. Oncol.* **2019**, *10*, S31–S32, doi:10.1016/S1879-4068(19)31168-3.
555. Wachtel, T.J.; Derby, C.; Fulton, J.P. Predicting the Outcome of Hospitalization for Elderly Persons: Home versus Nursing Home. *South. Med. J.* **1984**, *77*, 1283–1285, 1290, doi:10.1097/00007611-198410000-00020.
556. Wagg, A.; Staskin, D.; Engel, E.; Herschorn, S.; Kristy, R.M.; Schermer, C.R. A Phase 4, Double-Blind, Randomized, Placebo-Controlled, Parallel Group, Multi-Centre Study to Evaluate the Efficacy, Safety, and Tolerability of Mirabegron in Older Adult Patients with Overactive Bladder Syndrome (Pillar). *Neurourol. Urodyn.* **2018**, *37*, S215–S216.
557. Wahler, R.G.; Reiman, A.T.; Schrader, J.V. Use of Compounded Dextromethorphan-Quinidine Suspension for Pseudobulbar Affect in Hospice Patients. *Journal of Palliative Medicine* **2017**, *20*, 294–297, doi:10.1089/jpm.2016.0277.
558. Walling, A.M.; D’Ambruoso, S.F.; Malin, J.L.; Hurvitz, S.; Zisser, A.; Coscarelli, A.; Clarke, R.; Hackbarth, A.; Pietras, C.; Watts, F.; et al. Effect and Efficiency of an Embedded Palliative Care Nurse Practitioner in an Oncology Clinic. *J. Oncol. Pract.* **2017**, *13*, e792–e799, doi:10.1200/JOP.2017.020990.
559. Walter, J.; Tufman, A.; Schwarzkopf, L. Are Elderly Lung Cancer Patients Treated Differently? Results from a German Claims Data Analysis. *Pneumologie* **2018**, *72*, doi:10.1055/s-0037-1619215.
560. Wang, B.; Hylwka, T.; Smieja, M.; Surette, M.; Bowdish, D.M.E.; Loeb, M. Probiotics to Prevent Respiratory Infections in Nursing Homes: A Pilot Randomized Controlled Trial. *Journal of the American Geriatrics Society* **2018**, *66*, 1346–1352, doi:10.1111/jgs.15396.
561. Wang, H.; Qiu, F.; Boilesen, E.; Nayar, P.; Lander, L.; Watkins, K.; Watanabe-Galloway, S. Rural-Urban Differences in Costs of End-of-Life Care for Elderly Cancer Patients in the United States. *Journal of Rural Health* **2016**, *32*, 353–362, doi:10.1111/jrh.12160.
562. Ward-Smith P Abstracts. *Urologic Nursing* **2009**, *29*, 264–266.
563. Warren, G.; Shah, N.; Crossley, H.; Dailey, S.; Hafez, K.; He, C.; Tallman, C.; Montgomery, J.; Weizer, A.; Lee, C. Hospital Discharge Status of Elderly Patients Treated with Radical Cystectomy for Bladder Cancer. *J. Urol.* **2013**, *189*, e724, doi:10.1016/j.juro.2013.02.2891.
564. Wergeland Sørbye, L.; Steindal, S.A.; Kalfoss, M.H.; Vibe, O.E. Opioids, Pain Management, and Palliative Care in a Norwegian Nursing Home From 2013 to 2018. *Health Services Insights* **2019**, *12*, N.PAG-N.PAG, doi:10.1177/1178632919834318.
565. Weyer, C.; Zeitouni, N.C.; Jackson, J.R. Three-Stage Reconstruction of a Nasal Defect. *Dermatol. Surg.* **2018**, *44*, 1611–1614, doi:10.1097/DSS.0000000000001487.
566. Wick, J.Y.; Zanni, G.R. Aging in Place: Multiple Options, Multiple Choices. *Consult Pharm* **2009**, *24*, 804–806, 808, 811–812, doi:10.4140/tcp.n.2009.804.
567. Wijnia JW; Corstiaensen IJP A Poor Prognosis: Guide or Misleading? *American Journal of Hospice & Palliative Medicine* **2008**, *25*, 5–8, doi:10.1177/1049909107307379.
568. Wildiers, H.; Mauer, M.; Elseviers, M.; De Wolf, J.; Hatse, S.; Hamaker, M.; Buntinx, F.; De Lepeleire, J.; Uytterschaut, G.; Falandry, C.; et al. Cancer Events in Belgian Nursing Home Residents: An EORTC Prospective Cohort Study. *J Geriatr Oncol* **2019**, *10*, 805–810, doi:10.1016/j.jgo.2019.03.005.
569. Williams, G.R.; Dunham, L.; Chang, Y.; Deal, A.M.; Pergolotti, M.; Lund, J.L.; Guerard, E.J.; Kenzik, K.; Muss, H.B.; Sanoff, H.K. Geriatric Assessment to Predict Hospitalization Frequency and Long-Term Care Utilization in Older Adult Cancer Survivors. *J. Clin. Oncol.* **2018**, *36*, doi:10.1200/JCO.2018.36.15-suppl.10036.
570. Wilson, D.M.; Truman, C.D. Research Note: Describing Canada’s Residential Continuing Care Population through an Analysis of a National Mortality Dataset and a Provincial Hospital Dataset. *Can. J. Aging* **2003**, *22*, 127–131, doi:10.1017/S0714980800003780.
571. Wilson, K.B.; Ardoin, K.B. When Professional and Personal Worlds Meet: Nurse as Daughter. *MEDSURG Nursing* **2013**, *22*, 192–196.
572. Wu, J.H.; Guo, Z.; Berman, R.; Coric, V.; Kumar, S.; Radhakrishnan, M. Risk of Non-Melanoma Skin Cancer in Elderly Patients with Alzheimer’s Disease. *Pharmacoepidemiol. Drug Saf.* **2011**, *20*, S303–S304, doi:10.1002/pds.2206.
573. Wu, J.; Mafham, M.; Mamas, M.A.; Rashid, M.; Kontopantelis, E.; Deanfield, J.E.; de Belder, M.A.; Gale, C.P. Place and Underlying Cause of Death During the COVID-19 Pandemic: Retrospective Cohort Study of 3.5 Million Deaths in England and Wales, 2014 to 2020. *Mayo Clin Proc* **2021**, *96*, 952–963, doi:10.1016/j.mayocp.2021.02.007.
574. Wu, J.; Quill, T. Geriatric Rehabilitation and Palliative Care. *Topics in Geriatric Rehabilitation* **2011**, *27*, 29–35, doi:10.1097/TGR.0b013e3181ff6844.

575. Wu, J.; Quill, T. Geriatric Rehabilitation and Palliative Care. *Topics in Geriatric Rehabilitation* **2011**, *27*, 29–35, doi:10.1097/TGR.Ob013e3181ff6844.
576. Xiong, B.; Freeman, S.; Banner, D.; Spigione, L. Hospice Use and One-Year Survivorship of Residents in Long-Term Care Facilities in Canada: A Cohort Study. *BMC Palliative Care* **2019**, *18*, N.PAG-N.PAG, doi:10.1186/s12904-019-0480-z.
577. Yadav, N.R.; Jain, M.; Sharma, A.; Yadav, R.; Pahuja, M.; Jain, V. Distribution and Prevalence of Oral Mucosal Lesions in Residents of Old Age Homes in Delhi, India. *Nepal J. Epidemiol.* **2018**, *8*, 727–734, doi:10.3126/nje.v8i2.18708.
578. Yang, A.; Lall, C.; Bhargava, P.; Imagawa, D. Limited Utility of Plain Abdominal Radiographs in Evaluating Intussusceptions Secondary to Long Indwelling Feeding Tubes. *J. Clin. Imaging Sci.* **2013**, *3*, doi:10.4103/2156-7514.107994.
579. Yong, C.; Onukwugha, E.; Mullins, C.D.; Seal, B.; Hussain, A. The Use of Health Services among Elderly Patients with Stage IV Prostate Cancer in the Initial Period Following Diagnosis. *J Geriatr Oncol* **2014**, *5*, 290–298, doi:10.1016/j.jgo.2014.04.001.
580. Zanni, G.R.; Wick, J.Y.; Walker, B.L. Sexual Health and the Elderly. *Consult. Pharm.* **2003**, *18*, 310–322.
581. Zavaroni, C. Home Care and Short-Run Nursing Homes: Organizational Aspects of Their Integration with Oncological Organizations. *Crit. Rev. Oncol. Hematol.* **2001**, *39*, 247–267, doi:10.1016/s1040-8428(00)00118-9.
582. Zenimoto, M.; Kita, M.; Arai, T.; Murayama, T.; Mori, M. [Free/total prostate specific antigen ratio (%PSA) to predict probability of prostate cancer]. *Rinsho Byori* **2003**, *51*, 969–973.
583. Zweig, S. Bert's Dad. *J. Am. Med. Dir. Assoc.* **2002**, *3*, 278–279, doi:10.1016/S1525-8610(04)70495-8.
584. Hospital Services for Selected Chronic Disease Patients. *ABSTR. HOSP. MANAGE. STUD.* **1974**, *11*, 11965 CH:706p.
585. Optimal Criteria for Care of Patients with Cancer. *JAMA* **1974**, *227*, 57–63.
586. Case Presentation 2 (1990): The Unsafe Hospital Discharge -- Responses by the Hartford Hospital's HEC and the Patient's Hospital's HEC. *HEC Forum* **1990**, *2*, 279–284.
587. [Methods and instruments of nursing research: An analysis of some articles]. *Riv Infirm* **1993**, *12*, 29–32.
588. '97 TNA House Resolutions. *Texas Nursing* **1997**, *71*, 7–10.
589. Pain in Nursing-Home Cancer Patients Often Goes Untreated. *Am J Health Syst Pharm* **1998**, *55*, 1544, 1548, doi:10.1093/ajhp/55.15.1544.
590. Position of the American Dietetic Association: Oral Health and Nutrition. *Journal of the American Dietetic Association* **2003**, *103*, 615–625, doi:10.1053/jada.2003.50130.
591. Web Watch. *Case Manager* **2004**, *15*, 20–21.
592. EONS News 9.3. *European Journal of Oncology Nursing* **2005**, *9*, 199–201.
593. In Brief. *BMJ: British Medical Journal (International Edition)* **2006**, *332*, 928–928, doi:10.1136/bmj.332.7547.928.
594. Discussions. *Ann. Surg.* **2008**, *248*, 465–467, doi:10.1097/SLA.0b013e318185e1b3.
595. When the System Fails an Elderly Patient. *Ann. Long-Term Care* **2008**, *16*, 12–13.
596. 2008 SNRS Abstracts -- B. *Southern Online Journal of Nursing Research* **2008**, *8*, 2–2.
597. 2008 SNRS Abstracts -- I - K. *Southern Online Journal of Nursing Research* **2008**, *8*, 7–7.
598. 2008 SNRS Abstracts -- N - Q. *Southern Online Journal of Nursing Research* **2008**, *8*, 10–10.
599. Abstracts of the 2011 Joanna Briggs Institute International Convention...7–9 November 2011, National Wine Centre, Adelaide, South Australia. *International Journal of Evidence-Based Healthcare* **2011**, *9*, 282–334, doi:10.1111/j.1744-1609.2011.00182.x.
600. Cancer Often Goes Untreated in Nursing Home Residents. *Community Oncology* **2011**, *8*, 557–557.
601. MINERVA. *BMJ: British Medical Journal (Overseas & Retired Doctors Edition)* **2012**, *345*, 50–50.
602. Looking for More Meal Appeal. *Nursing* **2012**, *42*, 10–10.
603. 9th Congress of the EUGMS. *Eur. Geriatr. Med.* **2013**, *4*.
604. Singapore Health and Biomedical Congress, SHBC 2013. *Ann. Acad. Med. Singapore* **2013**, *42*, S1.
605. Poster Abstracts - Post Acute and Long Term Care Medicine 2018. *J. Am. Med. Informatics Assoc.* **2018**, *19*.

Table S4. Characteristics of studies, investigation.

| Authors - Year              | Population                                                                                         | Object                                                                           | Setting                 | Design                                 | Inclusion Criteria                                                                               | Intervention                           | Main Outcome Measures                                             | Results                                                                                                 | Principal Source of Bias |
|-----------------------------|----------------------------------------------------------------------------------------------------|----------------------------------------------------------------------------------|-------------------------|----------------------------------------|--------------------------------------------------------------------------------------------------|----------------------------------------|-------------------------------------------------------------------|---------------------------------------------------------------------------------------------------------|--------------------------|
| Koroukian et al. – 2007 [1] | 4,404 breast cancer patients, 5,334 prostate cancer patients, and 4,822 colorectal cancer patients | Complexity of Care Needs and Unstaged Cancer in Elders: A Population-Based Study | Nursing homes, Ohio, US | Cross-sectional population-based study | All 65 years or older diagnosed with breast, prostate or colorectal cancer, during the year 2000 | Info from databases OCISS, OASIS, MDS. | Occurrence of unstaged cancer and complexity of care needs (COCN) | Proportion of unstaged cases was 7.6% among breast, 16.9% for prostate, and 13.8% for colorectal cancer | Selection                |

|                         |                                                                                                                            |                                                                   |                                   |                  |                                                                                                                 |                  |                                                                                                                  |                                                                                                                                                                                                                                                                                                                                                                                                                                                                                                                                                                                     |           |
|-------------------------|----------------------------------------------------------------------------------------------------------------------------|-------------------------------------------------------------------|-----------------------------------|------------------|-----------------------------------------------------------------------------------------------------------------|------------------|------------------------------------------------------------------------------------------------------------------|-------------------------------------------------------------------------------------------------------------------------------------------------------------------------------------------------------------------------------------------------------------------------------------------------------------------------------------------------------------------------------------------------------------------------------------------------------------------------------------------------------------------------------------------------------------------------------------|-----------|
| Hamaker et al. 2012 [2] | 1239 of elderly care physicians registered at the National Association of Elderly Care Physicians and social Geriatricians | Nonreferral of Nursing Home Patients with Suspected Breast Cancer | Primary care setting, Netherlands | Web-based survey | All members of the National Association of Elderly Care Physicians and Socials Geriatricians in the Netherlands | Web-based survey | The extent of non-referral of patients suspected of breast cancer by ECP and the motivations behind this choice. | <p>patients. Older age groups compared to younger had higher proportion of unstaged cases. Compared with patients with low complexity of care needs, those with higher complexity were 4 to 5 times as likely to have unstaged cancer. Thirty-three percent 33% of elderly care physicians reported not referring the last patient. Motivations were end-stage dementia in 57%, patient/family preference in 29% and limited life expectancy (23%). 16% of non-referred patients had hormonal treatment started without diagnostic confirmation of cancer. Motivations to refer</p> | Volunteer |
|-------------------------|----------------------------------------------------------------------------------------------------------------------------|-------------------------------------------------------------------|-----------------------------------|------------------|-----------------------------------------------------------------------------------------------------------------|------------------|------------------------------------------------------------------------------------------------------------------|-------------------------------------------------------------------------------------------------------------------------------------------------------------------------------------------------------------------------------------------------------------------------------------------------------------------------------------------------------------------------------------------------------------------------------------------------------------------------------------------------------------------------------------------------------------------------------------|-----------|

|                               |                                                                      |                                                                                                               |                                |                       |                                                                       |                                                                   |                                                                                                                                                                                                                                                                                                                                                   |                                                                                                                                                                                                                                                                                                     |                                                                                                                                                                                                                                                                                                                                                                                                       |          |
|-------------------------------|----------------------------------------------------------------------|---------------------------------------------------------------------------------------------------------------|--------------------------------|-----------------------|-----------------------------------------------------------------------|-------------------------------------------------------------------|---------------------------------------------------------------------------------------------------------------------------------------------------------------------------------------------------------------------------------------------------------------------------------------------------------------------------------------------------|-----------------------------------------------------------------------------------------------------------------------------------------------------------------------------------------------------------------------------------------------------------------------------------------------------|-------------------------------------------------------------------------------------------------------------------------------------------------------------------------------------------------------------------------------------------------------------------------------------------------------------------------------------------------------------------------------------------------------|----------|
| Christos et al. –<br>2004 [3] | 457 nurses<br>form the Texas<br>State Board of<br>Nurse<br>Examiners | Skin cancer<br>prevention<br>and<br>detection by<br>nurses:<br>attitudes,<br>perceptions,<br>and<br>barriers. | Public<br>health,<br>Texas, US | Descriptive<br>survey | Full-time,<br>employed,<br>public<br>health and<br>oncology<br>nurses | The survey<br>instrument<br>was a 4-<br>page<br>questionnai<br>re | patients<br>were to<br>confirm the<br>diagnosis<br>(28%), fear<br>of future<br>ulceration<br>or<br>metastases<br>(21%), good<br>general<br>health and<br>life<br>expectancy<br>(19%), and<br>the desire of<br>the patient's<br>or families<br>to<br>investigate<br>(18%).<br>Eighty-four<br>percent<br>stated that it<br>was in their<br>scope of | Knowledge<br>of skin<br>cancer as a<br>public<br>health<br>problem,<br>the<br>perceived<br>importance<br>of and<br>opportunity<br>for skin<br>cancer<br>prevention<br>and<br>detection,<br>and<br>potential<br>barriers to<br>skin cancer<br>prevention<br>and<br>detection<br>services by<br>nurse | practice to<br>teach skin<br>cancer<br>prevention<br>to patients,<br>and 61%, to<br>detect skin<br>cancer in<br>patients.<br>Barriers to<br>continuing<br>education<br>for skin<br>cancer<br>prevention<br>and<br>detection<br>included<br>lack of<br>financial<br>resources<br>(43%), not<br>knowing<br>educational<br>opportuniti<br>es (41%),<br>time away<br>from work<br>(36%), and<br>time away | Sampling |
|                               |                                                                      |                                                                                                               |                                |                       |                                                                       |                                                                   | Knowledge<br>of skin<br>cancer as a<br>public<br>health<br>problem,<br>the<br>perceived<br>importance<br>of and<br>opportunity<br>for skin<br>cancer<br>prevention<br>and<br>detection,<br>and<br>potential<br>barriers to<br>skin cancer<br>prevention<br>and<br>detection<br>services by<br>nurse                                               |                                                                                                                                                                                                                                                                                                     |                                                                                                                                                                                                                                                                                                                                                                                                       |          |

|                           |                                       |                                                                                              |                               |                       |                                                                                                                                                                                                                |                                                                                        |                                                                                                                                                                    |                                                                                                                                                                                                                                                                                                                                                                                                                                                                                                                                                                   |           |
|---------------------------|---------------------------------------|----------------------------------------------------------------------------------------------|-------------------------------|-----------------------|----------------------------------------------------------------------------------------------------------------------------------------------------------------------------------------------------------------|----------------------------------------------------------------------------------------|--------------------------------------------------------------------------------------------------------------------------------------------------------------------|-------------------------------------------------------------------------------------------------------------------------------------------------------------------------------------------------------------------------------------------------------------------------------------------------------------------------------------------------------------------------------------------------------------------------------------------------------------------------------------------------------------------------------------------------------------------|-----------|
| Bradley et al. – 2008 [4] | 1907 elderly NH residents with cancer | Absence of Cancer Diagnosis and Treatment in Elderly Medicaid-Insured Nursing Home Residents | Nursing homes, Michigan, US   | Population study      | Nursing home residents diagnosed with cancer between January 1, 1997, and December 31, 2000, who have at least 1 year of claims history before the month of diagnosis to estimate patients' comorbidity burden | Dataset assembled from the Michigan Tumor Registry and Medicare records                | Cancer site for late or unstaged, cancer at diagnosis, death within 3 months of diagnosis, receipt of hospice care, and the likelihood of cancer-directed surgery. | from home (26%). Preponderance of late or unstaged disease (62%), high mortality within 3 months of diagnosis (48%), and low acute care facilities use if they were metastatic (28%). Twenty-two percent received cancer-directed surgery, 61% was for breast cancer patients. Patients who went under intervention were younger (OR = 2.83, 95%CI [1.26; 6.32]; RR = 1.37, 95%CI [1.08; 1.75]). Only 6% of patients received a systemic treatment, via chemotherapy and/or radiation. Frequent oral mucosal lesions reported were malignant tumors, leukoplakia, | Selection |
|                           |                                       |                                                                                              |                               |                       |                                                                                                                                                                                                                |                                                                                        |                                                                                                                                                                    |                                                                                                                                                                                                                                                                                                                                                                                                                                                                                                                                                                   |           |
| Yadav et al. – 2018 [5]   | 464 NH residents                      | Distribution and prevalence of oral mucosal lesions in residents of old age                  | Old age homes in Delhi, India | Cross sectional study | 65-74-year-old, in old age homes                                                                                                                                                                               | Survey was prepared based on Oral Health Assessment Form, WHO Clinical examination was | Distribution and prevalence of oral mucosal lesions                                                                                                                |                                                                                                                                                                                                                                                                                                                                                                                                                                                                                                                                                                   | Selection |

|                              |                                                                                                               |                                                                                                                                     |                                                                    |                      |                                                                                                           |                                                                                                                                                              |                                                                                                                                        |                                                                                                                                                                                                                           |           |
|------------------------------|---------------------------------------------------------------------------------------------------------------|-------------------------------------------------------------------------------------------------------------------------------------|--------------------------------------------------------------------|----------------------|-----------------------------------------------------------------------------------------------------------|--------------------------------------------------------------------------------------------------------------------------------------------------------------|----------------------------------------------------------------------------------------------------------------------------------------|---------------------------------------------------------------------------------------------------------------------------------------------------------------------------------------------------------------------------|-----------|
|                              |                                                                                                               | homes in<br>Delhi, India                                                                                                            |                                                                    |                      |                                                                                                           | performed<br>using two<br>mouth<br>mirrors<br>under<br>natural<br>illumination                                                                               |                                                                                                                                        | lichen<br>planus,<br>ulcerations,<br>ANUG,<br>abscess and<br>candidiasis.<br>Leukoplakia<br>was seen in<br>15% of<br>residents.<br>Malignant<br>tumors<br>were seen in<br>1,5% and<br>mostly on<br>the floor of<br>mouth. |           |
|                              |                                                                                                               |                                                                                                                                     |                                                                    |                      |                                                                                                           |                                                                                                                                                              | Timeliness<br>of<br>diagnosis,<br>defined as<br>diagnosis at<br>death or in<br>the same<br>month as<br>death, is a<br>care<br>outcome. | Twenty-five<br>percent<br>were<br>diagnosed<br>at death or<br>during the<br>month they<br>died.                                                                                                                           |           |
| Clement et al. –<br>2009 [6] | 1316 NH<br>residents<br>without a<br>cancer<br>diagnosis but<br>developed the<br>disease during<br>their stay | Organizational<br>characteristics<br>and<br>cancer care<br>for nursing<br>home<br>residents                                         | Nursing<br>homes,<br>Michigan,<br>US                               | Cohort<br>study      | Subsequently<br>diagnosed<br>with cancer<br>from 1997 to<br>2000,<br>Residents<br>for at least<br>31 days | Data from<br>the<br>Michigan<br>Tumor<br>Registry<br>(1997–2000),<br>Medicare<br>claims,<br>Medicaid<br>cost reports,<br>and the<br>Area<br>Resource<br>File | Pain<br>medication<br>administration<br>during<br>the month<br>of diagnosis<br>or the<br>month<br>following<br>diagnosis.              | Seventy-<br>four percent<br>of diagnosis<br>were made<br>at late or<br>unstaged<br>cancer. Risk<br>factors were<br>oldest and<br>Alzheimer<br>disease.                                                                    | Selection |
| Rudel et al. –<br>2007 [7]   | 39 directors of<br>nursing for<br>rural long-term<br>care facilities                                          | On breast<br>cancer<br>detection,<br>directors of<br>nursing and<br>female<br>residents: a<br>study in<br>rural long-<br>term care. | Rural long-<br>term care<br>facilities,<br>Midwestern<br>state, US | Descriptive<br>study | Long term<br>care<br>facilities<br>situated in<br>communities<br>with a<br>population<br>of under<br>2500 | Survey with<br>fixed-<br>choices,<br>Likert-<br>scales, and<br>qualitative<br>open-ended<br>questions                                                        | Clinical<br>breast exam<br>frequency,<br>mammogra-<br>phy<br>frequency,<br>factors<br>influencing<br>screening<br>services             | LTC<br>facilities<br>reported<br>that over<br>75% of the<br>elderly<br>women do<br>receive<br>regular<br>CBEs by a<br>provider,<br>43.6%<br>respondents<br>reported<br>that less                                          | Selection |

|                            |                   |                                                                                    |                        |                          |                                                                        |                                                                                                                                                                                                      |                          |                                                                                                                                                                                                                                                                                                                                                                                                                                                                                                                              |  |
|----------------------------|-------------------|------------------------------------------------------------------------------------|------------------------|--------------------------|------------------------------------------------------------------------|------------------------------------------------------------------------------------------------------------------------------------------------------------------------------------------------------|--------------------------|------------------------------------------------------------------------------------------------------------------------------------------------------------------------------------------------------------------------------------------------------------------------------------------------------------------------------------------------------------------------------------------------------------------------------------------------------------------------------------------------------------------------------|--|
|                            |                   |                                                                                    |                        |                          |                                                                        |                                                                                                                                                                                                      |                          | than 25% receive a CBE. The perceived barriers to screening were facility physician(s) do not encourage mammograms; and some believe that mammograms are too expensive to be efficacious in LTC. They reported that embarrassment for elderly women residents and time for CBE and mammography would not be an issue. In 9 residents, a cancer event was recorded during follow-up: 5 new (suspected or diagnosed) cancer events (incidence rate = 123/100.000 NHR per year) and 4 with (suspected or diagnosed) progressive |  |
| Wildiers et al. – 2019 [8] | 4262 NH residents | Cancer events in Belgian nursing home residents: An EORTC prospective cohort study | Nursing homes, Belgium | Prospective cohort study | Being a resident in one of the 39 nursing home during the study period | Data from a questionnaire completed by the dedicated nurse and the treating general practitioner in the nursing home. Medical documents from hospitalization/specialist consultation were also used. | Incidence rate of cancer | Reporting                                                                                                                                                                                                                                                                                                                                                                                                                                                                                                                    |  |

|                           |                            |                                                                                  |                            |                       |                                                                   |                                                                                                                          |                                      |                                                                                                                                                                                                                                                                                                                                                                                        |           |
|---------------------------|----------------------------|----------------------------------------------------------------------------------|----------------------------|-----------------------|-------------------------------------------------------------------|--------------------------------------------------------------------------------------------------------------------------|--------------------------------------|----------------------------------------------------------------------------------------------------------------------------------------------------------------------------------------------------------------------------------------------------------------------------------------------------------------------------------------------------------------------------------------|-----------|
| Darjani et al. – 2020 [9] | 259 nursing home residents | Skin Diseases among the Old Age Residents in a Nursing Home: A Neglected Problem | Charity nursing home, Iran | Cross-sectional study | All residents more than 60 years form November 2017 to March 2018 | Full-body skin examination by dermatologists, confirmation of the disease by biopsy, pathological and laboratory methods | Frequency of dermatological diseases | disease. No diagnostic procedure was performed in 4 residents suspected with cancer, and in 5 no anticancer treatment was started. Almost 86% had age-related skin changes. The benign neoplasm was the most common skin disease among patients (68.3%), followed by infectious diseases (46.3%) and erythema-squamous (31.6%). None of them had precancerous lesions or skin cancers. | Selection |
|---------------------------|----------------------------|----------------------------------------------------------------------------------|----------------------------|-----------------------|-------------------------------------------------------------------|--------------------------------------------------------------------------------------------------------------------------|--------------------------------------|----------------------------------------------------------------------------------------------------------------------------------------------------------------------------------------------------------------------------------------------------------------------------------------------------------------------------------------------------------------------------------------|-----------|

Table S5. Characteristics of studies, treatment.

| Authors - Year           | Population                                        | Object                                                                                  | Setting                                    | Design                                    | Inclusion Criteria                                                                     | Intervention                                                                                           | Main Outcome Measures                                                                        | Results                                                                                                      | Principal Source of Bias |
|--------------------------|---------------------------------------------------|-----------------------------------------------------------------------------------------|--------------------------------------------|-------------------------------------------|----------------------------------------------------------------------------------------|--------------------------------------------------------------------------------------------------------|----------------------------------------------------------------------------------------------|--------------------------------------------------------------------------------------------------------------|--------------------------|
| Hyman et al. – 2005 [10] | 6487 women with lymph node-positive breast cancer | Adjuvant Chemotherapy in Older and Younger Women with Lymph Node-Positive Breast Cancer | Academic and community medical centers, US | Retrospective review of randomized trials | From 4 CALGB randomized trials, designed for patients with node-positive breast cancer | Comparison of at least 2 chemotherapy regimens that differed by dose level, dose intensity, or regimen | Comparison of disease-free survival, overall survival, and treatment-related mortality among | Increased odds of death from treatment toxicity (33 deaths, 0.5% of all patients). Adjuvant chemotherapy and | Selection                |



|                        |                              |                                                                                                                       |                          |                                 |                                                                                                                                               |                                                                                              |                                                                                                                                                                                                                                                                                                                                                                                                                                                                                                                                                                                                         |           |
|------------------------|------------------------------|-----------------------------------------------------------------------------------------------------------------------|--------------------------|---------------------------------|-----------------------------------------------------------------------------------------------------------------------------------------------|----------------------------------------------------------------------------------------------|---------------------------------------------------------------------------------------------------------------------------------------------------------------------------------------------------------------------------------------------------------------------------------------------------------------------------------------------------------------------------------------------------------------------------------------------------------------------------------------------------------------------------------------------------------------------------------------------------------|-----------|
|                        |                              |                                                                                                                       |                          |                                 |                                                                                                                                               | different age groups                                                                         | tamoxifen improved significantly disease-free and overall survival in older women with node-positive disease. No association between age, disease-free survival and reduction in breast cancer mortality. Death from causes other than breast cancer deteriorates overall survival ( $P < .001$ ) for patients aged 65 or older. Most common tumoral sites were skin, digestive tract and breast. The residents were moderately dependent based on the AGGIR scale in 50% of cases and highly dependent in 43%. Staging information was available in 61%, and reports of a multidisciplinary discussion |           |
| Liu et al. – 2019 [11] | 214 NH residents with cancer | Prevalence of cancer and management in elderly nursing home residents. A descriptive study in 45 French nursing homes | 45 nursing homes, France | Descriptive retrospective study | All residents with cancer or recurrence of cancer occurring after the age of 75 years regardless of tumoral site and oncologic treatment plan | Data from the medical records of NH, local hospital and loco-regional online cancer registry | Cancer prevalence occurring after the age of 75, residents' characteristics and parameters associated with cancer specific management                                                                                                                                                                                                                                                                                                                                                                                                                                                                   | Volunteer |



|                           |                                                                       |                                                                                                              |                                      |                 |                                                                                                                                                                                                                                                                                                                                         |                                                                                                                                             |                                    |                                                                                                                                                                                                                                                                                                                                                                                                                                                                                                                                                                                                                                                                                                                                                                |             |
|---------------------------|-----------------------------------------------------------------------|--------------------------------------------------------------------------------------------------------------|--------------------------------------|-----------------|-----------------------------------------------------------------------------------------------------------------------------------------------------------------------------------------------------------------------------------------------------------------------------------------------------------------------------------------|---------------------------------------------------------------------------------------------------------------------------------------------|------------------------------------|----------------------------------------------------------------------------------------------------------------------------------------------------------------------------------------------------------------------------------------------------------------------------------------------------------------------------------------------------------------------------------------------------------------------------------------------------------------------------------------------------------------------------------------------------------------------------------------------------------------------------------------------------------------------------------------------------------------------------------------------------------------|-------------|
| Tang et al.-<br>2018 [13] | 5969 NH<br>residents<br>who<br>underwent<br>breast cancer<br>surgery. | Functional<br>Status and<br>Survival<br>After Breast<br>Cancer<br>Surgery in<br>Nursing<br>Home<br>Residents | All Medicare<br>nursing<br>homes, US | Cohort<br>study | Female long-<br>term nursing<br>home<br>residents<br>(age ≥67<br>years) who<br>underwent<br>an inpatient<br>breast cancer<br>surgical<br>procedure<br>by linking<br>data from<br>100%<br>national<br>Medicare<br>inpatient<br>files (2003-<br>2013) with<br>the<br>Minimum<br>Data Set<br>(MDS) for<br>nursing<br>homes<br>(2003-2013). | Medicare<br>claims from<br>2003 to 2013,<br>use of<br>Minimum<br>Data Set<br>Activities of<br>Daily Living<br>(MDS-ADL)<br>summary<br>score | Functional<br>status and<br>death. | Of 5969<br>female NH<br>residents<br>who<br>underwent<br>surgery<br>(mean [SD]<br>age, 82 [7]<br>years) 666<br>(11.2%)<br>underwent<br>lumpectomy<br>, 1642<br>(27.5%)<br>underwent<br>mastectomy,<br>and 3661<br>(61.3%)<br>underwent<br>lumpectomy<br>or<br>mastectomy<br>with axillary<br>lymph node<br>dissection<br>(ALND). The<br>30-day<br>mortality<br>rates were<br>8% after<br>lumpectomy<br>, 4% after<br>mastectomy,<br>and 2% after<br>ALND. The<br>1-year<br>mortality<br>rates were<br>41% after<br>lumpectomy<br>, 30% after<br>mastectomy,<br>and 29%<br>after ALND.<br>Among 1-<br>year<br>survivors,<br>the<br>functional<br>decline rate<br>was 56% to<br>60%. The<br>mean MDS-<br>ADL score<br>increased by<br>3 points for<br>lumpectomy | Information |
|---------------------------|-----------------------------------------------------------------------|--------------------------------------------------------------------------------------------------------------|--------------------------------------|-----------------|-----------------------------------------------------------------------------------------------------------------------------------------------------------------------------------------------------------------------------------------------------------------------------------------------------------------------------------------|---------------------------------------------------------------------------------------------------------------------------------------------|------------------------------------|----------------------------------------------------------------------------------------------------------------------------------------------------------------------------------------------------------------------------------------------------------------------------------------------------------------------------------------------------------------------------------------------------------------------------------------------------------------------------------------------------------------------------------------------------------------------------------------------------------------------------------------------------------------------------------------------------------------------------------------------------------------|-------------|

, 4 points for mastectomy, and 5 points for ALND.

In multivariate analysis, poor baseline MDS-ADL score was associated with a higher 1-year mortality risk

(lumpectomy: HR, 1.92, 95%CI [1.23;3.00],  $P = .004$ ;

mastectomy: HR, 1.80, 95%CI

[1.35;2.39],  $P < .001$ ; and ALND: HR, 1.77, 95%CI [1.46;2.15],  $P < .001$ ). After

multivariate adjustment, preoperative decline in MDS-ADL score

(lumpectomy: sHR, 1.59, 95%CI [1.25;2.03],  $P < .001$ ;

mastectomy: sHR, 1.79, 95%CI

[1.52;2.09],  $P < .001$ ; and ALND: sHR, 1.72, 95%CI [1.56;1.91],  $P < .001$ ) and

cognitive impairment (lumpectomy: sHR, 1.27, 95%CI [1.03;1.56],  $P$



|                             |                                                           |                                                                                                   |                                   |                                   |                                                                                                                                                                                                                                                                                            |                                                                                                                       |                                                                                                                                                                                                                                                                                                                                                                                                                                                                                                                                                                                             |           |
|-----------------------------|-----------------------------------------------------------|---------------------------------------------------------------------------------------------------|-----------------------------------|-----------------------------------|--------------------------------------------------------------------------------------------------------------------------------------------------------------------------------------------------------------------------------------------------------------------------------------------|-----------------------------------------------------------------------------------------------------------------------|---------------------------------------------------------------------------------------------------------------------------------------------------------------------------------------------------------------------------------------------------------------------------------------------------------------------------------------------------------------------------------------------------------------------------------------------------------------------------------------------------------------------------------------------------------------------------------------------|-----------|
|                             |                                                           |                                                                                                   |                                   |                                   |                                                                                                                                                                                                                                                                                            | and<br>comorbidity.                                                                                                   | [1.11;1.32], $P < .001$ ).<br>Operative mortality was 18% after proctectomy with permanent colostomy and 13% after sphincter-sparing proctectomy (adjusted relative risk, 1.25, 95%CI [0.90;1.73], $p = 0.188$ ) and one-year mortality was also high with respectively 51% and 40% (adjusted hazard ratio 1.32, 95%CI [1.09;1.60], $p = 0.004$ ).<br>After sphincter-sparing proctectomy, 37% of residents were incontinent of feces. Surgery with curative intent (77.2%), elective setting (57.9%) and open approach (78.9%). Postoperative complications happened in 36.8% of patients, |           |
| Finlayson et al.- 2012 [15] | 979 NH residents undergoing proctectomy for rectal cancer | Outcomes After Rectal Cancer Surgery in Elderly Nursing Home Residents                            | Nursing homes, US                 | Retrospective cohort study        | Long-term nursing home residents underwent 2 or more consecutive MDS assessments performed over 90 days apart during the 6 months before surgery, undergoing oncologic resection for rectal cancer with proctectomy with permanent colostomy and sphincter-sparing proctectomy (2000–2005) | Data from national Medicare Inpatient Files (2000–2005) with the Minimum Data Set for Nursing Homes (MDS, 1999–2006). | Fecal incontinence and the 1-year mortality rate                                                                                                                                                                                                                                                                                                                                                                                                                                                                                                                                            | Selection |
| Chan et al.- 2019 [16]      | 57 patients aged 90 or above                              | Outcomes of colorectal cancer surgery in the nonagenarians: 20-year result from a tertiary center | Tertiary center, Hong Kong, China | Retrospective observational study | Patients aged 90 or above, underwent operations all patients who suffered from histologically proven adenocarcinoma of the colon and rectum and underwent                                                                                                                                  | Review of medical records                                                                                             | Complications rate, 30-day and 180-day mortality rates                                                                                                                                                                                                                                                                                                                                                                                                                                                                                                                                      | Selection |

|                           |                                       |                                                                                              |                             |                    |                                                                                                                                                                                                                |                                                                         |                                                                                                                                                                    |                                                                                                                                                                                                                                                                                                                                                                                                                                                                                                                                                                                                             |           |
|---------------------------|---------------------------------------|----------------------------------------------------------------------------------------------|-----------------------------|--------------------|----------------------------------------------------------------------------------------------------------------------------------------------------------------------------------------------------------------|-------------------------------------------------------------------------|--------------------------------------------------------------------------------------------------------------------------------------------------------------------|-------------------------------------------------------------------------------------------------------------------------------------------------------------------------------------------------------------------------------------------------------------------------------------------------------------------------------------------------------------------------------------------------------------------------------------------------------------------------------------------------------------------------------------------------------------------------------------------------------------|-----------|
| Bradley et al. – 2008 [4] | 1907 elderly NH residents with cancer | Absence of Cancer Diagnosis and Treatment in Elderly Medicaid-Insured Nursing Home Residents | Nursing homes, Michigan, US | Populational study | Nursing home residents diagnosed with cancer between January 1, 1997, and December 31, 2000, who have at least 1 year of claims history before the month of diagnosis to estimate patients' comorbidity burden | Dataset assembled from the Michigan Tumor Registry and Medicare records | Cancer site for late or unstaged, cancer at diagnosis, death within 3 months of diagnosis, receipt of hospice care, and the likelihood of cancer-directed surgery. | postoperative pneumonia was the most common. The 30-day and 180-day mortality rate was 7 and 31.6% respectively. The 1 and 2-year survival rate for elective surgery was 69.7 and 54.5% respectively. Preponderance of late or unstaged disease (62%), high mortality within 3 months of diagnosis (48%), and low hospice use if they had distant-stage cancer (28%). Only 22% received cancer-directed surgery, 61% of which was breast cancer patients, and 6% received chemotherapy and/or radiation. Older age was positively associated with late or unstaged cancer and with death within 3 months of | Selection |
|---------------------------|---------------------------------------|----------------------------------------------------------------------------------------------|-----------------------------|--------------------|----------------------------------------------------------------------------------------------------------------------------------------------------------------------------------------------------------------|-------------------------------------------------------------------------|--------------------------------------------------------------------------------------------------------------------------------------------------------------------|-------------------------------------------------------------------------------------------------------------------------------------------------------------------------------------------------------------------------------------------------------------------------------------------------------------------------------------------------------------------------------------------------------------------------------------------------------------------------------------------------------------------------------------------------------------------------------------------------------------|-----------|

|                             |                                 |                                                                                                                          |                                    |                   |                                                                                                                                                                                                                                                                            |                                     |                                                                                                                                                                                       |                                                                                                                                                                                                                                                                                                                                                                                                                                                                                                                                                           |             |
|-----------------------------|---------------------------------|--------------------------------------------------------------------------------------------------------------------------|------------------------------------|-------------------|----------------------------------------------------------------------------------------------------------------------------------------------------------------------------------------------------------------------------------------------------------------------------|-------------------------------------|---------------------------------------------------------------------------------------------------------------------------------------------------------------------------------------|-----------------------------------------------------------------------------------------------------------------------------------------------------------------------------------------------------------------------------------------------------------------------------------------------------------------------------------------------------------------------------------------------------------------------------------------------------------------------------------------------------------------------------------------------------------|-------------|
| Williams et al. – 2018 [17] | 125 older adults                | Geriatric assessment to predict hospitalization frequency and long-term care utilization in older adult cancer survivors | North Carolina Cancer Hospital, US | Cohort study      | Age 65 years and over, a cancer diagnosis, completed the GA from 3 months pre-diagnosis through 6 months postdiagnosis, have continuous enrollment in both Medicare Parts A and B, with no enrollment in managed care plans for 6 months before and after cancer diagnosis | Data collected from Medicare claims | Hospitalizations and long-term care utilization, geriatric assessment risk measures (frail status, impaired IADL, limitations in climbing stairs, falls, TUG, unintended weight lost) | diagnosis. Patients aged 71 – 75 years were more likely to have cancer-directed surgery than patients aged 86 years and older (OR = 2.83, 95%CI [1.26;6.32]; RR = 1.37, 95%CI [1.08;1.75]. Compared to their counterparts living at home, factors associated with long term care use were prefrail/frail status (RR, 1.86; P, .007), instrumental activities of daily living impairment (RR, 4.58; P, .001), history of falls (RR, 6.73; P, .001), prolonged Timed Up and Go (RR, 5.45; P, .001), and limitations in climbing stairs (RR, 1.89; P, .005). | Sample      |
|                             |                                 |                                                                                                                          |                                    |                   |                                                                                                                                                                                                                                                                            |                                     |                                                                                                                                                                                       |                                                                                                                                                                                                                                                                                                                                                                                                                                                                                                                                                           |             |
| Buchanan et al. – 2005 [18] | 548 330 patients admitted in NH | Analyses of Nursing Home Residents with Cancer                                                                           | Nursing home, US                   | Descriptive study | Nursing home admission assessments recorded in the national                                                                                                                                                                                                                | Data from MDS                       | Sociodemographic characteristics, measure of health status, levels                                                                                                                    | 11% of all admissions was diagnosed cancer. Majority was                                                                                                                                                                                                                                                                                                                                                                                                                                                                                                  | Information |



|                          | at Admission                                          |                                                                                                           |                                                                                  | Minimum Data Set (MDS) during 2002 |                                                           | of physical dependency, cognitive performance, and treatments or therapies received. | dependent for activities of daily living and more than a half used a wheelchair. More than 37% experienced at least moderate daily pain at admission and require heavy care; 26% had a diagnosis of depression. More than 50% of residents with cancer had an unstable health condition, 21% had a life expectancy of less than six months, and 19% received hospice care. More than 40% of residents with cancer had no advance directives recorded at admission |                                                                                                                                 |             |
|--------------------------|-------------------------------------------------------|-----------------------------------------------------------------------------------------------------------|----------------------------------------------------------------------------------|------------------------------------|-----------------------------------------------------------|--------------------------------------------------------------------------------------|-------------------------------------------------------------------------------------------------------------------------------------------------------------------------------------------------------------------------------------------------------------------------------------------------------------------------------------------------------------------------------------------------------------------------------------------------------------------|---------------------------------------------------------------------------------------------------------------------------------|-------------|
| Blytt et al. – 2018 [19] | 1825 NH patients with and without dementia and cancer | Comorbid Dementia and Cancer in Residents of Nursing Homes: Secondary Analyses of a Cross-Sectional Study | 64 nursing homes, located in urban and rural areas in 5 of 19 counties of Norway | Cross-sectional study              | All patients who had lived in the NH for at least 2 weeks | Medical record, standardized interviews with the patient's primary caregiver         | Prevalence of cancer among NH patients with and without dementia and compare patients with comorbid dementia and cancer with those without, the                                                                                                                                                                                                                                                                                                                   | 84 % had dementia, and 5.5% had comorbid dementia and cancer. Patients with comorbid dementia and cancer received significantly | Information |

|                             |                                                   |                                                                                                                                        |                                                                 |                                   |                                                                                                                                            |                                |                                                                                                              |                                                                                                                                                                             |                                                                                                                                                                                                                                                                                                                                                                                                                                                                                |  |
|-----------------------------|---------------------------------------------------|----------------------------------------------------------------------------------------------------------------------------------------|-----------------------------------------------------------------|-----------------------------------|--------------------------------------------------------------------------------------------------------------------------------------------|--------------------------------|--------------------------------------------------------------------------------------------------------------|-----------------------------------------------------------------------------------------------------------------------------------------------------------------------------|--------------------------------------------------------------------------------------------------------------------------------------------------------------------------------------------------------------------------------------------------------------------------------------------------------------------------------------------------------------------------------------------------------------------------------------------------------------------------------|--|
|                             |                                                   |                                                                                                                                        |                                                                 |                                   |                                                                                                                                            |                                |                                                                                                              | prevalence of neuropsychiatric symptoms (NPS) such as agitation, depression, and sleep disturbances and the daily use of medication, including analgesic drug prescription. | more analgesics compared with patients without cancer but with dementia. Compared with patients without dementia but with cancer, patients with comorbid dementia and cancer had significantly more NPS, including sleep disturbances and agitation. Residents with cancer reported more bodily pain (P = .17). General health was worse than that of the residents without cancer (P = .04) after adjusting for sociodemographic variables but not for comorbidity (P = .06). |  |
| Drageset et al. – 2012 [20] | Cognitively intact NH residents 65 years or older | Cancer in nursing homes: characteristics and health-related quality of life among cognitively intact residents with and without cancer | 2042 long-term-care residents from the 30 NHs in Bergen, Norway | Cross-sectional observation study | All cognitively intact NH residents 65 years or older who were capable of conversing and had been residing in the NH for at least 6 months | Single face-to-face interviews | Differences in HRQOL, controlled for age, gender, marital status, education, length of stay, and comorbidity | Information                                                                                                                                                                 |                                                                                                                                                                                                                                                                                                                                                                                                                                                                                |  |

Table S6. Characteristics of studies, symptoms.

| Authors – Year           | Population                        | Object                                    | Setting                  | Design                | Inclusion Criteria                          | Intervention                            | Main Outcome Measures               | Results                                   | Principal Source of Bias |
|--------------------------|-----------------------------------|-------------------------------------------|--------------------------|-----------------------|---------------------------------------------|-----------------------------------------|-------------------------------------|-------------------------------------------|--------------------------|
| Blytt et al. – 2018 [19] | 1825 NH patients with and without | Comorbid Dementia and Cancer in Residents | 64 nursing homes, Norway | Cross-sectional study | All patients who had lived in the NH for at | Medical record, standardized interviews | Prevalence and comparison of cancer | Cancer is a risk factor of receiving more | Selection                |

|                                     |                     |                                                                                              |                                          |                    |                                        |                                                                                                                                             |                                                                                   |                                                                                                                                                                                                                                                                                                                                                                                                                                                                                                                                                 |  |
|-------------------------------------|---------------------|----------------------------------------------------------------------------------------------|------------------------------------------|--------------------|----------------------------------------|---------------------------------------------------------------------------------------------------------------------------------------------|-----------------------------------------------------------------------------------|-------------------------------------------------------------------------------------------------------------------------------------------------------------------------------------------------------------------------------------------------------------------------------------------------------------------------------------------------------------------------------------------------------------------------------------------------------------------------------------------------------------------------------------------------|--|
|                                     | dementia and cancer | of Nursing Homes: Secondary Analyses of a Cross-Sectional Study                              |                                          |                    | least 2 weeks                          | with the patient's primary caregiver                                                                                                        | among patients with and without dementia. Prevalence of neuropsychiatric symptoms | analgesics in patients with dementia. Patients with comorbid dementia and cancer had significantly more neuropsychiatric symptoms, suggesting inadequate relief. Use of analgesic medication was different depending on the diagnosis: cancer (odds ratio [OR] = 3.9, P = 0.048), heart/coronary disease (and OR = 3.49; P = 0.023) or suffering from dyspnea (OR = 3.2; P = 0.074). The main reason to give opioids was pain (22%) or a combination of different reasons (22%). Opioids were used as a prophylaxis (18%) or for comfort (13%). |  |
| Wergeland Sørbye et al. – 2019 [21] | 100 NH residents    | Opioids, Pain Management, and Palliative Care in a Norwegian Nursing Home From 2013 to 2018. | Non-profit nursing homes in Oslo, Norway | Longitudinal study | Residents who died in the nursing home | Data from InterRAI assessment instrument annually and when the resident died; semi-structured interview with nurses on duty at the deathbed | Description of the use of opioids                                                 | Volunteer                                                                                                                                                                                                                                                                                                                                                                                                                                                                                                                                       |  |

|                                |                                              |                                                                                                                                                                                                        |                                           |                                                 |                                                                                                                                                                                  |                                                                                                                    |                                                                                                                                                                                                                                                                                                  |                                                                                                                                                                                                                                                                                                                                                                                       |             |
|--------------------------------|----------------------------------------------|--------------------------------------------------------------------------------------------------------------------------------------------------------------------------------------------------------|-------------------------------------------|-------------------------------------------------|----------------------------------------------------------------------------------------------------------------------------------------------------------------------------------|--------------------------------------------------------------------------------------------------------------------|--------------------------------------------------------------------------------------------------------------------------------------------------------------------------------------------------------------------------------------------------------------------------------------------------|---------------------------------------------------------------------------------------------------------------------------------------------------------------------------------------------------------------------------------------------------------------------------------------------------------------------------------------------------------------------------------------|-------------|
| Drageset et al.<br>– 2015 [22] | 60 NH<br>residents with<br>cancer            | Loneliness,<br>loss, and<br>social<br>support<br>among<br>cognitively<br>intact older<br>people with<br>cancer,<br>living in<br>nursing<br>homes—a<br>mixed-<br>methods<br>study                       | Nursing<br>homes,<br>Norway               | Mixed-<br>methods<br>design,<br>cohort<br>study | Diagnosis of<br>cancer, 65<br>years and<br>older,<br>cognitively<br>intact,<br>capable of<br>conversing<br>and<br>residing in<br>the nursing<br>home for at<br>least 6<br>months | Face-to-face<br>interviews<br>using the<br>one-item<br>loneliness<br>scale and<br>the social<br>provision<br>scale | Loneliness<br>and social<br>support and<br>patient's<br>experience<br>with<br>loneliness,<br>social<br>support,<br>and loss.                                                                                                                                                                     | Marital<br>status<br>( $P=0.02$ ) and<br>the<br>subdimensi<br>on<br>reassurance<br>of worth<br>( $P=0.001$ )<br>were<br>significantly<br>associated<br>with<br>loneliness. This<br>emotional<br>state was<br>alleviated<br>by being<br>engaged in<br>activities,<br>being in<br>contact with<br>other<br>people, and<br>occupying<br>oneself.<br>Overall<br>survival<br>after 5 years | Sampling    |
| Drageset et al.<br>– 2013 [23] | 227 cognitively<br>intact older<br>residents | Emotional<br>Loneliness<br>Is<br>Associated<br>with<br>Mortality<br>Among<br>Mentally<br>Intact<br>Nursing<br>Home<br>Residents<br>with and<br>Without<br>Cancer: A<br>Five-Year<br>Follow-Up<br>Study | 30 nursing<br>homes,<br>Bergen,<br>Norway | Cross-<br>sectional<br>design                   | Patients<br>who scored<br>0,5 or less<br>on the<br>Clinical<br>Dementia<br>Rating<br>Scale, and<br>provided<br>informed<br>consent                                               | Face-to-face<br>interview<br>and<br>sociodemog<br>raphic<br>variables<br>and medical<br>records                    | Sociodemog<br>raphic<br>factors and<br>illness<br>variables<br>association<br>with<br>mortality<br>and<br>emotional<br>and social<br>loneliness<br>measured<br>using the<br>Social<br>Provisions<br>Scale<br>influence on<br>mortality<br>among<br>nursing<br>homes<br>residents<br>with cancer. | Depression<br>and<br>comorbidity<br>were<br>associated<br>with<br>significantly<br>worse<br>survival<br>independen<br>t of a cancer<br>diagnosis.<br>Residents<br>with cancer<br>and<br>symptoms<br>of anxiety<br>had worse<br>survival<br>than those                                                                                                                                 | Information |

|                             |                                  |                                                                                           |                                   |                               |                                                                       |                                                                                                                                                                            |                                                                                                                                                                     |                                                                                                                                                                                                                                                                                                               |             |
|-----------------------------|----------------------------------|-------------------------------------------------------------------------------------------|-----------------------------------|-------------------------------|-----------------------------------------------------------------------|----------------------------------------------------------------------------------------------------------------------------------------------------------------------------|---------------------------------------------------------------------------------------------------------------------------------------------------------------------|---------------------------------------------------------------------------------------------------------------------------------------------------------------------------------------------------------------------------------------------------------------------------------------------------------------|-------------|
| Monroe et al. – 2012 [24]   | 58 NH patients                   | Assessing Advanced Cancer Pain in Older Adults with Dementia at the End-Of-Life           | Nursing homes, US                 | Cross sectional study         | Nursing home residents with mild to very severe dementia              | Retrospective chart audits of people with Alzheimer's disease in nine nursing homes in 2009.                                                                               | Discomfort Behavior Scale score and the Cognitive Performance Scale score                                                                                           | without anxiety symptoms (P = .02), but not found among the noncancer group. Patients with severe cognitive dysfunction have less pain behaviors. Medications administered over the 2 weeks before death were not correlated with pain behavior. Patients with severe Alzheimer disease received less opioid. | Information |
|                             |                                  |                                                                                           |                                   |                               |                                                                       |                                                                                                                                                                            |                                                                                                                                                                     |                                                                                                                                                                                                                                                                                                               |             |
| Godino C et al. – 2006 [25] | 40 oncology patients             | Nursing education as an intervention to decrease fatigue perception in oncology patients. | Cancer center in Barcelona, Spain | Randomized experimental study | Patients with colon or gastric cancer                                 | Patient education program delivered by nurses multifaceted; including one-to-one education, training and counselling, audio-visual and computerized educational materials. | Functional Assessment of Cancer Therapy Fatigue scores (FACT-F); satisfaction with the nursing intervention on fatigue assessed with a self-completed questionnaire | Decrease in the level of fatigue in the experimental group, whereas the group of patients that did not receive this intervention showed an increase in fatigue level along the treatment.                                                                                                                     | Information |
|                             |                                  |                                                                                           |                                   |                               |                                                                       |                                                                                                                                                                            |                                                                                                                                                                     |                                                                                                                                                                                                                                                                                                               |             |
| Berry et al. – 2007 [26]    | 9 family members of NH residents | The Pain of Residents with Terminal Cancer in USA Nursing Homes:                          | Nursing homes in south-central US | Cohort study                  | Family members of nursing home residents who had end-stage cancer and | Unstructured interviews, demographic information, an assessment                                                                                                            | Perspectives of family members of nursing home residents with terminal                                                                                              | Vision of the patient's pain and illness was different if family member believed the                                                                                                                                                                                                                          | Selection   |

|                             |                                |                                                       |                   |                        |                                                            |                                                                                                                     |                                                                                                  |                                                                                                                                                                                                                                                                                                                                                                             |             |
|-----------------------------|--------------------------------|-------------------------------------------------------|-------------------|------------------------|------------------------------------------------------------|---------------------------------------------------------------------------------------------------------------------|--------------------------------------------------------------------------------------------------|-----------------------------------------------------------------------------------------------------------------------------------------------------------------------------------------------------------------------------------------------------------------------------------------------------------------------------------------------------------------------------|-------------|
|                             |                                | Family Members' Perspectives                          |                   |                        | had reported pain.                                         | of the status of the resident's pain management.                                                                    | cancer, about pain and pain management.                                                          | pain could be better managed or not. Members who believed pain could possibly be better managed often took the role of advocate and follow the evolution, while those who thought no improvement was possible expressed no concerns about this aspect of care as it was part of the illness and represented a barrier to the resident's access to adequate pain management. |             |
| Pimentel et al. – 2015 [27] | 8,094 NH residents with cancer | Pain Management in Nursing Home Residents with Cancer | Nursing homes, US | Cross-sectional study. | Newly admitted, Medicare-eligible NH residents with cancer | Nationwide data on NH resident health from the Minimum Data Set 2.0 linked to all-payer pharmacy dispensing records | Identification of all drugs dispensed within seven days of a resident's first prescription date. | 65% of residents with cancer had any pain, among whom 13.5% had severe and 61.3% had moderate pain. 17% of residents in daily pain (CI [16.0;19.1%]) received                                                                                                                                                                                                               | Information |

|                            |                                        |                                                                                             |                      |                              |                                                                                                                                                                                               |                                                    |                                                                                                                                                                                                                                  |                                                                                                                                                                                                                                                                                                                                                                                                                                                                                                                                                                                                                                                                                                                           |             |
|----------------------------|----------------------------------------|---------------------------------------------------------------------------------------------|----------------------|------------------------------|-----------------------------------------------------------------------------------------------------------------------------------------------------------------------------------------------|----------------------------------------------------|----------------------------------------------------------------------------------------------------------------------------------------------------------------------------------------------------------------------------------|---------------------------------------------------------------------------------------------------------------------------------------------------------------------------------------------------------------------------------------------------------------------------------------------------------------------------------------------------------------------------------------------------------------------------------------------------------------------------------------------------------------------------------------------------------------------------------------------------------------------------------------------------------------------------------------------------------------------------|-------------|
| Dube et al. –<br>2018 [28] | 367 462 NH<br>residents with<br>cancer | Cognitive<br>Impairment<br>and Pain<br>Among<br>Nursing<br>Home<br>Residents<br>with Cancer | Nursing<br>homes, US | Cross-<br>sectional<br>study | All newly<br>admitted<br>nursing<br>home<br>residents<br>who were<br>age 50 years<br>and older<br>with an<br>active<br>cancer<br>diagnosis<br>on their<br>admission<br>MDS in<br>2011 or 2012 | Minimum<br>Data Set 3.0<br>admission<br>assessment | Pain<br>(frequency,<br>effect on<br>function,<br>intensity of<br>pain) and<br>pain<br>managemen<br>t (any<br>scheduled<br>and as-<br>needed pain<br>medication,<br>and any<br>nonpharma<br>cologic<br>intervention<br>for pain.) | no<br>analgesics,<br>including<br>11.7% with<br>severe pain<br>(95%CI<br>[8.9;14.5%])<br>and 16.9%<br>with<br>moderate<br>pain (95%CI<br>[15.1;18.8%]<br>). Treatment<br>was<br>negatively<br>associated<br>with age<br>>85 years,<br>cognitive<br>impairment,<br>presence of<br>feeding<br>tube, and<br>restraints.<br>Documentat<br>ion of pain<br>less<br>frequent<br>when<br>severe<br>cognitive<br>impairment<br>(severe<br>versus<br>no/mild<br>cognitive<br>impairment;<br>self-<br>assessed<br>pain 0.77,<br>95%CI<br>[0.76;0.78];<br>staff-<br>assessed<br>pain 0.96,<br>95%CI<br>[0.93;0.99]).<br>Pharmacolo<br>gic<br>managemen<br>t in 59.4%<br>compared<br>to 74.9% in<br>those with<br>no/mild<br>cognitive | Information |
|----------------------------|----------------------------------------|---------------------------------------------------------------------------------------------|----------------------|------------------------------|-----------------------------------------------------------------------------------------------------------------------------------------------------------------------------------------------|----------------------------------------------------|----------------------------------------------------------------------------------------------------------------------------------------------------------------------------------------------------------------------------------|---------------------------------------------------------------------------------------------------------------------------------------------------------------------------------------------------------------------------------------------------------------------------------------------------------------------------------------------------------------------------------------------------------------------------------------------------------------------------------------------------------------------------------------------------------------------------------------------------------------------------------------------------------------------------------------------------------------------------|-------------|





|                           |                     |                                                                                                                                         |                                |                        |                                                                                                                         |                                  |                                                                                                                         |                                                                                                                                                                                                                                                                                                                                                                                                                                                                                                                                        |  |
|---------------------------|---------------------|-----------------------------------------------------------------------------------------------------------------------------------------|--------------------------------|------------------------|-------------------------------------------------------------------------------------------------------------------------|----------------------------------|-------------------------------------------------------------------------------------------------------------------------|----------------------------------------------------------------------------------------------------------------------------------------------------------------------------------------------------------------------------------------------------------------------------------------------------------------------------------------------------------------------------------------------------------------------------------------------------------------------------------------------------------------------------------------|--|
|                           |                     |                                                                                                                                         |                                |                        |                                                                                                                         |                                  | intensity and control)                                                                                                  |                                                                                                                                                                                                                                                                                                                                                                                                                                                                                                                                        |  |
|                           |                     |                                                                                                                                         |                                |                        |                                                                                                                         |                                  |                                                                                                                         | 3.7% of residents had daily pain that was at least one time excruciating in the previous week, reported more frequently in younger patients. 62.1% of them needed assistance in self-care, in activities of daily living but 48.8% had a normal cognitive status. More than 20% with daily pain that was excruciating at times had a cancer diagnosis, and 21.5% experienced weight loss. Pain, shortness of breath, vomiting, weight loss, and diarrhea were significantly prevalent in residents with cancer. Cancer treatments were |  |
| Teno et al. – 2004 [31]   | 2,138,442 residents | Daily Pain That Was Excruciating at Some Time in the Previous Week: Prevalence, Characteristics, and Outcomes in Nursing Home Residents | Nursing homes in US            | Cross-sectional study. | Persons just recently admitted to a NH as well as long-stay NH residents with a quarterly or annual MDS assessment.     | Data from version 2.0 of the MDS | Pain reported as daily and at its most excruciating in the previous week on the MDS at initial and follow-up assessment | Selection                                                                                                                                                                                                                                                                                                                                                                                                                                                                                                                              |  |
| Duncan et al. – 2009 [32] | 10,932 NH residents | Symptom Occurrence and Associated Clinical Factors in Nursing Home Residents with Cancer                                                | Nursing homes, Kansas City, US | Cross-sectional study  | All long-term care nursing home residents in the state of Kansas admitted between January 1, 2001 and December 31, 2003 | Data from MDS                    | Pain (MDS Pain Scale, intensity, frequency and Intensity), shortness of breath, vomiting, weight loss, and diarrhea     | Information                                                                                                                                                                                                                                                                                                                                                                                                                                                                                                                            |  |

|                              |                                                    |                                                                                   |                   |                                   |                                                                                                                                                                                                                                     |                                                                                                           |                                                                                                                                                                                 |                                                                                                                                                                                                                                                                                                                                               |             |
|------------------------------|----------------------------------------------------|-----------------------------------------------------------------------------------|-------------------|-----------------------------------|-------------------------------------------------------------------------------------------------------------------------------------------------------------------------------------------------------------------------------------|-----------------------------------------------------------------------------------------------------------|---------------------------------------------------------------------------------------------------------------------------------------------------------------------------------|-----------------------------------------------------------------------------------------------------------------------------------------------------------------------------------------------------------------------------------------------------------------------------------------------------------------------------------------------|-------------|
| Hunnicutt et al. – 2017 [33] | 78,160 Medicare beneficiaries with cancer in NH    | Hospice Use and Pain Management in Elderly Nursing Home Residents with Cancer     | Nursing homes, US | Descriptive retrospective study   | All Medicare beneficiaries with a validated date of death in 2011-2012 who had a comprehensive or quarterly MDS assessment <90 days before death, residents with an active MDS diagnosis of cancer listed                           | Data from Medicare Master Beneficiary Summary File and MDS 3.0, a medical record review for analgesic use | Pain and pain management at the last MDS assessment, severity was measured using either the Verbal Descriptor Scale or the Numeric Rating Scale                                 | significantly related to fewer delirium indicators. Hospice is associated with increased pain management with scheduled and PRN medications. Prevalence of pain was higher in residents who receive hospice care (59.9% vs 50%). Untreated pain was uncommon (self-reported pain: 2.9% and 5.6% in hospice users and nonusers, respectively). | Information |
| Monroe et al. – 2013 [34]    | 55 NH residents with dementia who died from cancer | Pain and hospice care in nursing home residents with dementia and terminal cancer | Nursing homes, US | Cross-sectional observation study | Nursing homes were stratified to include for-profit and not-for-profit, ranging in size from 68–180 beds located in and up to 150 miles from a large southern US metropolitan area (population >1.5 million). Decedents had to have | Data from MDS, chart review                                                                               | Dementia severity (Cognitive Performance Scale; [CPS] score); pain/discomfort (Discomfort Behavior Scale [DBS]) score; and opioid administration over the last 2 weeks of life. | 45% of residents were in hospice at the end-of-life. It increases likelihood of opioid pain treatment in residents with dementia and terminal cancer (OR = 3.9, 95%CI [1.1;14.0], P = 0.037). They were more likely                                                                                                                           | Information |

|                            |                                                                  |                                                                                    |                                    |                   |                                                                                                                                    |                       |                                                                                                                                    |                                                                                                                                                                                                                                                                                                                                                                                                                                  |
|----------------------------|------------------------------------------------------------------|------------------------------------------------------------------------------------|------------------------------------|-------------------|------------------------------------------------------------------------------------------------------------------------------------|-----------------------|------------------------------------------------------------------------------------------------------------------------------------|----------------------------------------------------------------------------------------------------------------------------------------------------------------------------------------------------------------------------------------------------------------------------------------------------------------------------------------------------------------------------------------------------------------------------------|
|                            |                                                                  |                                                                                    |                                    |                   | a diagnosis of dementia and must have died from cancer in the nursing home                                                         |                       |                                                                                                                                    | to receive an opioid analgesic during the last 2 weeks of life (80% vs 43%, P = 0.005), but less likely to show severe cognitive impairment (20% vs 50%, P = 0.050). Severe cognitive impairment was associated with a higher risk of suffering from untreated advanced cancer pain OR = 0.3, 95%CI [0.1;0.8], P = 0.030). 40% of NH residents with dementia who died from cancer did not receive any opioid at the end-of-life. |
| Reblin, et al. – 2017 [35] | 58 nurses, 101 hospice cancer patient and spouse caregiver dyads | Caregiver, patient, and nurse visit communication patterns in cancer home hospice. | 10 hospice agencies, New Jersey US | Descriptive study | Caregivers to individuals with a cancer diagnosis newly enrolled in-home hospice, over 45 years of age, spoke English, cognitively | Audio recorded visits | Definition of 2 dimensions: the patient/caregiver interacting with the nurse and the relatively high or low expression of distress | 6 visit communication patterns were identified and defined by 2 dimensions: Information (1) either the patient and/or caregiver interacting with the nurse and                                                                                                                                                                                                                                                                   |

|                        |                             |                                                                                                                                                    |                   |              |                                                                                                                                                                                        |                                                                                                                                                                                                                                         |                                                                                                                                                                                                                                                                                                                                                                                                                                                                                                                                                             |             |
|------------------------|-----------------------------|----------------------------------------------------------------------------------------------------------------------------------------------------|-------------------|--------------|----------------------------------------------------------------------------------------------------------------------------------------------------------------------------------------|-----------------------------------------------------------------------------------------------------------------------------------------------------------------------------------------------------------------------------------------|-------------------------------------------------------------------------------------------------------------------------------------------------------------------------------------------------------------------------------------------------------------------------------------------------------------------------------------------------------------------------------------------------------------------------------------------------------------------------------------------------------------------------------------------------------------|-------------|
|                        |                             |                                                                                                                                                    |                   |              | able to participate, and had at least 1 visit with their hospice nurse recorded                                                                                                        | during the visit                                                                                                                                                                                                                        | (2) the relatively high or low expression of distress during the visit. Time until death significantly predicted several clusters. 20% received adjuvants at admission and gabapentin was the most common at 34.4%. Advanced age ( $\geq 85$ ; aOR 0.80, 95%CI [0.63;1.02]) and comorbidities including dementia (aOR 0.65, 95%CI [0.53;0.82]) and depression (aOR: 1.55, 95%CI [1.29;1.87]) were associated with adjuvant use at admission. At 3 months, worse cognitive impairment (aOR: 0.80, 95%CI [0.64;0.99]) and presence of severe pain (aOR: 1.60, |             |
| Liu et al. – 2019 [36] | 3268 Medicare beneficiaries | Adjuvant Use and the Intensification of Pharmacologic Management for Pain in Nursing Home Residents with Cancer: Data from a US National Database. | Nursing homes, US | Cohort study | Active cancer diagnosis on MDS admission assessment; continuous Part D enrollment for $\geq 90$ days after admission; $\geq$ one Part D claim for an opioid within 7 days of admission | MDS 3.0. Part D claims provided information on opioid and adjuvant use during the 7 days after admission and 90 days later. Evaluation of the medication at admission period (within 7 days of admission); and 90 days after admission. | Prevalence of adjuvants to opioid therapy and changes in these agents for pharmacologic management in nursing home residents with cancer.                                                                                                                                                                                                                                                                                                                                                                                                                   | Information |

95%CI  
[1.26;2.03])  
were  
associated  
maintained  
or  
intensified  
analgesics  
in 25% of  
patients.

**Table S7.** Characteristics of studies, advanced care planning.

| Authors – Year         | Population                 | Object                                                                                                                    | Setting                       | Design                 | Inclusion Criteria                                                                                                    | Intervention                                                                        | Main Outcome Measures                | Results                                                                                                                                                                                                                                                                                                                                                                                 | Principal Source of Bias |
|------------------------|----------------------------|---------------------------------------------------------------------------------------------------------------------------|-------------------------------|------------------------|-----------------------------------------------------------------------------------------------------------------------|-------------------------------------------------------------------------------------|--------------------------------------|-----------------------------------------------------------------------------------------------------------------------------------------------------------------------------------------------------------------------------------------------------------------------------------------------------------------------------------------------------------------------------------------|--------------------------|
| Tseng et al. 2017 [37] | – 213 elderly NH residents | Factors Associated with the Do-Not-Resuscitate Decision Among Surrogates of Elderly Residents at a Nursing Home in Taiwan | Nursing home, northern Taiwan | Cross-sectional survey | Availability of family surrogates of elderly residents (65 years of age) and willingness to participate in this study | Questionnaires distributed to family surrogates or used in a face-to-face interview | Factors associated with DNR decision | Only 11.3% of residents had a signed DNR will or consent form. It depends on the culture, public knowledge toward DNR, legislation, and LTC facilities' policy, and nursing staff's workload and competence in communicating DNR with residents and family surrogates. Severe brain injury, a diagnosis of pulmonary disease or cancer are triggers for DNR decisions. Cancer residents | Selection                |

|                            |                                                    |                                                                                               |                                                                                        |                   |                                                                                                                                                                                |                                                                                                                                                                                                                                           |                                                                                                                                                                        |                                                                                                                                                                                                                                                                                            |           |
|----------------------------|----------------------------------------------------|-----------------------------------------------------------------------------------------------|----------------------------------------------------------------------------------------|-------------------|--------------------------------------------------------------------------------------------------------------------------------------------------------------------------------|-------------------------------------------------------------------------------------------------------------------------------------------------------------------------------------------------------------------------------------------|------------------------------------------------------------------------------------------------------------------------------------------------------------------------|--------------------------------------------------------------------------------------------------------------------------------------------------------------------------------------------------------------------------------------------------------------------------------------------|-----------|
| Epstein et al. – 2019 [38] | 67 cancer patients                                 | Giving Voice to Patient Values Throughout Cancer: A Novel Nurse-Led Intervention              | 3 clinics for patients with hematologic or gastrointestinal malignancies, New York, US | Pilot study       | > 21 years or older, English-speaking, with a new diagnosis of cancer made or confirmed at Memorial Sloan Kettering (MSK) Institutional Review Board, establishing care at MSK | Trained oncology nurses for using specific questions and an empathic communication framework to discuss health-related values during outpatient clinic visits.                                                                            | Feasibility and acceptability                                                                                                                                          | have a higher likelihood of completed DNR forms. Patients founded discussions helpful and felt comfortable with the process. Professionals perceived an improvement of care quality by normalizing such discussions and establishing a framework for shared decision making going forward. | Volunteer |
| Walling et al. – 2017 [39] | Approximately 10,000 patients with advanced cancer | Effect and efficiency of an embedded palliative care nurse practitioner in an oncology clinic | 2 oncology clinic, Los Angeles, US                                                     | Prospective study | Patients with incurable referred by oncologists                                                                                                                                | Simultaneous care model by embedding a palliative care nurse practitioner in an oncology clinic. Implementation strategies (structured referral mechanism, routine symptom screening, integration of a psychology-based cancer supportive | Tasks (Symptom Assessment Basic, Symptom Assessment Medical, Symptom Assessment Psychosocial, Communication Basic, Communication Complex) and then computed time spent | It increased the likelihood to document advance care planning (30% v 17%; P, .01) and to receive referral for psychosocial support (46% v 16%; P, .01) compared to no palliative care nurse.                                                                                               | Sampling  |

|                          |                                       |                                                                                                                                      |                                                                  |                                          |                                                                                      |                                                                                                                                |                                                                                                                                                                                                                                                                                                                                                                       |                                                 |
|--------------------------|---------------------------------------|--------------------------------------------------------------------------------------------------------------------------------------|------------------------------------------------------------------|------------------------------------------|--------------------------------------------------------------------------------------|--------------------------------------------------------------------------------------------------------------------------------|-----------------------------------------------------------------------------------------------------------------------------------------------------------------------------------------------------------------------------------------------------------------------------------------------------------------------------------------------------------------------|-------------------------------------------------|
|                          |                                       |                                                                                                                                      |                                                                  |                                          |                                                                                      | care center, implementation team meetings, team training, and a metrics dashboard for continuous quality improvement).         |                                                                                                                                                                                                                                                                                                                                                                       |                                                 |
|                          |                                       |                                                                                                                                      |                                                                  |                                          |                                                                                      |                                                                                                                                | Resuscitative care orders: 40% in DAL 15% in LTC; medical care to prolong life 35% in DAL 55%; comfort care 6% in DAL and 25% in LTC. Residents were present in conversation 46%, not participation 41%; documented family member in 28%. Resident with cognitive impairment documented present in 20%. Presence of a nurse in 67%, physicians 34% social worker 16%. |                                                 |
| Dyason et al – 2015 [40] | 166 LTC residents                     | Advance care planning discussions among residents of long-term care and designated assisted living; experience from Calgary, Alberta | Long term care and designated assisted living on Calgary, Canada | Evaluation and quality improvement audit | Older than 50 years old, minimum length of stay of 45 days in LTC or 90 days in DAL. | Review of tracking forms and charts about participation in ACP at baseline, 6 months and 18 months after policy implementation | Documentation of ACP orders, participation of the patient, presence or not of cognitive impairment                                                                                                                                                                                                                                                                    | Information                                     |
| Bai et al. – 2010 [41]   | 146 patients with advanced cancer, 66 | Attitudes towards palliative care among                                                                                              | One provincial and one municipal                                 | Cross-sectional survey                   | Patients who were diagnosed with cancer                                              | Structured questionnaires                                                                                                      | Attitudes of terminally ill patients and health                                                                                                                                                                                                                                                                                                                       | The majority accepted death as a<br>Information |

|                             |                        |                                                                                                               |                                                                         |                                   |                                                                                                                                                           |                                                                                                                                                                  |                                                                                                                                    |                                                                                                                                                                                                                                                                                                                                                                                                                                                                                                                                                                                                |
|-----------------------------|------------------------|---------------------------------------------------------------------------------------------------------------|-------------------------------------------------------------------------|-----------------------------------|-----------------------------------------------------------------------------------------------------------------------------------------------------------|------------------------------------------------------------------------------------------------------------------------------------------------------------------|------------------------------------------------------------------------------------------------------------------------------------|------------------------------------------------------------------------------------------------------------------------------------------------------------------------------------------------------------------------------------------------------------------------------------------------------------------------------------------------------------------------------------------------------------------------------------------------------------------------------------------------------------------------------------------------------------------------------------------------|
|                             | doctors and 106 nurses | patients and health professionals in Henan, China                                                             | oncology hospital, and three community healthcare centers, Henan, China |                                   | at stage IV in the participating oncology hospitals, frontline doctors and nurses working in the participating community healthcare centers and hospitals |                                                                                                                                                                  | professional s towards palliative care                                                                                             | natural life process, but nearly half of the patients believe life preservation was their major care goal. They were unclear about their diagnosis and prognosis. The majority of health professional respondents affirmed the importance of palliative care. Less than half was trained or were willing to deliver the relevant care. Patients with organ failure have a linear average functional decline with 6.5 points per year, and average function score at death of 68.6, CI [62.4;74.8]. The cancer and frail residents had significant curvilinear terms. The frail residents had a |
| Lawrence et al. – 2017 [42] | 247 residents          | Identification of the trajectory of functional decline for advance care planning in a nursing home population | 4 nursing home facilities, southern Tasmania                            | Retrospective, longitudinal study | Patients admitted to the NH after March 1997 and whose death occurred before March 2008.                                                                  | Paper-based records of deceased residents, Cause-of-death data were obtained by data matching with the Tasmanian register of Births, Deaths and Marriages (BDM). | Shape of the trajectories of functional decline grouped by their diagnosis, how trajectories can improve end of-life care planning | Information                                                                                                                                                                                                                                                                                                                                                                                                                                                                                                                                                                                    |



|                         |                      |                                                                                                                                 |                       |                            |                                                                                                                                                                                                                                                                                       |                                                                                                 |                                                                                                                                                                                      |                                                                                                                                                                                                                                                                                                                                       |
|-------------------------|----------------------|---------------------------------------------------------------------------------------------------------------------------------|-----------------------|----------------------------|---------------------------------------------------------------------------------------------------------------------------------------------------------------------------------------------------------------------------------------------------------------------------------------|-------------------------------------------------------------------------------------------------|--------------------------------------------------------------------------------------------------------------------------------------------------------------------------------------|---------------------------------------------------------------------------------------------------------------------------------------------------------------------------------------------------------------------------------------------------------------------------------------------------------------------------------------|
| Dobalian –<br>2005 [43] | 5899 NH<br>residents | Advanced<br>care<br>planning<br>documents<br>in nursing<br>facilities:<br>results from<br>a nationally<br>representative survey | 815<br>facilities, US | Retrospective cohort study | Facility or distinct unit of a facility that was either certified by Medicare or Medicaid or licensed as a nursing facility with 3 or more beds and providing onsite 24-hour skilled nursing care, residents living in the facility on January 1 1996 and those admitted during 1996. | Data from 1996 Nursing Home Component (NHC) of the Medical Expenditure Panel Survey (MEPS), MDS | Presence of DNR orders, Resuscitate orders, feeding/medications/other treatment restrictions and living wills correlated with clinical, demographic, facility, and regional factors. | slower rate of decline at 9.54 points per year and were most care dependent at death, with an average function score of 77.1, CI [73.8; 80.9].<br><br>were more prevalent among residents aged 75 and those with severe cognitive impairment, emphysema, and cancer, but less common among African Americans and Latinos than whites. |
|-------------------------|----------------------|---------------------------------------------------------------------------------------------------------------------------------|-----------------------|----------------------------|---------------------------------------------------------------------------------------------------------------------------------------------------------------------------------------------------------------------------------------------------------------------------------------|-------------------------------------------------------------------------------------------------|--------------------------------------------------------------------------------------------------------------------------------------------------------------------------------------|---------------------------------------------------------------------------------------------------------------------------------------------------------------------------------------------------------------------------------------------------------------------------------------------------------------------------------------|

**TableS 8.** Characteristics of studies, end of life.

| Authors – year              | Population   | Object                                                                                                                                       | Setting                                                     | Design                      | Inclusion criteria                                                                                                                                                                     | Intervention               | Main measures                                                             | Outcome | Results                                                                                                                                                |
|-----------------------------|--------------|----------------------------------------------------------------------------------------------------------------------------------------------|-------------------------------------------------------------|-----------------------------|----------------------------------------------------------------------------------------------------------------------------------------------------------------------------------------|----------------------------|---------------------------------------------------------------------------|---------|--------------------------------------------------------------------------------------------------------------------------------------------------------|
| Sommerbak et al – 2016 [44] | 20 employees | Barriers to and facilitators for implementing quality improvements in palliative care – results from a qualitative interview study in Norway | 2 hospitals, 1 nursing home, 2 local medical centers Norway | Qualitative interview study | Employees directly involved in providing clinical PC (nurses and physicians) or involved in the organization of PC (managers). At least one year working experience within the service | Semi-structured interviews | Barriers or facilitators for improving PC in cancer and dementia settings |         | Three specific barriers: diverse characteristics of symptom assessment, inappropriate changes at odds with care philosophy (medical focus) and lack of |

|                              |                                                                                       |                                                                                                                                                                                                                                                                                                                                                     |                                                                                                                                               |                                              |                                                                                                                                                                                                                                                                        |                                                                                                                       |                                                                                                                                                                                                                                                                                      |                                                                                                                                                                                                                                                                                                                                       |
|------------------------------|---------------------------------------------------------------------------------------|-----------------------------------------------------------------------------------------------------------------------------------------------------------------------------------------------------------------------------------------------------------------------------------------------------------------------------------------------------|-----------------------------------------------------------------------------------------------------------------------------------------------|----------------------------------------------|------------------------------------------------------------------------------------------------------------------------------------------------------------------------------------------------------------------------------------------------------------------------|-----------------------------------------------------------------------------------------------------------------------|--------------------------------------------------------------------------------------------------------------------------------------------------------------------------------------------------------------------------------------------------------------------------------------|---------------------------------------------------------------------------------------------------------------------------------------------------------------------------------------------------------------------------------------------------------------------------------------------------------------------------------------|
| Irvin et al – 2000 [45]      | 5 registered nurses                                                                   | The experiences of the registered nurse caring for the resident dying of cancer in a nursing home. Quality palliative care for cancer and dementia in five European countries: some common challenges; investigate the factors that affect the quality of palliative care and care of dying, particularly but not exclusively for dementia syndrome | Nursing home, Australia                                                                                                                       | Qualitative single case study                | Minimum of 12 months experience working in the nursing home this setting,                                                                                                                                                                                              | Unstructured in-depth interviews and reflective journals.                                                             | Experiences of caring for a resident who was in the palliative care phase of a cancer illness.                                                                                                                                                                                       | Exclusivity of the management of impacts of caring                                                                                                                                                                                                                                                                                    |
| Davies N et al – 2013 [46]   | 7 professionals providing palliative care for patients with either cancer or dementia | Increasing understanding of dying of breast cancer: Comorbidities and care                                                                                                                                                                                                                                                                          | Cancer and palliative, primary, secondary and tertiary care settings from 5 European countries (England, Germany, Italy, Netherlands, Norway) | Semi-structured interviews, quality study    | Clinical practitioners who provide dedicated palliative care within the settings, service management and those developing and implementing high level guidelines and policies designed to support high quality palliative care in primary, secondary and tertiary care | Semi-structured interviews                                                                                            | Challenges                                                                                                                                                                                                                                                                           | 5 common challenges/difficulties: the various structural/functional services; the difficult palliative care service processes of definitions, knowledge inclusiveness) and constraints.                                                                                                                                               |
| Johnston et al – 2016 [47]   | 121,458 NH residents                                                                  | Mortality in Nursing Home Residents Without Cognitive Impairment and Its Relation to Self-Reported Health-Related Quality of Life, Sociodemographic Factors, Illness Variables and Cancer Diagnosis: A 5-year Follow-Up Study                                                                                                                       | Nursing homes, Nova Scotia, Canada                                                                                                            | Population-based study                       | All 121,458 Nova Scotia residents who died in the province from 1995 to 2009. These decedents were identified in the Nova Scotia Vital Statistics (VS) database.                                                                                                       | Linked administrative data from population-based registries were used to examine deaths in Nova Scotia from 1995–2009 | Palliative program enrollment, time from palliative program enrollment to death, and place of death (hospital, nursing home, own home).                                                                                                                                              | Mean age of breast was similar to the decedents (72.0 versus age spread was greater 23.1% versus 16.7%, versus 6.5%). Among breast cancer, 15.6% versus cardiovascular registry, cancer decedents, decedents were twice as likely to die in a nursing home compared to cancer decedents.                                              |
| Drage et al – 2013 [48]      | 227 cognitively intact older residents                                                | Factors Associated with Acute Care Use Among Nursing Home Residents Dying of Cancer: A Population-Based Study                                                                                                                                                                                                                                       | 30 nursing homes in Norway                                                                                                                    | Cross-sectional study                        | All cognitively intact NH residents aged 65 years and older who were capable of carrying out a conversation and had been residing in the NH for at least 6 months                                                                                                      | Face-to-face interview                                                                                                | Self-reported HRQOL on SF-36 scale compared to general population and to residents without a cancer diagnosis                                                                                                                                                                        | Survival did not differ between residents with and without cancer (HR = 0.31). Twenty percent with cancer and 13% were still alive. After adjusting for sociodemographic and increasing age (education (P = 0.009), 0.04) and the subdomain functioning (P = 0.08) mortality, Bodily functioning was marginally associated (P = 0.08) |
| Bainbridge et al – 2015 [49] | 1196 NH residents deceased of cancer cause                                            | End of Life Care for Long-Term Care Residents with                                                                                                                                                                                                                                                                                                  | Nursing homes, Ontario, Canada                                                                                                                | Population-based, retrospective cohort study | All decedents with a cancer-confirmed cause of death from the Ontario Cancer Registry lived in LTC 6–7 months (182–212 days) before death                                                                                                                              | Data extracted from administrative healthcare datasets                                                                | Emergency department visit: the dichotomous variable defined as whether or not there was an emergency department visit in the last 6 months of life; Death in acute care: the dichotomous variable was defined as whether or not the person died in hospital or emergency department | 61% had visited emergency department in the last 6 months and 20% had died in hospital or emergency department associated with having an emergency department visit in the last 6 months of life; Death in acute care: the dichotomous variable was defined as whether or not the person died in hospital or emergency department     |
| Boyd et al – 2019 [50]       | 286 deceased residents                                                                | End of Life Care for Long-Term Care Residents with                                                                                                                                                                                                                                                                                                  | Long-term facilities, New Zealand                                                                                                             | Prospective survey                           | Random cluster sample of 61 representative facilities. Facilities were                                                                                                                                                                                                 | Standardized questionnaires – Symptom Management (SM-EOLD) and Comfort Assessment in End of life with Dementia        | Trajectories before death in LTC for those with cancer, dementia or chronic illness including resident's condition 1 month before death,                                                                                                                                             | Diagnosis at the time of death: dementia (49%), cancer (17%), and other (34%). There was no SM-EOLD in the last diagnosis (cancer 26.5 (SD 8                                                                                                                                                                                          |

|                         |                                                  |                                                                                                             |                                                  |                             |                                                                                                                                                                  |                                                                     |                                                                                                                                                                                                                                                                |                                                                                                                                                                     |
|-------------------------|--------------------------------------------------|-------------------------------------------------------------------------------------------------------------|--------------------------------------------------|-----------------------------|------------------------------------------------------------------------------------------------------------------------------------------------------------------|---------------------------------------------------------------------|----------------------------------------------------------------------------------------------------------------------------------------------------------------------------------------------------------------------------------------------------------------|---------------------------------------------------------------------------------------------------------------------------------------------------------------------|
|                         |                                                  | Dementia, Chronic Illness and Cancer: Prospective Staff Survey                                              |                                                  |                             | stratified by region, size (up to 70 beds, and over 70 beds), and by for-profit or not-for-profit status.                                                        | (CAD-EOLD) – were administered to staff after the resident's death. | identification of sentinel events, symptom management 1 month prior to death using the SM-EOLD, such as management of restlessness, depression, fear and anxiety, pain, shortness of breath, and skin breakdown                                                | 26.9 (SD 8.6)). There was a mean CAD-EOLD score of 34.4 (SD 5.2), chronic disease burden was 33.3 (SD 5.1), dementia had more symptoms and those with less anxiety. |
| Kiely et al – 2002 [51] | 120 newly admitted and long-stay residents       | 348 Common and gender specific factors associated with one-year mortality in nursing home residents         | 2 nursing home facilities, state of New York, US | Retro-spective cohort study | > 65 years of age, resided 665, newly admitted or 647 long-stay in New York nursing homes facilities between June and December 1997, death information was known | Minimum Data Set                                                    | Measures of health, functional, cognitive, psychological and social status                                                                                                                                                                                     | Cancer was more associated with mortality in women (HR 2.21) in residents.                                                                                          |
| Cagle et al – 2020 [52] | 1209 participants who died between 2012 and 2014 | Hospice Utilization in the United States: A Prospective Cohort Study Comparing Cancer and Noncancer Deaths. | US                                               | Prospective cohort study    | Data from the 2012 survey wave to predict hospice use in general, and then separately for cancer and non-cancer deaths.                                          | Hospice utilization rate for cancer and non-cancer death            | Hospice utilization rate was 70.8% for cancer deaths and 34.8% for noncancer deaths. A health OR 0.79, dementia OR 5.47 were higher odds of receiving hospice. Among cancer deaths, male gender and female gender were only predictors of hospice utilization. |                                                                                                                                                                     |

Table S9. Characteristics of studies, nursing home care.

| Authors - Year           | Population           | Object                                                                                                        | Setting                    | Design       | Inclusion Criteria                                                                                                                                                                                                                            | Intervention                                                                       | Main Outcome Measures                                                                            | Results                                                                                                                                                                                                                                                                    | Principal Source of Bias |
|--------------------------|----------------------|---------------------------------------------------------------------------------------------------------------|----------------------------|--------------|-----------------------------------------------------------------------------------------------------------------------------------------------------------------------------------------------------------------------------------------------|------------------------------------------------------------------------------------|--------------------------------------------------------------------------------------------------|----------------------------------------------------------------------------------------------------------------------------------------------------------------------------------------------------------------------------------------------------------------------------|--------------------------|
| Zueger et al – 2019 [53] | 88 957 beneficiaries | Older Medicare Beneficiaries Frequently Continue Medications with Limited Benefit Following Hospice Admission | Nursing homes, Chicago, US | Cohort study | Enrolled and subsequently died in hospice between January 1, 2008, and December 31, 2013, any enrollment in a Medicare Advantage plan, 66 years and older who were admitted to and died under hospice care (for cancer and non-cancer causes) | Following of dispensing of limited benefit medications from SEER-Medicare database | Continuation of at least one LBM between the date of admission in hospice care and date of death | Patients admitted to hospice for cancer continued at least one LBM after admission in 29.8%, and 30.5% for patients with non-cancer related cause. The medications most frequently continued were anti-dementia (29.3%) while antiosteoporosis medications were less often | Selection                |

|                            |                   |                                                                        |                                  |                        |                                                                                                                                      |                                                                               |                                                                                    |                                                                                                                                                                                             |           |                                                                                                                                                                                                                                                |
|----------------------------|-------------------|------------------------------------------------------------------------|----------------------------------|------------------------|--------------------------------------------------------------------------------------------------------------------------------------|-------------------------------------------------------------------------------|------------------------------------------------------------------------------------|---------------------------------------------------------------------------------------------------------------------------------------------------------------------------------------------|-----------|------------------------------------------------------------------------------------------------------------------------------------------------------------------------------------------------------------------------------------------------|
|                            |                   |                                                                        |                                  |                        |                                                                                                                                      |                                                                               |                                                                                    |                                                                                                                                                                                             |           | maintained (14.1%).                                                                                                                                                                                                                            |
|                            |                   |                                                                        |                                  |                        |                                                                                                                                      |                                                                               |                                                                                    |                                                                                                                                                                                             |           | LBM                                                                                                                                                                                                                                            |
|                            |                   |                                                                        |                                  |                        |                                                                                                                                      |                                                                               |                                                                                    |                                                                                                                                                                                             |           | continuation was                                                                                                                                                                                                                               |
|                            |                   |                                                                        |                                  |                        |                                                                                                                                      |                                                                               |                                                                                    |                                                                                                                                                                                             |           | greater in                                                                                                                                                                                                                                     |
|                            |                   |                                                                        |                                  |                        |                                                                                                                                      |                                                                               |                                                                                    |                                                                                                                                                                                             |           | skilled nursing                                                                                                                                                                                                                                |
|                            |                   |                                                                        |                                  |                        |                                                                                                                                      |                                                                               |                                                                                    |                                                                                                                                                                                             |           | compared to home                                                                                                                                                                                                                               |
|                            |                   |                                                                        |                                  |                        |                                                                                                                                      |                                                                               |                                                                                    |                                                                                                                                                                                             |           | hospice (RR 1.25, 95%CI [1.20;1.29]),                                                                                                                                                                                                          |
|                            |                   |                                                                        |                                  |                        |                                                                                                                                      |                                                                               |                                                                                    |                                                                                                                                                                                             |           | non-skilled nursing (RR 1.29, 95%CI [1.25;1.32]),                                                                                                                                                                                              |
|                            |                   |                                                                        |                                  |                        |                                                                                                                                      |                                                                               |                                                                                    |                                                                                                                                                                                             |           | and assisted living facilities (RR 1.28, 95%CI [1.24;1.32]).                                                                                                                                                                                   |
|                            |                   |                                                                        |                                  |                        |                                                                                                                                      |                                                                               |                                                                                    |                                                                                                                                                                                             |           | Time from inclusion in the sample in 2004–2005 until the first hospital admission.                                                                                                                                                             |
|                            |                   |                                                                        |                                  |                        |                                                                                                                                      |                                                                               |                                                                                    |                                                                                                                                                                                             |           | For residents with no hospital admission after inclusion, it was the time until the end of follow-up (in 2010). For people dying in the NH before the first hospital admission, the time until death was recorded and treated it as a censored |
| Drageset et al – 2015 [54] | 227 LTC residents | Acute Hospital Admission for Nursing                                   | 30 nursing homes, Bergen, Norway | Cross-sectional design | Age 65 years or older, resided in the NH for at least 6 months and cognitively intact and was capable of carrying out a conversation | Data obtained on Social Provision Scale (SPS) through face-to-face interviews | Time from inclusion in the sample in 2004–2005 until the first hospital admission. | Residents with cancer had more admissions (25/60) than those without (53/167) (odds ratio 1.7). Social integration was correlated with admission (P = 0.04) regardless of cancer diagnosis. | Volunteer |                                                                                                                                                                                                                                                |
|                            |                   | Home Residents Without Cognitive Impairment with a Diagnosis of Cancer |                                  |                        |                                                                                                                                      |                                                                               |                                                                                    |                                                                                                                                                                                             |           |                                                                                                                                                                                                                                                |



|                          |           |                                                                                                                   |                                                                   |                   |                                                                                                                                                                        |                        |                                                                            |                                                                                                                                                                                                                                                                                                                                                                                                                                                                                                                                                   |        |
|--------------------------|-----------|-------------------------------------------------------------------------------------------------------------------|-------------------------------------------------------------------|-------------------|------------------------------------------------------------------------------------------------------------------------------------------------------------------------|------------------------|----------------------------------------------------------------------------|---------------------------------------------------------------------------------------------------------------------------------------------------------------------------------------------------------------------------------------------------------------------------------------------------------------------------------------------------------------------------------------------------------------------------------------------------------------------------------------------------------------------------------------------------|--------|
| Aamodt et al – 2013 [57] | 10 nurses | Nurses' perspectives on the discharge of cancer patients with palliative care needs from a gastroenterology ward. | Gastroenterology surgical ward at the university hospital, Norway | Descriptive study | Registered nurse, minimum 3 months' nursing experience with cancer patients receiving palliative care on the ward, experience with patient discharge planning, able to | Focus group interviews | Nurses' recommendations for optimal patient follow-up care after discharge | n only in nursing homes. Blood diseases, gastrointestinal tract diseases, infection, chronic obstructive pulmonary disease, dementia and cancer were the factors associated with malnutrition in hospitals. Dementia was associated with malnutrition in nursing homes, while gastrointestinal tract diseases, diabetes mellitus and cancer were the associated factors in home care. Two themes: 'the complexity of and fluctuations in the patients' health status' and 'considering the competency of the nurses at the discharge destinations | Recall |
|--------------------------|-----------|-------------------------------------------------------------------------------------------------------------------|-------------------------------------------------------------------|-------------------|------------------------------------------------------------------------------------------------------------------------------------------------------------------------|------------------------|----------------------------------------------------------------------------|---------------------------------------------------------------------------------------------------------------------------------------------------------------------------------------------------------------------------------------------------------------------------------------------------------------------------------------------------------------------------------------------------------------------------------------------------------------------------------------------------------------------------------------------------|--------|

|                            |                                  |                                                                                            |                                  |                                       |                                                                                                                                                                                                                                |                                                                     |                                                                                                                                                                                                                         |                                                                                                                                                                                                                                                                                                                                                                                                                                                                     |                                                                                                                  |
|----------------------------|----------------------------------|--------------------------------------------------------------------------------------------|----------------------------------|---------------------------------------|--------------------------------------------------------------------------------------------------------------------------------------------------------------------------------------------------------------------------------|---------------------------------------------------------------------|-------------------------------------------------------------------------------------------------------------------------------------------------------------------------------------------------------------------------|---------------------------------------------------------------------------------------------------------------------------------------------------------------------------------------------------------------------------------------------------------------------------------------------------------------------------------------------------------------------------------------------------------------------------------------------------------------------|------------------------------------------------------------------------------------------------------------------|
| Graziano et al – 2019 [58] | 1843 residents with polypharmacy | Deprescribing in Nursing Home Residents on Polypharmacy: Incidence and Associated Factors. | Nursing homes, Europe and Israel | Longitudinal multicenter cohort study | 57 nursing home facilities where residents were assessed by the inter-RAI instrument for Long Term Care Facilities (the interRAI LCTF), from Czech Republic, England, Finland, France, Germany, Netherlands , Italy and Israel | Data from the Services and Health in Long TERm care study (SHELTER) | Incidence of deprescribing (defined as a reduction in the number of medications used over the study period) and factors related to deprescribing<br>Polypharmacy defined as the concurrent use of 5 or more medications | Mean number of medications was 8.6 at the baseline. Deprescribing was observed in 35.6% of residents.<br>Risk factors for deprescription were cognitive impairment (mild/moderate OR 1.41, 95%CI [1.11;1.79], severe OR 1.41, 95%CI [1.15;1.72]), presence of the geriatrician within the facility staff (OR 1.41, 95%CI [1.15;1.72]), and number of medications used at baseline (OR 1.10, 95%CI [1.06; 1.14]). The factors associated with a lower probability of | participate in a 60–90-minute session, and able to speak and read Norwegian in order to consent to participation |
|----------------------------|----------------------------------|--------------------------------------------------------------------------------------------|----------------------------------|---------------------------------------|--------------------------------------------------------------------------------------------------------------------------------------------------------------------------------------------------------------------------------|---------------------------------------------------------------------|-------------------------------------------------------------------------------------------------------------------------------------------------------------------------------------------------------------------------|---------------------------------------------------------------------------------------------------------------------------------------------------------------------------------------------------------------------------------------------------------------------------------------------------------------------------------------------------------------------------------------------------------------------------------------------------------------------|------------------------------------------------------------------------------------------------------------------|





(45.4% vs. 28.7%,  $p < 0.01$ ). Full dependence in ADLs (OR 1.70,  $P < 0.01$ ), CHF (OR 1.48,  $P < 0.01$ ), and COPD (OR 1.28,  $P < 0.01$ ) were associated with higher risk of burdensome EOL transition. Those with do-not-resuscitate directives (OR 0.60,  $P < 0.01$ ) and impaired cognition (OR 0.89,  $p < 0.01$ ) had lower odds of burdensome EOL transition.

Table S10. Characteristics of studies, education.

| Authors - Year              | Population | Object                                                                                                                                              | Setting                                                                                                                                  | Design                      | Inclusion Criteria                                                                                                                                             | Intervention                                                                                                                                              | Main Outcome Measures                                                                                                   | Results                                                                                                                                                     | Principal Source of Bias |
|-----------------------------|------------|-----------------------------------------------------------------------------------------------------------------------------------------------------|------------------------------------------------------------------------------------------------------------------------------------------|-----------------------------|----------------------------------------------------------------------------------------------------------------------------------------------------------------|-----------------------------------------------------------------------------------------------------------------------------------------------------------|-------------------------------------------------------------------------------------------------------------------------|-------------------------------------------------------------------------------------------------------------------------------------------------------------|--------------------------|
| Nagamatsu et al – 2014 [60] | 188 nurses | Impact of a nursing education program about caring for patients in Japan with malignant pleural mesothelioma on nurses' knowledge, difficulties and | Hospitals with respiratory wards or palliative care wards, cancer hospitals, home visiting nurse stations and health care centers, Japan | Randomized controlled study | Recruitment by advertisement letters sent nationwide to the heads or nursing directors of health care facilities targeting hospitals with respiratory wards or | 2-day program with a half-day follow-up program included lectures, group work, and group discussion. Knowledge and attitude difficulties were measured at | Knowledge of and treatment of MPM, difficulties in caring for patients with MPM, and attitude toward patients with MPM. | The knowledge, difficulty and attitude scores were favorable with the post-test and follow-up test 1 month later. The Knowledge score ( $t = 14.03$ , $p =$ | Selection                |

|                             |                                                                     |                                                                                                                                       |                                                               |                 |                                                                                                |                                                                                                                                                                                |                                                                                    |                                                                                                                                                                                                                                                                                                                                                                                                                                                                                                                                                                                                                                |  |
|-----------------------------|---------------------------------------------------------------------|---------------------------------------------------------------------------------------------------------------------------------------|---------------------------------------------------------------|-----------------|------------------------------------------------------------------------------------------------|--------------------------------------------------------------------------------------------------------------------------------------------------------------------------------|------------------------------------------------------------------------------------|--------------------------------------------------------------------------------------------------------------------------------------------------------------------------------------------------------------------------------------------------------------------------------------------------------------------------------------------------------------------------------------------------------------------------------------------------------------------------------------------------------------------------------------------------------------------------------------------------------------------------------|--|
|                             |                                                                     | attitude: a randomized control trial                                                                                                  |                                                               |                 | palliative care wards, cancer hospitals, home visiting nurse stations and health care centers. | baseline and a post-test and at follow-up one month later.                                                                                                                     |                                                                                    | 0.000) and follow-up test (t = 8.98, p = 0.000). Difficulty score (t = -3.41, p = 0.001) and follow-up test (t = -3.70, p = 0.000). The Attitude score (t = 7.11, p = 0.000) and follow-up test (t = 4.54, p = 0.000). Provider-rated self-efficacy was significantly higher for nine of 10 skill outcomes (p < 0.005) including acknowledging patient anger, discussing anger, considering solutions, and using relaxation to manage their own distress. Average concordance with the experts (86% overall agreement) among oncologist and nurse raters for somatic symptoms (Case 1 82%; Case 2 91%) was higher overall than |  |
| Gerhart et al – 2017 [61]   | 12 clinicians from an SCT team and inpatient oncology nursing staff | Brief Training on Patient Anger Increases Oncology Providers' Self-Efficacy in Communicating with Angry Patients.                     | Midwestern academic medical center, Chicago, US               | Posttest design | Providers working in stem cell transplant and oncology units                                   | Brief provider training program by cognitive behavioral models of anger that included didactics, discussion, and experimental training on communication and stress management. | Feasibility for increasing providers' self-efficacy in responding to patient anger | Volunteer                                                                                                                                                                                                                                                                                                                                                                                                                                                                                                                                                                                                                      |  |
| Passik SD et al – 2000 [62] | 14 oncologists and 18 nurses                                        | Oncology staff recognition of depressive symptoms on videotaped interviews of depressed cancer patients: implications for designing a | Rural community, hospital-based outreach network, Indiana, US | Posttest design | Not informed                                                                                   | It was given a one-hour in-service on the use of the Mini International Neuropsychiatric Interview to provide a differential diagnosis. Then, staff viewed a videotape of      | MD and RN Concordance Rates                                                        | Sampling                                                                                                                                                                                                                                                                                                                                                                                                                                                                                                                                                                                                                       |  |

|                              |                    |                                                                                                                                              |                                                              |                             |                                                                                                                                                                                        |                                                                                                                                          |                                                                                                                        |                                                                                                                                                                                                                                                                                                                                                                                                                                      |           |
|------------------------------|--------------------|----------------------------------------------------------------------------------------------------------------------------------------------|--------------------------------------------------------------|-----------------------------|----------------------------------------------------------------------------------------------------------------------------------------------------------------------------------------|------------------------------------------------------------------------------------------------------------------------------------------|------------------------------------------------------------------------------------------------------------------------|--------------------------------------------------------------------------------------------------------------------------------------------------------------------------------------------------------------------------------------------------------------------------------------------------------------------------------------------------------------------------------------------------------------------------------------|-----------|
|                              |                    | training program.                                                                                                                            |                                                              |                             |                                                                                                                                                                                        | an investigator utilizing the MINI to interview two depressed breast cancer patients and rated depressive symptoms and made a diagnosis. |                                                                                                                        | for cognitive symptoms (78% overall; Case 1 91%; Case 2 65%). Raters reported a greater level of confidence about their diagnosis for Case 1 (94%) than for Case 2 (64%). 3 specific barriers to palliative care: diverse characteristics of patients makes symptom assessment tools inappropriate, tension caused by changes at odds with the holistic hospice care philosophy (example: more medical focus) and lack of expertise. |           |
| Sommerbakk et al – 2016 [44] | 20 employees       | Barriers to and facilitators for implementing quality improvements in palliative care – results from a qualitative interview study in Norway | 2 hospitals, 1 nursing home, 2 local medical centers, Norway | Qualitative interview study | Employees directly involved in providing clinical PC (nurses and physicians) or involved in the organization of PC (managers). At least one year working experience within the service | Semi-structured interviews                                                                                                               | Barriers or facilitators for improving PC in cancer and dementia settings                                              | inappropriate, tension caused by changes at odds with the holistic hospice care philosophy (example: more medical focus) and lack of expertise.                                                                                                                                                                                                                                                                                      | Selection |
| Hee-Soon et al – 2006 [63]   | 40 clinical nurses | Development and evaluation of a PBL-based continuing education for clinical nurses: a pilot study                                            | University hospital, Seoul, Korea                            | Pilot study                 | Nurses at a university hospital located in Seoul                                                                                                                                       | PBL packages with simulation on ACLS, program consisted of six 3-hour weekly classes and was evaluated by the                            | Evaluation of the program after its implementation: perceived advantages and disadvantages of PBL, and the possibility | 57.5% of the participants responded positively about the use of PBL as continuing education in terms of self-motivated                                                                                                                                                                                                                                                                                                               | Selection |

|  |  |  |  |  |  |  |  |  |  |  |  |  |  |  |  |  |  |  |  |  |  |  |  |  |  |  |  |  |  |  |  |  |  |  |  |  |  |  |  |  |  |  |  |  |  |  |  |  |  |  |  |  |  |  |  |  |  |  |  |  |  |  |  |  |  |  |  |  |  |  |  |  |  |  |  |  |  |  |  |  |  |  |  |  |  |  |  |  |  |  |  |  |  |  |  |  |  |  |  |  |  |  |  |  |  |  |  |  |  |  |  |  |  |  |  |  |  |  |  |  |  |  |  |  |  |  |  |  |  |  |  |  |  |  |  |  |  |  |  |  |  |  |  |  |  |  |  |  |  |  |  |  |  |  |  |  |  |  |  |  |  |  |  |  |  |  |  |  |  |  |  |  |  |  |  |  |  |  |  |  |  |  |  |  |  |  |  |  |  |  |  |  |  |  |  |  |  |  |  |  |  |  |  |  |  |  |  |  |  |  |  |  |  |  |  |  |  |  |  |  |  |  |  |  |  |  |  |  |  |  |  |  |  |  |  |  |  |  |  |  |  |  |  |  |  |  |  |  |  |  |  |  |  |  |  |  |  |  |  |  |  |  |  |  |  |  |  |  |  |  |  |  |  |  |  |  |  |  |  |  |  |  |  |  |  |  |  |  |  |  |  |  |  |  |  |  |  |  |  |  |  |  |  |  |  |  |  |  |  |  |  |  |  |  |  |  |  |  |  |  |  |  |  |  |  |  |  |  |  |  |  |  |  |  |  |  |  |  |  |  |  |  |  |  |  |  |  |  |  |  |  |  |  |  |  |  |  |  |  |  |  |  |  |  |  |  |  |  |  |  |  |  |  |  |  |  |  |  |  |  |  |  |  |  |  |  |  |  |  |  |  |  |  |  |  |  |  |  |  |  |  |  |  |  |  |  |  |  |  |  |  |  |  |  |  |  |  |  |  |  |  |  |  |  |  |  |  |  |  |  |  |  |  |  |  |  |  |  |  |  |  |  |  |  |  |  |  |  |  |  |  |  |  |  |  |  |  |  |  |  |  |  |  |  |  |  |  |  |  |  |  |  |  |  |  |  |  |  |  |  |  |  |  |  |  |  |  |  |  |  |  |  |  |  |  |  |  |  |  |  |  |  |  |  |  |  |  |  |  |  |  |  |  |  |  |  |  |  |  |  |  |  |  |  |  |  |  |  |  |  |  |  |  |  |  |  |  |  |  |  |  |  |  |  |  |  |  |  |  |  |  |  |  |  |  |  |  |  |  |  |  |  |  |  |  |  |  |  |  |  |  |  |  |  |  |  |  |  |  |  |  |  |  |  |  |  |  |  |  |  |  |  |  |  |  |  |  |  |  |  |  |  |  |  |  |  |  |  |  |  |  |  |  |  |  |  |  |  |  |  |  |  |  |  |  |  |  |  |  |  |  |  |  |  |  |  |  |  |  |  |  |  |  |  |  |  |  |  |  |  |  |  |  |  |  |  |  |  |  |  |  |  |  |  |  |  |  |  |  |  |  |  |  |  |  |  |  |  |  |  |  |  |  |  |  |  |  |  |  |  |  |  |  |  |  |  |  |  |  |  |  |  |  |  |  |  |  |  |  |  |  |  |  |  |  |  |  |  |  |  |  |  |  |  |  |  |  |  |  |  |  |  |  |  |  |  |  |  |  |  |  |  |  |  |  |  |  |  |  |  |  |  |  |  |  |  |  |  |  |  |  |  |  |  |  |  |  |  |  |  |  |  |  |  |  |  |  |  |  |  |  |  |  |  |  |  |  |  |  |  |  |  |  |  |  |  |  |  |  |  |  |  |  |  |  |  |  |  |  |  |  |  |  |  |  |  |  |  |  |  |  |  |  |  |  |  |  |  |  |  |  |  |  |  |  |  |  |  |  |  |  |  |  |  |  |  |  |  |  |  |  |  |  |  |  |  |  |  |  |  |  |  |  |  |  |  |  |  |  |  |  |  |  |  |  |  |  |  |  |  |  |  |  |  |  |  |  |  |  |  |  |  |  |  |  |  |  |  |  |  |  |  |  |  |  |  |  |  |  |  |  |  |  |  |  |  |  |  |  |  |  |  |  |  |  |  |  |  |  |  |  |  |  |  |  |  |  |  |  |  |  |  |  |  |  |  |  |  |  |  |  |  |  |  |  |  |  |  |  |  |  |  |  |  |  |  |  |  |  |  |  |  |  |  |  |  |  |  |  |  |  |  |  |  |  |  |  |  |  |  |  |  |  |  |  |  |  |  |  |  |  |  |  |  |  |  |  |  |  |  |  |  |  |  |  |  |  |  |  |  |  |  |  |  |  |  |  |  |  |  |  |  |  |  |  |  |  |  |  |  |  |  |  |  |  |  |  |  |  |  |  |  |  |  |  |  |  |  |  |  |  |  |  |  |  |  |  |  |  |  |  |  |  |  |  |  |  |  |  |  |  |  |  |  |  |  |  |  |  |  |  |  |  |  |  |  |  |  |  |  |  |  |  |  |  |  |  |  |  |  |  |  |  |  |  |  |  |  |  |  |  |  |  |  |  |  |  |  |  |  |  |  |  |  |  |  |  |  |  |  |  |  |  |  |  |  |  |  |  |  |  |  |  |  |  |  |  |  |  |  |  |  |  |  |  |  |  |  |  |  |  |  |  |  |  |  |  |  |  |  |  |  |  |  |  |  |  |  |  |  |  |  |  |  |  |  |  |  |  |  |  |  |  |  |  |  |  |  |  |  |  |  |  |  |  |  |  |  |  |  |  |  |  |  |  |  |  |  |  |  |  |  |  |  |  |  |  |  |  |  |  |  |  |  |  |  |  |  |  |  |  |  |  |  |  |  |  |  |  |  |  |  |  |  |  |  |  |  |  |  |  |  |  |  |  |  |  |  |  |  |  |  |  |  |  |  |  |  |  |  |  |  |  |  |  |  |  |  |  |  |  |  |  |  |  |  |  |  |  |  |  |  |  |  |  |  |  |  |  |  |  |  |  |  |  |  |  |  |  |  |  |  |  |  |  |  |  |  |  |  |  |  |  |  |  |  |  |  |  |  |  |  |  |  |  |  |  |  |  |  |  |  |  |  |  |  |  |  |  |  |  |  |  |  |  |  |  |  |  |  |    |
|--|--|--|--|--|--|--|--|--|--|--|--|--|--|--|--|--|--|--|--|--|--|--|--|--|--|--|--|--|--|--|--|--|--|--|--|--|--|--|--|--|--|--|--|--|--|--|--|--|--|--|--|--|--|--|--|--|--|--|--|--|--|--|--|--|--|--|--|--|--|--|--|--|--|--|--|--|--|--|--|--|--|--|--|--|--|--|--|--|--|--|--|--|--|--|--|--|--|--|--|--|--|--|--|--|--|--|--|--|--|--|--|--|--|--|--|--|--|--|--|--|--|--|--|--|--|--|--|--|--|--|--|--|--|--|--|--|--|--|--|--|--|--|--|--|--|--|--|--|--|--|--|--|--|--|--|--|--|--|--|--|--|--|--|--|--|--|--|--|--|--|--|--|--|--|--|--|--|--|--|--|--|--|--|--|--|--|--|--|--|--|--|--|--|--|--|--|--|--|--|--|--|--|--|--|--|--|--|--|--|--|--|--|--|--|--|--|--|--|--|--|--|--|--|--|--|--|--|--|--|--|--|--|--|--|--|--|--|--|--|--|--|--|--|--|--|--|--|--|--|--|--|--|--|--|--|--|--|--|--|--|--|--|--|--|--|--|--|--|--|--|--|--|--|--|--|--|--|--|--|--|--|--|--|--|--|--|--|--|--|--|--|--|--|--|--|--|--|--|--|--|--|--|--|--|--|--|--|--|--|--|--|--|--|--|--|--|--|--|--|--|--|--|--|--|--|--|--|--|--|--|--|--|--|--|--|--|--|--|--|--|--|--|--|--|--|--|--|--|--|--|--|--|--|--|--|--|--|--|--|--|--|--|--|--|--|--|--|--|--|--|--|--|--|--|--|--|--|--|--|--|--|--|--|--|--|--|--|--|--|--|--|--|--|--|--|--|--|--|--|--|--|--|--|--|--|--|--|--|--|--|--|--|--|--|--|--|--|--|--|--|--|--|--|--|--|--|--|--|--|--|--|--|--|--|--|--|--|--|--|--|--|--|--|--|--|--|--|--|--|--|--|--|--|--|--|--|--|--|--|--|--|--|--|--|--|--|--|--|--|--|--|--|--|--|--|--|--|--|--|--|--|--|--|--|--|--|--|--|--|--|--|--|--|--|--|--|--|--|--|--|--|--|--|--|--|--|--|--|--|--|--|--|--|--|--|--|--|--|--|--|--|--|--|--|--|--|--|--|--|--|--|--|--|--|--|--|--|--|--|--|--|--|--|--|--|--|--|--|--|--|--|--|--|--|--|--|--|--|--|--|--|--|--|--|--|--|--|--|--|--|--|--|--|--|--|--|--|--|--|--|--|--|--|--|--|--|--|--|--|--|--|--|--|--|--|--|--|--|--|--|--|--|--|--|--|--|--|--|--|--|--|--|--|--|--|--|--|--|--|--|--|--|--|--|--|--|--|--|--|--|--|--|--|--|--|--|--|--|--|--|--|--|--|--|--|--|--|--|--|--|--|--|--|--|--|--|--|--|--|--|--|--|--|--|--|--|--|--|--|--|--|--|--|--|--|--|--|--|--|--|--|--|--|--|--|--|--|--|--|--|--|--|--|--|--|--|--|--|--|--|--|--|--|--|--|--|--|--|--|--|--|--|--|--|--|--|--|--|--|--|--|--|--|--|--|--|--|--|--|--|--|--|--|--|--|--|--|--|--|--|--|--|--|--|--|--|--|--|--|--|--|--|--|--|--|--|--|--|--|--|--|--|--|--|--|--|--|--|--|--|--|--|--|--|--|--|--|--|--|--|--|--|--|--|--|--|--|--|--|--|--|--|--|--|--|--|--|--|--|--|--|--|--|--|--|--|--|--|--|--|--|--|--|--|--|--|--|--|--|--|--|--|--|--|--|--|--|--|--|--|--|--|--|--|--|--|--|--|--|--|--|--|--|--|--|--|--|--|--|--|--|--|--|--|--|--|--|--|--|--|--|--|--|--|--|--|--|--|--|--|--|--|--|--|--|--|--|--|--|--|--|--|--|--|--|--|--|--|--|--|--|--|--|--|--|--|--|--|--|--|--|--|--|--|--|--|--|--|--|--|--|--|--|--|--|--|--|--|--|--|--|--|--|--|--|--|--|--|--|--|--|--|--|--|--|--|--|--|--|--|--|--|--|--|--|--|--|--|--|--|--|--|--|--|--|--|--|--|--|--|--|--|--|--|--|--|--|--|--|--|--|--|--|--|--|--|--|--|--|--|--|--|--|--|--|--|--|--|--|--|--|--|--|--|--|--|--|--|--|--|--|--|--|--|--|--|--|--|--|--|--|--|--|--|--|--|--|--|--|--|--|--|--|--|--|--|--|--|--|--|--|--|--|--|--|--|--|--|--|--|--|--|--|--|--|--|--|--|--|--|--|--|--|--|--|--|--|--|--|--|--|--|--|--|--|--|--|--|--|--|--|--|--|--|--|--|--|--|--|--|--|--|--|--|--|--|--|--|--|--|--|--|--|--|--|--|--|--|--|--|--|--|--|--|--|--|--|--|--|--|--|--|--|--|--|--|--|--|--|--|--|--|--|--|--|--|--|--|--|--|--|--|--|--|--|--|--|--|--|--|--|--|--|--|--|--|--|--|--|--|--|--|--|--|--|--|--|--|--|--|--|--|--|--|--|--|--|--|--|--|--|--|--|--|--|--|--|--|--|--|--|--|--|--|--|--|--|--|--|--|--|--|--|--|--|--|--|--|--|--|--|--|--|--|--|--|--|--|--|--|--|--|--|--|--|--|--|--|--|--|--|--|--|--|--|--|--|--|--|--|--|--|--|--|--|--|--|--|--|--|--|--|--|--|--|--|--|--|--|--|--|--|--|--|--|--|--|--|--|--|--|--|--|--|--|--|--|--|--|--|--|--|--|--|--|--|--|--|--|--|--|--|--|--|--|--|--|--|--|--|--|--|--|--|--|--|--|--|--|--|--|--|--|--|--|--|--|--|--|--|--|--|--|--|--|--|--|--|--|--|--|--|--|--|--|--|--|--|--|--|--|--|--|--|--|--|--|--|--|--|--|--|--|--|--|--|--|--|--|--|--|--|--|--|--|--|--|--|--|--|--|--|--|--|--|--|--|--|--|--|--|--|--|--|--|--|--|--|--|--|----|
|  |  |  |  |  |  |  |  |  |  |  |  |  |  |  |  |  |  |  |  |  |  |  |  |  |  |  |  |  |  |  |  |  |  |  |  |  |  |  |  |  |  |  |  |  |  |  |  |  |  |  |  |  |  |  |  |  |  |  |  |  |  |  |  |  |  |  |  |  |  |  |  |  |  |  |  |  |  |  |  |  |  |  |  |  |  |  |  |  |  |  |  |  |  |  |  |  |  |  |  |  |  |  |  |  |  |  |  |  |  |  |  |  |  |  |  |  |  |  |  |  |  |  |  |  |  |  |  |  |  |  |  |  |  |  |  |  |  |  |  |  |  |  |  |  |  |  |  |  |  |  |  |  |  |  |  |  |  |  |  |  |  |  |  |  |  |  |  |  |  |  |  |  |  |  |  |  |  |  |  |  |  |  |  |  |  |  |  |  |  |  |  |  |  |  |  |  |  |  |  |  |  |  |  |  |  |  |  |  |  |  |  |  |  |  |  |  |  |  |  |  |  |  |  |  |  |  |  |  |  |  |  |  |  |  |  |  |  |  |  |  |  |  |  |  |  |  |  |  |  |  |  |  |  |  |  |  |  |  |  |  |  |  |  |  |  |  |  |  |  |  |  |  |  |  |  |  |  |  |  |  |  |  |  |  |  |  |  |  |  |  |  |  |  |  |  |  |  |  |  |  |  |  |  |  |  |  |  |  |  |  |  |  |  |  |  |  |  |  |  |  |  |  |  |  |  |  |  |  |  |  |  |  |  |  |  |  |  |  |  |  |  |  |  |  |  |  |  |  |  |  |  |  |  |  |  |  |  |  |  |  |  |  |  |  |  |  |  |  |  |  |  |  |  |  |  |  |  |  |  |  |  |  |  |  |  |  |  |  |  |  |  |  |  |  |  |  |  |  |  |  |  |  |  |  |  |  |  |  |  |  |  |  |  |  |  |  |  |  |  |  |  |  |  |  |  |  |  |  |  |  |  |  |  |  |  |  |  |  |  |  |  |  |  |  |  |  |  |  |  |  |  |  |  |  |  |  |  |  |  |  |  |  |  |  |  |  |  |  |  |  |  |  |  |  |  |  |  |  |  |  |  |  |  |  |  |  |  |  |  |  |  |  |  |  |  |  |  |  |  |  |  |  |  |  |  |  |  |  |  |  |  |  |  |  |  |  |  |  |  |  |  |  |  |  |  |  |  |  |  |  |  |  |  |  |  |  |  |  |  |  |  |  |  |  |  |  |  |  |  |  |  |  |  |  |  |  |  |  |  |  |  |  |  |  |  |  |  |  |  |  |  |  |  |  |  |  |  |  |  |  |  |  |  |  |  |  |  |  |  |  |  |  |  |  |  |  |  |  |  |  |  |  |  |  |  |  |  |  |  |  |  |  |  |  |  |  |  |  |  |  |  |  |  |  |  |  |  |  |  |  |  |  |  |  |  |  |  |  |  |  |  |  |  |  |  |  |  |  |  |  |  |  |  |  |  |  |  |  |  |  |  |  |  |  |  |  |  |  |  |  |  |  |  |  |  |  |  |  |  |  |  |  |  |  |  |  |  |  |  |  |  |  |  |  |  |  |  |  |  |  |  |  |  |  |  |  |  |  |  |  |  |  |  |  |  |  |  |  |  |  |  |  |  |  |  |  |  |  |  |  |  |  |  |  |  |  |  |  |  |  |  |  |  |  |  |  |  |  |  |  |  |  |  |  |  |  |  |  |  |  |  |  |  |  |  |  |  |  |  |  |  |  |  |  |  |  |  |  |  |  |  |  |  |  |  |  |  |  |  |  |  |  |  |  |  |  |  |  |  |  |  |  |  |  |  |  |  |  |  |  |  |  |  |  |  |  |  |  |  |  |  |  |  |  |  |  |  |  |  |  |  |  |  |  |  |  |  |  |  |  |  |  |  |  |  |  |  |  |  |  |  |  |  |  |  |  |  |  |  |  |  |  |  |  |  |  |  |  |  |  |  |  |  |  |  |  |  |  |  |  |  |  |  |  |  |  |  |  |  |  |  |  |  |  |  |  |  |  |  |  |  |  |  |  |  |  |  |  |  |  |  |  |  |  |  |  |  |  |  |  |  |  |  |  |  |  |  |  |  |  |  |  |  |  |  |  |  |  |  |  |  |  |  |  |  |  |  |  |  |  |  |  |  |  |  |  |  |  |  |  |  |  |  |  |  |  |  |  |  |  |  |  |  |  |  |  |  |  |  |  |  |  |  |  |  |  |  |  |  |  |  |  |  |  |  |  |  |  |  |  |  |  |  |  |  |  |  |  |  |  |  |  |  |  |  |  |  |  |  |  |  |  |  |  |  |  |  |  |  |  |  |  |  |  |  |  |  |  |  |  |  |  |  |  |  |  |  |  |  |  |  |  |  |  |  |  |  |  |  |  |  |  |  |  |  |  |  |  |  |  |  |  |  |  |  |  |  |  |  |  |  |  |  |  |  |  |  |  |  |  |  |  |  |  |  |  |  |  |  |  |  |  |  |  |  |  |  |  |  |  |  |  |  |  |  |  |  |  |  |  |  |  |  |  |  |  |  |  |  |  |  |  |  |  |  |  |  |  |  |  |  |  |  |  |  |  |  |  |  |  |  |  |  |  |  |  |  |  |  |  |  |  |  |  |  |  |  |  |  |  |  |  |  |  |  |  |  |  |  |  |  |  |  |  |  |  |  |  |  |  |  |  |  |  |  |  |  |  |  |  |  |  |  |  |  |  |  |  |  |  |  |  |  |  |  |  |  |  |  |  |  |  |  |  |  |  |  |  |  |  |  |  |  |  |  |  |  |  |  |  |  |  |  |  |  |  |  |  |  |  |  |  |  |  |  |  |  |  |  |  |  |  |  |  |  |  |  |  |  |  |  |  |  |  |  |  |  |  |  |  |  |  |  |  |  |  |  |  |  |  |  |  |  |  |  |  |  |  |  |  |  |  |  |  |  |  |  |  |  |  |  |  |  |  |  |  |  |  |  |  |  |  |  |  |  |  |  |  |  |  |  |  |  |  |  |  |  |  |  |  |  |  |  |  |  |  |  |  |  |  |  |  |  |  |  |  |  |  |  |  |  |  |  |  |  |  |  |  |  |  |  |  |  |  |  |  |  |  |  |  | </ |
|--|--|--|--|--|--|--|--|--|--|--|--|--|--|--|--|--|--|--|--|--|--|--|--|--|--|--|--|--|--|--|--|--|--|--|--|--|--|--|--|--|--|--|--|--|--|--|--|--|--|--|--|--|--|--|--|--|--|--|--|--|--|--|--|--|--|--|--|--|--|--|--|--|--|--|--|--|--|--|--|--|--|--|--|--|--|--|--|--|--|--|--|--|--|--|--|--|--|--|--|--|--|--|--|--|--|--|--|--|--|--|--|--|--|--|--|--|--|--|--|--|--|--|--|--|--|--|--|--|--|--|--|--|--|--|--|--|--|--|--|--|--|--|--|--|--|--|--|--|--|--|--|--|--|--|--|--|--|--|--|--|--|--|--|--|--|--|--|--|--|--|--|--|--|--|--|--|--|--|--|--|--|--|--|--|--|--|--|--|--|--|--|--|--|--|--|--|--|--|--|--|--|--|--|--|--|--|--|--|--|--|--|--|--|--|--|--|--|--|--|--|--|--|--|--|--|--|--|--|--|--|--|--|--|--|--|--|--|--|--|--|--|--|--|--|--|--|--|--|--|--|--|--|--|--|--|--|--|--|--|--|--|--|--|--|--|--|--|--|--|--|--|--|--|--|--|--|--|--|--|--|--|--|--|--|--|--|--|--|--|--|--|--|--|--|--|--|--|--|--|--|--|--|--|--|--|--|--|--|--|--|--|--|--|--|--|--|--|--|--|--|--|--|--|--|--|--|--|--|--|--|--|--|--|--|--|--|--|--|--|--|--|--|--|--|--|--|--|--|--|--|--|--|--|--|--|--|--|--|--|--|--|--|--|--|--|--|--|--|--|--|--|--|--|--|--|--|--|--|--|--|--|--|--|--|--|--|--|--|--|--|--|--|--|--|--|--|--|--|--|--|--|--|--|--|--|--|--|--|--|--|--|--|--|--|--|--|--|--|--|--|--|--|--|--|--|--|--|--|--|--|--|--|--|--|--|--|--|--|--|--|--|--|--|--|--|--|--|--|--|--|--|--|--|--|--|--|--|--|--|--|--|--|--|--|--|--|--|--|--|--|--|--|--|--|--|--|--|--|--|--|--|--|--|--|--|--|--|--|--|--|--|--|--|--|--|--|--|--|--|--|--|--|--|--|--|--|--|--|--|--|--|--|--|--|--|--|--|--|--|--|--|--|--|--|--|--|--|--|--|--|--|--|--|--|--|--|--|--|--|--|--|--|--|--|--|--|--|--|--|--|--|--|--|--|--|--|--|--|--|--|--|--|--|--|--|--|--|--|--|--|--|--|--|--|--|--|--|--|--|--|--|--|--|--|--|--|--|--|--|--|--|--|--|--|--|--|--|--|--|--|--|--|--|--|--|--|--|--|--|--|--|--|--|--|--|--|--|--|--|--|--|--|--|--|--|--|--|--|--|--|--|--|--|--|--|--|--|--|--|--|--|--|--|--|--|--|--|--|--|--|--|--|--|--|--|--|--|--|--|--|--|--|--|--|--|--|--|--|--|--|--|--|--|--|--|--|--|--|--|--|--|--|--|--|--|--|--|--|--|--|--|--|--|--|--|--|--|--|--|--|--|--|--|--|--|--|--|--|--|--|--|--|--|--|--|--|--|--|--|--|--|--|--|--|--|--|--|--|--|--|--|--|--|--|--|--|--|--|--|--|--|--|--|--|--|--|--|--|--|--|--|--|--|--|--|--|--|--|--|--|--|--|--|--|--|--|--|--|--|--|--|--|--|--|--|--|--|--|--|--|--|--|--|--|--|--|--|--|--|--|--|--|--|--|--|--|--|--|--|--|--|--|--|--|--|--|--|--|--|--|--|--|--|--|--|--|--|--|--|--|--|--|--|--|--|--|--|--|--|--|--|--|--|--|--|--|--|--|--|--|--|--|--|--|--|--|--|--|--|--|--|--|--|--|--|--|--|--|--|--|--|--|--|--|--|--|--|--|--|--|--|--|--|--|--|--|--|--|--|--|--|--|--|--|--|--|--|--|--|--|--|--|--|--|--|--|--|--|--|--|--|--|--|--|--|--|--|--|--|--|--|--|--|--|--|--|--|--|--|--|--|--|--|--|--|--|--|--|--|--|--|--|--|--|--|--|--|--|--|--|--|--|--|--|--|--|--|--|--|--|--|--|--|--|--|--|--|--|--|--|--|--|--|--|--|--|--|--|--|--|--|--|--|--|--|--|--|--|--|--|--|--|--|--|--|--|--|--|--|--|--|--|--|--|--|--|--|--|--|--|--|--|--|--|--|--|--|--|--|--|--|--|--|--|--|--|--|--|--|--|--|--|--|--|--|--|--|--|--|--|--|--|--|--|--|--|--|--|--|--|--|--|--|--|--|--|--|--|--|--|--|--|--|--|--|--|--|--|--|--|--|--|--|--|--|--|--|--|--|--|--|--|--|--|--|--|--|--|--|--|--|--|--|--|--|--|--|--|--|--|--|--|--|--|--|--|--|--|--|--|--|--|--|--|--|--|--|--|--|--|--|--|--|--|--|--|--|--|--|--|--|--|--|--|--|--|--|--|--|--|--|--|--|--|--|--|--|--|--|--|--|--|--|--|--|--|--|--|--|--|--|--|--|--|--|--|--|--|--|--|--|--|--|--|--|--|--|--|--|--|--|--|--|--|--|--|--|--|--|--|--|--|--|--|--|--|--|--|--|--|--|--|--|--|--|--|--|--|--|--|--|--|--|--|--|--|--|--|--|--|--|--|--|--|--|--|--|--|--|--|--|--|--|--|--|--|--|--|--|--|--|--|--|--|--|--|--|--|--|--|--|--|--|--|--|--|--|--|--|--|--|--|--|--|--|--|--|--|--|--|--|--|--|--|--|--|--|--|--|--|--|--|--|--|--|--|--|--|--|--|--|--|--|--|--|--|--|--|--|--|--|--|--|--|--|--|--|--|--|--|--|--|--|--|--|--|--|--|--|--|--|--|--|--|--|--|--|--|--|--|--|--|--|--|--|--|--|--|--|--|--|--|--|--|--|--|--|--|--|--|--|--|--|--|--|--|--|--|--|--|--|--|--|--|--|--|--|--|--|--|--|--|--|--|--|--|--|--|--|--|--|--|--|--|--|--|--|--|--|--|----|

|                         |          |                                                                                                                                                                                           |                                               |                                                     |                                                                                                                                                                                                                                                                                                                  |                                                                                                                                        |                                                                                                                                                                                                                                  |                                                                                                                                                                                    |           |                                                                                                                         |
|-------------------------|----------|-------------------------------------------------------------------------------------------------------------------------------------------------------------------------------------------|-----------------------------------------------|-----------------------------------------------------|------------------------------------------------------------------------------------------------------------------------------------------------------------------------------------------------------------------------------------------------------------------------------------------------------------------|----------------------------------------------------------------------------------------------------------------------------------------|----------------------------------------------------------------------------------------------------------------------------------------------------------------------------------------------------------------------------------|------------------------------------------------------------------------------------------------------------------------------------------------------------------------------------|-----------|-------------------------------------------------------------------------------------------------------------------------|
|                         |          |                                                                                                                                                                                           |                                               |                                                     |                                                                                                                                                                                                                                                                                                                  |                                                                                                                                        |                                                                                                                                                                                                                                  |                                                                                                                                                                                    |           | there must be a mutual agreement between the caregiver and the organization for investment in professional development. |
| Fukui et al – 2011 [65] | 8 nurses | Effectiveness of communication skills training of nurses on the quality of life and satisfaction with healthcare professionals among newly diagnosed cancer patients: A preliminary study | 4 cancer screening institutions in east Japan | Secondary analysis of a randomized controlled trial | Newly diagnosed and informed of cancer, from January to December 2006; primary nurse present at the physician consultation; age over 18 years; not advanced and operable stage; diagnosed with gastric, colorectal, or breast cancer, the 3 major sites most tested at the center; and written informed consent. | Random assignment to an experimental group attending communication skills training program (4 nurses) or to a control group (4 nurses) | Effectiveness for patient quality of life and their satisfaction with healthcare professionals was assessed by administering the SF-8 and a single-item VAS three times (1 week after diagnosis, 1 month after, and at 3 months) | Repeated measures analysis of variance showed a group-by-time significant increase of the mental aspects of SF-8 (F53.48; P50.03) and satisfaction with the nurse (F53.18; p50.04) | Selection |                                                                                                                         |

## References

1. Koroukian, S.M.; Xu, F.; Beaird, H.; Diaz, M.; Murray, P.; Rose, J.H. Complexity of Care Needs and Unstaged Cancer in Elders: A Population-Based Study. *Cancer Detect Prev.* **2007**, *31*, 199–206, doi:10.1016/j.cdp.2007.04.002.
2. Hamaker, M.E.; Hamelinck, V.C.; van Munster, B.C.; Bastiaannet, E.; Smorenburg, C.H.; Achterberg, W.P.; Liefers, G.-J.; de Rooij, S.E. Nonreferral of Nursing Home Patients with Suspected Breast Cancer. *J Am Med Dir Assoc* **2012**, *13*, 464–469, doi:10.1016/j.jamda.2012.01.002.
3. Christos PJ; Oliveria SA; Mâsse LC; McCormick LK; Halpern AC Skin Cancer Prevention and Detection by Nurses: Attitudes, Perceptions, and Barriers. *J. Cancer Educ.* **2004**, *19*, 50–57, doi:10.1207/s15430154jce1901\_12.

4. Bradley, C.J.; Clement, J.P.; Lin, C. Absence of Cancer Diagnosis and Treatment in Elderly Medicaid-Insured Nursing Home Residents. *JNCI: J. Natl. Cancer Inst.* **2008**, *100*, 21–31, doi:10.1093/jnci/djm271.
5. Yadav, N.R.; Jain, M.; Sharma, A.; Yadav, R.; Pahuja, M.; Jain, V. Distribution and Prevalence of Oral Mucosal Lesions in Residents of Old Age Homes in Delhi, India. *Nepal J. Epidemiol.* **2018**, *8*, 727–734, doi:10.3126/nje.v8i2.18708.
6. Clement, J.P.; Bradley, C.J.; Lin, C. Organizational Characteristics and Cancer Care for Nursing Home Residents. *Health Serv. Res.* **2009**, *44*, 1983–2003, doi:10.1111/j.1475-6773.2009.01024.x.
7. Rudel RJ On Breast Cancer Detection, Directors of Nursing and Female Residents: A Study in Rural Long-Term Care. *Online J. Rural Nurs. & Health Care* **2007**, *7*, 21–35, doi:10.14574/ojrnhc.v7i2.135.
8. Wildiers, H.; Mauer, M.; Elseviers, M.; De Wolf, J.; Hatse, S.; Hamaker, M.; Buntinx, F.; De Lepeleire, J.; Uytterschaut, G.; Falandry, C.; et al. Cancer Events in Belgian Nursing Home Residents: An EORTC Prospective Cohort Study. *J. Geriatr Oncol.* **2019**, *10*, 805–810, doi:10.1016/j.jgo.2019.03.005.
9. Darjani, A.; Alizadeh, N.; Rafiei, E.; Moulaei, M.; Naseri Alavi, S.H.; Eftekhari, H.; Rafiei, R.; Gharaei-Nejad, K.; Mohtasham-Amiri, Z. Skin Diseases among the Old Age Residents in a Nursing Home: A Neglected Problem. *Dermatol. Res. Pract.* **2020**, 1–5, doi:10.1155/2020/8849355.
10. Muss, H.B. Adjuvant Chemotherapy in Older and Younger Women With Lymph Node-Positive Breast Cancer. *JAMA* **2005**, *293*, 1073, doi:10.1001/jama.293.9.1073.
11. Liuu, E.; Guyot, N.; Valero, S.; Jamet, A.; Ouazzani, H.E.; Bouchaert, P.; Tourani, J.; Migeot, V.; Paccalin, M. Prevalence of Cancer and Management in Elderly Nursing Home Residents. A Descriptive Study in 45 French Nursing Homes. *Eur. J. Cancer Care* **2019**, *28*, N.PAG-N.PAG, doi:10.1111/ecc.12957.
12. Bern-Klug, M.; Singh, J.; Liu, J.; Shinkunas, L. Prospect Theory Concepts Applied to Family Members of Nursing Home Residents with Cancer: A Good Ending Is a Gain. *J. Soc. Work End Life Palliat Care* **2019**, *15*, 34–54, doi:10.1080/15524256.2019.1580242.
13. Tang, V.; Zhao, S.; Boscardin, J.; Sudore, R.; Covinsky, K.; Walter, L.C.; Esserman, L.; Mukhtar, R.; Finlayson, E. Functional Status and Survival After Breast Cancer Surgery in Nursing Home Residents. *JAMA Surg.* **2018**, *153*, 1090–1096, doi:10.1001/jamasurg.2018.2736.
14. Finlayson, E.; Zhao, S.; Boscardin, W.J.; Fries, B.E.; Landefeld, C.S.; Dudley, R.A. Functional Status after Colon Cancer Surgery in Elderly Nursing Home Residents. *J. Am. Geriatr Soc.* **2012**, *60*, 967–973, doi:10.1111/j.1532-5415.2012.03915.x.
15. Finlayson, E.; Zhao, S.; Varma, M.G. Outcomes after Rectal Cancer Surgery in Elderly Nursing Home Residents. *Dis. Colon Rectum.* **2012**, *55*, 1229–1235, doi:10.1097/DCR.0b013e318267bfe3.
16. Chan, T.Y.; Foo, C.C.; Law, W.L.; Lo, O. Outcomes of Colorectal Cancer Surgery in the Nonagenarians: 20-Year Result from a Tertiary Center. *BMC Surg.* **2019**, *19*, 155, doi:10.1186/s12893-019-0623-4.
17. Williams, G.R.; Dunham, L.; Chang, Y.; Deal, A.M.; Pergolotti, M.; Lund, J.L.; Guerard, E.J.; Kenzik, K.; Muss, H.B.; Sanoff, H.K. Geriatric Assessment to Predict Hospitalization Frequency and Long-Term Care Utilization in Older Adult Cancer Survivors. *J. Clin. Oncol.* **2018**, *36*, doi:10.1200/JCO.2018.36.15-suppl.10036.
18. Buchanan, R.J.; Barkley, J.; Wang, S.; Kim, M. Analyses of Nursing Home Residents with Cancer at Admission. *Cancer Nurs.* **2005**, *28*, 406–414, doi:10.1097/00002820-200509000-00012.
19. Blytt, K.M.; Selbæk, G.; Drageset, J.; Natvig, G.K.; Husebo, B.S. Comorbid Dementia and Cancer in Residents of Nursing Homes: Secondary Analyses of a Cross-Sectional Study. *Cancer Nurs.* **2018**, *41*, E13–E20, doi:10.1097/NCC.0000000000000478.
20. Drageset, J.; Eide, G.E.; Ranhoff, A.H. Cancer in Nursing Homes: Characteristics and Health-Related Quality of Life among Cognitively Intact Residents with and without Cancer. *Cancer Nurs.* **2012**, *35*, 295–301, doi:10.1097/NCC.0b013e31822e7cb8.
21. Wergeland Sørbye, L.; Steindal, S.A.; Kalfoss, M.H.; Vibe, O.E. Opioids, Pain Management, and Palliative Care in a Norwegian Nursing Home From 2013 to 2018. *Health Serv. Insights* **2019**, *12*, N.PAG-N.PAG, doi:10.1177/1178632919834318.
22. Drageset, J.; Eide, G.E.; Dysvik, E.; Furnes, B.; Hauge, S. Loneliness, Loss, and Social Support among Cognitively Intact Older People with Cancer, Living in Nursing Homes—a Mixed-Methods Study. *Clin. Interv. Aging* **2015**, *10*, 1529–1536, doi:10.2147/CIA.S88404.

23. Drageset, J.; Eide, G.E.; Kirkevold, M.; Ranhoff, A.H. Emotional Loneliness Is Associated with Mortality among Mentally Intact Nursing Home Residents with and without Cancer: A Five-Year Follow-up Study. *J. Clin. Nurs.* **2013**, *22*, 106–114, doi:10.1111/j.1365-2702.2012.04209.x.
24. Monroe, T.; Carter, M.; Feldt, K.; Tolley, B.; Cowan, R.L. Assessing Advanced Cancer Pain in Older Adults with Dementia at the End-of-Life. *J. Adv. Nurs.* **2012**, *68*, 2070–2078, doi:10.1111/j.1365-2648.2011.05929.x.
25. Godino C; Jodar L; Durán Á; Martínez I; Schiaffino A Nursing Education as an Intervention to Decrease Fatigue Perception in Oncology Patients. *Eur. J. Oncol. Nurs.* **2006**, *10*, 150–155, doi:10.1016/j.ejon.2005.03.004.
26. Berry, P.H. The Pain of Residents with Terminal Cancer in USA Nursing Homes: Family Members' Perspectives. *Int. J. Palliat. Nurs.* **2007**, *13*, 20–27, doi:10.12968/ijpn.2007.13.1.22777.
27. Pimentel, C.B.; Briesacher, B.A.; Gurwitz, J.H.; Rosen, A.B.; Pimentel, M.T.; Lapane, K.L. Pain Management in Nursing Home Residents with Cancer. *J. Am. Geriatr Soc.* **2015**, *63*, 633–641, doi:10.1111/jgs.13345.
28. Dubé, C.E.; Mack, D.S.; Hunnicutt, J.N.; Lapane, K.L. Cognitive Impairment and Pain Among Nursing Home Residents With Cancer. *J. Pain Symptom Manag.* **2018**, *55*, 1509–1518, doi:10.1016/j.jpainsymman.2018.02.012.
29. Drageset, J.; Eide, G.E.; Ranhoff, A.H. Anxiety and Depression and Mortality among Cognitively Intact Nursing Home Residents with and without a Cancer Diagnosis: A 5-Year Follow-up Study. *Cancer Nurs.* **2013**, *36*, E68–74, doi:10.1097/NCC.0b013e31826fcb11.
30. Lukas, A.; Mayer, B.; Fialová, D.; Topinkova, E.; Gindin, J.; Onder, G.; Bernabei, R.; Nikolaus, T.; Denking, M.D. Pain Characteristics and Pain Control in European Nursing Homes: Cross-Sectional and Longitudinal Results from the Services and Health for Elderly in Long TERM Care (SHELTER) Study. *J. Am. Med. Dir. Assoc.* **2013**, *14*, 421–428, doi:10.1016/j.jamda.2012.12.010.
31. Teno, J.M.; Kabumoto, G.; Wetle, T.; Roy, J.; Mor, V. Daily Pain That Was Excruciating at Some Time in the Previous Week: Prevalence, Characteristics, and Outcomes in Nursing Home Residents. *J. Am. Geriatr Soc.* **2004**, *52*, 762–767, doi:10.1111/j.1532-5415.2004.52215.x.
32. Duncan, J.G.; Bott, M.J.; Thompson, S.A.; Gajewski, B.J. Symptom Occurrence and Associated Clinical Factors in Nursing Home Residents with Cancer. *Res. Nurs. Health* **2009**, *32*, 453–464, doi:10.1002/nur.20331.
33. Hunnicutt, J.N.; Tjia, J.; Lapane, K.L. Hospice Use and Pain Management in Elderly Nursing Home Residents With Cancer. *J. Pain Symptom Manag.* **2017**, *53*, 561–570, doi:10.1016/j.jpainsymman.2016.10.369.
34. Monroe, T.B.; Carter, M.A.; Feldt, K.S.; Dietrich, M.S.; Cowan, R.L. Pain and Hospice Care in Nursing Home Residents with Dementia and Terminal Cancer. *Geriatr. Gerontol. Int.* **2013**, *13*, 1018–1025, doi:10.1111/ggi.12049.
35. Reblin, M.; Clayton, M.F.; Xu, J.; Hulett, J.M.; Latimer, S.; Donaldson, G.W.; Ellington, L. Caregiver, Patient, and Nurse Visit Communication Patterns in Cancer Home Hospice. *Psycho-Oncology* **2017**, *26*, 2285–2293, doi:10.1002/pon.4361.
36. Liu, S.-H.; Hunnicutt, J.N.; Ulbricht, C.M.; Dubé, C.E.; Hume, A.L.; Lapane, K.L. Adjuvant Use and the Intensification of Pharmacologic Management for Pain in Nursing Home Residents with Cancer: Data from a US National Database. *Drugs & Aging* **2019**, *36*, 549–557, doi:10.1007/s40266-019-00650-3.
37. Tseng, Y.-P.; Huang, L.-H.; Huang, T.-H.; Hsu, L.-L.; Hsieh, S.-I. Factors Associated With the Do-Not-Resuscitate Decision Among Surrogates of Elderly Residents at a Nursing Home in Taiwan. *Int. J. Gerontol.* **2017**, *11*, 95–99, doi:10.1016/j.ijge.2016.07.004.
38. Epstein, A.S.; Desai, A.V.; Bernal, C.; Romano, D.; Wan, P.J.; Okpako, M.; Anderson, K.; Chow, K.; Kramer, D.; Calderon, C.; et al. Giving Voice to Patient Values Throughout Cancer: A Novel Nurse-Led Intervention. *J. Pain Symptom Manag.* **2019**, *58*, 72–79.e2, doi:10.1016/j.jpainsymman.2019.04.028.
39. Walling, A.M.; D'Ambruso, S.F.; Malin, J.L.; Hurvitz, S.; Zisser, A.; Coscarelli, A.; Clarke, R.; Hackbarth, A.; Pietras, C.; Watts, F.; et al. Effect and Efficiency of an Embedded Palliative Care Nurse Practitioner in an Oncology Clinic. *J. Oncol. Pract.* **2017**, *13*, e792–e799, doi:10.1200/JOP.2017.020990.
40. Dyason, C.; Simon, J.; Wityk Martin, T.L. Advance Care Planning Discussions among Residents of Long Term Care and Designated Assisted Living: Experience from Calgary, Alberta. *BMJ Support Palliat Care* **2015**, *5*, 48–53, doi:10.1136/bmjspcare-2013-000444.
41. Bai, Q.; Zhang, Z.; Lu, X.; Shi, Y.; Liu, X.; Chan, H. Attitudes towards Palliative Care among Patients and Health Professionals in Henan, China. *Prog. Palliative Care* **2010**, *18*, 341–345, doi:10.1179/1743291X10Y.0000000006.

42. Lawrence, S.; Robinson, A.; Eagar, K. Identification of the Trajectory of Functional Decline for Advance Care Planning in a Nursing Home Population. *Australas J. Ageing* **2017**, *36*, E14–E20, doi:10.1111/ajag.12454.
43. Dobalian, A. Advance Care Planning Documents in Nursing Facilities: Results from a Nationally Representative Survey. *Arch. Gerontol. Geriatr.* **2006**, *43*, 193–212, doi:10.1016/j.archger.2005.10.007.
44. Sommerbakk, R.; Haugen, D.F.; Tjora, A.; Kaasa, S.; Hjermstad, M.J. Barriers to and Facilitators for Implementing Quality Improvements in Palliative Care - Results from a Qualitative Interview Study in Norway. *BMC Palliat Care* **2016**, *15*, 61, doi:10.1186/s12904-016-0132-5.
45. Irvin, S. The Experiences of the Registered Nurse Caring for the Person Dying of Cancer in a Nursing Home. *Collegian* **2000**, *7*, 30–34, doi:10.1016/s1322-7696(08)60388-1.
46. Davies, N.; Maio, L.; van Riet Paap, J.; Mariani, E.; Jaspers, B.; Sommerbakk, R.; Grammatico, D.; Manthorpe, J.; Ahmedzai, S.; Vernooij-Dassen, M.; et al. Quality Palliative Care for Cancer and Dementia in Five European Countries: Some Common Challenges. *Aging Ment. Health* **2014**, *18*, 400–410, doi:10.1080/13607863.2013.843157.
47. Johnston, G.M.; Urquhart, R.; Lethbridge, L.; MacIntyre, M. Increasing Our Understanding of Dying of Breast Cancer: Comorbidities and Care. *Prog. Palliat. Care* **2016**, *24*, 147–152, doi:10.1080/09699260.2015.1108638.
48. Drageset, J.; Eide, G.E.; Ranhoff, A.H. Mortality in Nursing Home Residents without Cognitive Impairment and Its Relation to Self-Reported Health-Related Quality of Life, Sociodemographic Factors, Illness Variables and Cancer Diagnosis: A 5-Year Follow-up Study. *Qual. Life Res.* **2013**, *22*, 317–325, doi:10.1007/s11136-012-0143-5.
49. Bainbridge, D.; Seow, H.; Sussman, J.; Pond, G. Factors Associated with Acute Care Use among Nursing Home Residents Dying of Cancer: A Population-Based Study. *Int. J. Palliat. Nurs.* **2015**, *21*, 349–356, doi:10.12968/ijpn.2015.21.7.349.
50. Boyd, M.; Frey, R.; Balmer, D.; Robinson, J.; McLeod, H.; Foster, S.; Slark, J.; Gott, M. End of Life Care for Long-Term Care Residents with Dementia, Chronic Illness and Cancer: Prospective Staff Survey. *BMC Geriatr* **2019**, *19*, 137, doi:10.1186/s12877-019-1159-2.
51. Kiely, D.K.; Flacker, J.M. Common and Gender Specific Factors Associated with One-Year Mortality in Nursing Home Residents. *J. Am. Med. Dir. Assoc.* **2002**, *3*, 302–309, doi:10.1016/S1525-8610(05)70545-4.
52. Cagle, J.G.; Lee, J.; Ornstein, K.A.; Guralnik, J.M. Hospice Utilization in the United States: A Prospective Cohort Study Comparing Cancer and Noncancer Deaths. *J. Am. Geriatr. Soc.* **2020**, *68*, 783–793, doi:10.1111/jgs.16294.
53. Zueger, P.M.; Holmes, H.M.; Calip, G.S.; Qato, D.M.; Pickard, A.S.; Lee, T.A. Older Medicare Beneficiaries Frequently Continue Medications with Limited Benefit Following Hospice Admission. *J. Gen. Intern. Med.* **2019**, *34*, 2029–2037, doi:10.1007/s11606-019-05152-x.
54. Drageset, J.; Eide, G.E.; Harrington, C.; Ranhoff, A.H. Acute Hospital Admission for Nursing Home Residents without Cognitive Impairment with a Diagnosis of Cancer. *Eur. J. Cancer Care (Engl)* **2015**, *24*, 147–154, doi:10.1111/ecc.12205.
55. MacKenzie, M.A.; Buck, H.G.; Meghani, S.H.; Riegel, B. Unique Correlates of Heart Failure and Cancer Caregiver Satisfaction With Hospice Care. *J. Pain Symptom Manag.* **2016**, *51*, 71–78, doi:10.1016/j.jpainsymman.2015.09.001.
56. Meijers, J.M.M.; Schols, J.M.G.A.; van Bokhorst-de van der Schueren, M.A.E.; Dassen, T.; Janssen, M.A.P.; Halfens, R.J.G. Malnutrition Prevalence in The Netherlands: Results of the Annual Dutch National Prevalence Measurement of Care Problems. *Br. J. Nutr.* **2009**, *101*, 417–423, doi:10.1017/S0007114508998317.
57. Marie Thon Aamodt, I.; Lie, I.; Hellesø, R. Nurses' Perspectives on the Discharge of Cancer Patients with Palliative Care Needs from a Gastroenterology Ward. *Int. J. Palliat. Nurs.* **2013**, *19*, 396–402, doi:10.12968/ijpn.2013.19.8.396.
58. Onder, G.; Vetrano, D.L.; Villani, E.R.; Carfi, A.; Lo Monaco, M.R.; Cipriani, M.C.; Manes Gravina, E.; Denking, M.; Pagano, F.; van der Roest, H.G.; et al. Deprescribing in Nursing Home Residents on Polypharmacy: Incidence and Associated Factors. *J. Am. Med. Dir. Assoc.* **2019**, *20*, 1116–1120, doi:10.1016/j.jamda.2019.01.130.
59. Lage, D.E.; DuMontier, C.; Lee, Y.; Nipp, R.D.; Mitchell, S.L.; Temel, J.S.; El-Jawahri, A.; Berry, S.D.; El-Jawahri, A. Potentially Burdensome End-of-Life Transitions among Nursing Home Residents with Poor-Prognosis Cancer. *Cancer (0008543X)* **2020**, *126*, 1322–1329, doi:10.1002/cncr.32658.



- 
60. Nagamatsu, Y.; Natori, Y.; Yanai, H.; Horiuchi, S. Impact of a Nursing Education Program about Caring for Patients in Japan with Malignant Pleural Mesothelioma on Nurses' Knowledge, Difficulties and Attitude: A Randomized Control Trial. *Nurse Educ. Today* **2014**, *34*, 1087–1093, doi:10.1016/j.nedt.2014.02.007.
  61. Gerhart, J.I.; Sanchez Varela, V.; Burns, J.W. Brief Training on Patient Anger Increases Oncology Providers' Self-Efficacy in Communicating With Angry Patients. *J. Pain Symptom Manag.* **2017**, *54*, 355–360.e2, doi:10.1016/j.jpainsymman.2017.07.039.
  62. Passik SD; Donaghy KB; Theobald DE; Lundberg JC; Holtsclaw E; Dugan WM Jr.; Passik, S.D.; Donaghy, K.B.; Theobald, D.E.; Lundberg, J.C.; et al. Oncology Staff Recognition of Depressive Symptoms on Videotaped Interviews of Depressed Cancer Patients: Implications for Designing a Training Program. *J. Pain Symptom Manag.* **2000**, *19*, 329–338.
  63. Kim, H.S.; Hwang, S.Y.; Oh, E.G.; Lee, J.E. Development and Evaluation of a PBL-based Continuing Education for Clinical Nurses: A Pilot Study. *J. Korean Acad. Nurs.* **2006**, *36*, 1308, doi:10.4040/jkan.2006.36.8.1308.
  64. Bakker, D.; Butler, L.; Fitch, M.; Green, E.; Olson, K.; Cummings, G. Canadian Cancer Nurses' Views on Recruitment and Retention. *J. Nurs. Manag.* **2010**, *18*, 205–214, doi:10.1111/j.1365-2834.2009.01029.x.
  65. Fukui, S.; Ogawa, K.; Yamagishi, A. Effectiveness of Communication Skills Training of Nurses on the Quality of Life and Satisfaction with Healthcare Professionals among Newly Diagnosed Cancer Patients: A Preliminary Study. *Psycho-Oncology* **2011**, *20*, 1285–1291, doi:10.1002/pon.1840.
